# RAD sequencing enables unprecedented phylogenetic resolution and objective species delimitation in recalcitrant divergent taxa

Santiago Herrera<sup>1,2</sup> (sherrera@alum.mit.edu)  
Timothy M. Shank<sup>1</sup> (tshank@whoi.edu)

<sup>1</sup>Massachusetts Institute of Technology, Cambridge, MA, USA

<sup>2</sup>Biology Department, Woods Hole Oceanographic Institution, Woods Hole, MA, USA

## ABSTRACT

Species delimitation is problematic in many taxa due to the difficulty of evaluating predictions from species delimitation hypotheses, which chiefly rely on subjective interpretations of morphological observations and/or DNA sequence data. This problem is exacerbated in recalcitrant taxa for which genetic resources are scarce and inadequate to resolve questions regarding evolutionary relationships and uniqueness. In this case study we demonstrate the empirical utility of restriction site associated DNA sequencing (RAD-seq) by unambiguously resolving phylogenetic relationships among recalcitrant octocoral taxa with divergences greater than 80 million years. We objectively infer robust species boundaries in the genus *Paragorgia*, which contains some of the most important ecosystem engineers in the deep-sea, by testing alternative taxonomy-guided or unguided species delimitation hypotheses using the Bayes factors delimitation method (BFD\*) with genome-wide single nucleotide polymorphism data. We present conclusive evidence rejecting the current morphological species delimitation model for the genus *Paragorgia* and indicating the presence of cryptic species boundaries associated with environmental variables. We argue that the suitability limits of RAD-seq for phylogenetic inferences in divergent taxa cannot be assessed in terms of absolute time, but depend on taxon-specific factors such as mutation rate, generation time and effective population size. We show that classic morphological taxonomy can greatly benefit from integrative approaches that provide objective tests to species delimitation hypothesis. Our results pave the way for addressing further questions in biogeography, species ranges, community ecology, population dynamics, conservation, and evolution in octocorals and other marine taxa.

## INTRODUCTION

Species delimitation is problematic in many taxa due to the difficulty of evaluating predictions from species delimitation hypotheses derived using different species concepts. Species concepts set particular expectations of the properties used to support species delimitations (De Queiroz 2007). For example, the classic biological species concept requires intrinsic reproductive isolation between heterospecific organisms and interbreeding among homospecific organisms resulting in viable and fertile descendants (Mayr 1942; Dobzhansky 1970). In many cases, if not the majority, it is difficult to evaluate behavioral, reproductive, and ecological properties due to technical limitations of field or laboratory work, which largely determine the kind of observations and data that can be obtained. In these cases researchers conventionally rely on morphological observations and/or DNA sequence data to generate species delimitation hypotheses.

Although there have been significant attempts at developing statistical methods to objectively identify species-diagnostic morphological discontinuities (e.g., Zapata & Jimenez 2012), most species delimitations continue to be performed subjectively based on assessments made by specialized taxonomists. Molecular phylogenetic analyses of DNA sequences provide an independent way to test

these species delimitation hypotheses utilizing a variety of methods, ranging from variability thresholds of barcode sequences (Hebert *et al.* 2003), to probabilistic coalescent-based model methods (Pons *et al.* 2006; Yang & Rannala 2010; Fujisawa & Barraclough 2013; Grummer *et al.* 2014). These molecular methods rely on informative DNA sequence markers, and in many cases on resolved phylogenies.

The sub-class Octocorallia (Phylum Cnidaria), which includes animals known as gorgonians, sea pens, and soft corals, is an example of a recalcitrant group where species delimitations are problematic. Octocorals are predominantly a deep-sea group (Cairns 2007; Roberts & Cairns 2014) and therefore are extremely difficult to observe and collect. Classic morphology-based species delimitation and identification in this group is arduous for non-specialists, and challenging to replicate among taxonomists (Daly *et al.* 2007; McFadden *et al.* 2010b). Variations in octocoral colony architecture and micro-skeletal structures – sclerites – are used as species diagnostic characters (Bayer 1956). However, studies over the last 15 years have shown that in many cases species delimitations and systematics based on these morphological traits keep little to no correspondence with the patterns of genetic diversity and relatedness inferred using mitochondrial and ribosomal DNA sequence markers (McFadden *et al.* 2006; Clark *et al.* 2007; France 2007; Dueñas & Sánchez 2009). A confounding factor when analyzing mitochondrial DNA markers is the fact that anthozoans, including octocorals, have slow rates of sequence evolution relative to other metazoans (Shearer *et al.* 2002; Hellberg 2006). Furthermore, octocoral mitochondrion is unique among eukaryotes by having a functional DNA mismatch repair gene — *mtMutS* — which presumably is responsible for the extremely low sequence variability observed in this group (Bilewitch & Degnan 2011). Traditional molecular markers have thus been remarkably insufficient to resolve relationships at all taxonomic levels within the octocorals (Berntson *et al.* 2001; France *et al.* 2002; Mcfadden *et al.* 2004; Smith *et al.* 2004; Thoma *et al.* 2009; Dueñas *et al.* 2014). Alternative nuclear markers, such as the ITS2 and *SRP54* have been used to examine interspecific and intraspecific relationships (Aguilar & Sánchez 2007; Concepcion *et al.* 2007; Grajales *et al.* 2007; Herrera *et al.* 2010); however, their application and impact has been limited due to issues regarding intragenomic variability (Sanchez & Dorado 2008) and low sequencing reliability (Mcfadden *et al.* 2010a). These long-standing technical problems have caused fundamental questions in octocorals regarding species differentiation, systematics, diversity, biogeography, and species ranges to remain unanswered.

Technological developments in next-generation sequencing platforms and library preparation methodologies have made genomic resources increasingly accessible and available for the study of non-model organisms, thus offering a great opportunity to overcome the difficulties inherent to the use of traditional sequencing approaches. One of these methodologies is restriction-site-associated DNA sequencing (RAD-seq), which combines enzymatic fragmentation of genomic DNA with high-throughput sequencing for the generation of large numbers of markers (Baird *et al.* 2008). RAD-seq has shown great promise to resolve difficult phylogenetic, phylogeographic, and species delimitation questions in diverse groups of eukaryotes (Emerson *et al.* 2010; Nadeau *et al.* 2012; Wagner *et al.* 2012; Eaton & Ree 2013; Jones *et al.* 2013; Cruaud *et al.* 2014; Escudero *et al.* 2014; Hipp *et al.* 2014; Leache *et al.* 2014; Herrera *et al.* 2015), including cnidarians (Reitzel *et al.* 2013) and most recently deep-sea octocorals (Pante *et al.* 2014). The number of orthologous restriction sites that can be retained across taxa, which decreases as divergence increases, limits the usefulness of RAD-seq for these kinds of studies. *In silico* studies in model organisms indicate that RAD-seq can be used to infer phylogenetic relationships in young groups of species (up to 60 million years old), such as *Drosophila* (Rubin *et al.* 2012; Cariou *et al.* 2013; Seetharam & Stuart 2013); however, the real limits of this technique have not been significantly explored.

In this study we aim to empirically explore the limits of RAD-seq to solve questions in phylogenetics and species delimitation. We focus on the recalcitrant *Anthomastus-Corallium* clade of octocorals (sensu McFadden *et al.* 2006) to test the utility of RAD-seq to resolve phylogenetic relationships among divergent taxa, and to infer objective species boundaries. Corals in the *Anthomastus-Corallium* clade (hereafter referred as the AC clade) are among the most conspicuous, widely distributed,

and ecologically important benthic invertebrates in deep-water ecosystems (Roberts *et al.* 2009; Wating *et al.* 2011). This clade is constituted by more than 100 species defined morphologically, divided in 10 genera, and three families (World Register of Marine Species at <http://www.marinespecies.org> accessed on 2014-10-10), spanning a divergence time of over 100 million years (Ardila *et al.* 2012; Herrera *et al.* 2012). However, species delimitations and phylogenetic relationships in this clade, as in other octocorals, are controversial and conflictive (Herrera *et al.* 2010; Ardila *et al.* 2012; Herrera *et al.* 2012). Many of the species in this group are considered species indicators of Vulnerable Marine Ecosystems (e.g. ICES 2013), with some of them considered endangered (CITES 2014). Accurate species identifications, as well as complete inventories and knowledge of species ranges, are therefore critical to ensure the effectiveness and appropriateness of conservation and management policies.

## RESULTS

### *Morphological species identifications*

Using current species descriptions, colony observations, and scanning electron microscopy of sclerites, we identified a total of 12 putative morphological species among the 44 examined specimens from the AC clade (**Table S1, Supplementary Material images**). These species correspond to the genera *Paragorgia* (*P. arborea*, *P. stephencairnsi*, *P. johnsoni*, *P. maunga*, *P. alisonae*, *P. kaupeka*, and *P. coralloides*) and *Sibogorgia* (*S. cauliflora*) of the family Paragorgiidae; *Hemicorallium* (*H. laauense-imperiale*) and *Corallium* of the family Coralliidae; and *Anthomastus* and *Heteropolypus* of the family Alcyoniidae.

### *Octocorals are amenable to RAD sequencing*

We generated a dense genome-wide set of genetic markers from the 44 AC clade specimens via RAD sequencing, using the 6-cutter restriction enzyme PstI, and used them to perform phylogenetic inferences and species delimitation analyses. We obtained roughly  $3.9 \pm 1.4$  million reads (average  $\pm$  standard deviation) per individual, of which  $74.3 \pm 8.1\%$  were retained after stringent quality filtering steps (**Table S2**).

### *Optimization of RAD-loci clustering parameters*

To examine the sensitivity of the phylogenetic inference to the clustering parameters used to identify loci and create nucleotide matrices in the program pyRAD (Eaton 2014), we investigated different combinations of clustering thresholds (c 0.80, 0.85 and 0.90) and minimum number of taxa per locus (m 4, 6, and 9) in a reduced ‘**backbone**’ matrix (hereafter matrix names will be highlighted in bold) containing one individual from each of the 12 morphological species. The 9 resulting **backbone** matrices ranged in the total number of loci per matrix from approximately 9 to 60 thousand loci, increasing dramatically as the minimum number of taxa per locus was reduced (**Table S3**). In contrast, the different clustering thresholds did not have a significant effect on the total number of loci, but rather on the number of variable sites and, most importantly, on the number of phylogenetically informative sites (**Table S3**). Each resulting **backbone** matrix analyzed in RAxML (Stamatakis 2006) produced identical strongly-supported tree topologies (**Fig S1**). We selected c 0.80 (80% similarity among sequences) and m 9 (minimum coverage of taxa per locus of 75%) as the optimal combination of loci-clustering parameters because they minimized the proportion of missing data (0.20) in the matrix while maximizing the fraction of variable sites that were phylogenetically informative (0.24) (**Table S3**). The proportion of shared loci among individuals of Paragorgiidae and Coralliidae, lineages whose split has been estimated to be between 80-150 million years ago (Ardila *et al.* 2012; Herrera *et al.* 2012), was remarkably high (70-80%) (**Fig 1**).

We used the selected optimal loci-clustering parameters to generate the ‘**PHYLO**’ matrix, containing the sequence data of all the 44 octocoral specimens. The use of the parameter value c 0.80 yielded approximately  $71 \pm 15$  thousand loci – with a minimum depth of coverage of 5x and after filtering

for paralogs— per specimen (mean depth of clusters used in loci construction was  $23 \pm 8x$ ) (Table S4). The **PHYLO** matrix contained a total of 5,997 loci that contained data for at least 75% of the specimens (after a second paralog removal). There were 85,293 variable sites in this matrix, of which 53,150 were phylogenetically informative.

### ***RAD-seq data support a fully resolved phylogeny***

The phylogenetic analysis of the **PHYLO** concatenated RAD-seq matrix produced a completely resolved evolutionary tree of the AC specimens (Fig 2). In general, all branches were supported by high (greater than 95) bootstrap values, except for the one supporting the clade of *P. johnsoni*, *P. alisonae*, and *P. maunga*. Each one of the morphologically identified families, genera, and species in this dataset were monophyletic. The branching pattern of the tree is consistent with an expected transition between coalescent processes among species and genera (long deep branches), and population processes within species (short shallow branches).

The topology of the tree obtained with a traditional ‘**mitochondrial**’ matrix (711 base pairs of the *mtMutS* gene containing 130 variable sites, of which 101 were phylogenetically informative) was incongruent with the **PHYLO** tree (Fig 2). The **mitochondrial** tree indicated a well-supported alternative divergence order for *P. coralloides* and *P. kaupeka* in the *Paragorgia* clade. In addition, the families Paragorgiidae (bubblegum corals) and Coralliidae (precious corals) were not monophyletic. The bubblegum coral genus *Sibogorgia* appeared more closely related to the precious corals than to the other bubblegum coral genus *Paragorgia*, and the genera *Corallium* and *Hemicorallium* did not form a clade. However, these alternative relationships were not significantly supported by the bootstrap analysis. Indeed, a substantial proportion of branches on the **mitochondrial** tree were poorly supported (bootstrap values smaller than 80%).

### ***RAD-seq data reveal cryptic genetic diversity***

Branch-length differences among individuals, as well as well-supported sub-clades, revealed intraspecific genetic diversity that was undetected by the **mitochondrial** matrix. Two sub-clades were revealed by the phylogenetic analysis of the **PHYLO** matrix in the *P. arborea* and *P. stephencairnsi* clades. The sub-clades in *P. arborea* correspond to a pattern of segregation by geographic location with specimens from the north Pacific in one sub-clade, and specimens from the south Pacific and north Atlantic in the other. Contrastingly, the sub-clades in *P. stephencairnsi* correspond to a pattern of segregation by depth with specimens collected shallower than 350m in one sub-clade, and specimens collected deeper than 1000m in the other.

### ***Current morphological species delimitation is rejected***

To evaluate the utility of RAD-seq to perform objective species delimitations in octocorals we focused on specimens the genus *Paragorgia* as it was the best-sampled taxon in our dataset, both in terms of geographic representation and number of morphological species. We used the Bayes Factor Delimitation method with genomic data (BFD\*) (Leache *et al.* 2014), which allows for the comparison of conflictive species delimitation models in an explicit multispecies coalescent framework using genome-wide single nucleotide polymorphism (SNP) data. We calculated marginal likelihoods of taxonomy-guided and taxonomy-unguided species delimitation models from a matrix of unlinked SNPs including only specimens of *Paragorgia* (‘**PARAGORGIA**’ matrix containing 1,203 SNPs present in all individuals). We compared the marginal likelihood estimates of alternative species delimitation models to the null model ‘**morphid**’, which is based on current morphological species descriptions, using Bayesian factors.

The null model, **morphid**, was rejected in favor of alternative species delimitation models for *Paragorgia* (Fig 3) (**morphid** was ranked 7<sup>th</sup> among 10 evaluated models in terms of the marginal likelihood estimate). The ‘**PABSTE**’ model, which proposes 9 species based on the 7 morphological species in the dataset plus splits corresponding to the sub-clades in *P. arborea* and in *P. stephencairnsi*,

received decisive support from Bayes factors as the best species delimitation model. The taxonomy-unguided model ‘**geo**’ – which splits the specimens based on the geographic location where they were collected – and the models proposed by the Poisson tree processes (PTP) method based on the **mitochondrial** data matrix, were the lowest ranked and most strongly rejected models overall.

### ***Concatenated and coalescent species tree analyses are congruent***

The topology of the species tree inferred using the SNP **PARAGORGIA** matrix was entirely congruent with the topology generated by the maximum likelihood phylogenetic analysis of the concatenated sequence matrices (Fig 4). The species tree analysis also greatly improved support for the clade of *P. johnsoni*, *P. alisonae*, and *P. maunga*. The posterior distribution of species trees indicated a small fraction of conflictive topologies concentrating in this region of the tree.

## **DISCUSSION**

### ***RAD sequencing enables unprecedented phylogenetic resolution***

Our analyses of RAD-seq data provide a robust phylogenetic hypothesis for the recalcitrant octocorals in the *Anthomastus-Corallium* clade, a result never achieved before. Moreover, this study, together with the work by Pante *et al.* (2014) in the octocoral genus *Chrysogorgia*, constitute the first applications of RAD-sequencing for phylogenetics and species delimitation in cnidarians. Only a handful of previous studies, using traditional mitochondrial data and the ITS2 and 28S nuclear markers, have attempted to evaluate phylogenetic relationships in the octocoral AC clade (Herrera *et al.* 2010; Ardila *et al.* 2012; Brockman & McFadden 2012; Herrera *et al.* 2012; McFadden & van Ofwegen 2013; Uda *et al.* 2013; Figueroa & Baco 2014). These studies find support for the monophyly of the genus *Paragorgia*, the family Coralliidae, and the sister relationship between the Paragorgiidae and Coralliidae. However, those data do not provide enough phylogenetic resolution to infer the evolutionary relationships among many of the putative morphological species. Furthermore, significant incongruences between mitochondrial and nuclear ITS2 gene trees from AC taxa have been documented (Herrera *et al.* 2010). Here we reproduce similar incongruences when comparing the trees inferred from mitochondrial and RAD-seq datasets (Fig 2). Likewise, Pante *et al.* (2014) documented marked incongruence between trees inferred from mitochondrial and RAD-seq data in *Chrysogorgia*. These observations suggest that processes that can cause gene tree heterogeneity, such as incomplete lineage sorting and horizontal gene transfer (Maddison 1997; Edwards 2009), may be more prevalent in octocorals than previously recognized.

All of our analyses based on RAD-seq matrices – varying in taxon coverage, degree of divergence among taxa, proportion of missing data, number of loci, and analysis type (concatenated or species tree) – produced completely congruent trees, which together provide extremely high confidence on the phylogenetic hypothesis inferred for the octocoral AC clade (Figs 1, 2 and 3). Consequently, we suggest that single marker gene trees in octocorals, particularly from the mitochondria, should not be considered as robust hypotheses of true species phylogenies on their own, without further validation by multiple informative and independent nuclear loci. We urge systematists to be conservative when making taxonomic rearrangements based on inferences from single-marker data alone.

### ***RAD-seq data is suitable for phylogenetic inference in divergent taxa***

Contrary to the currently accepted idea that RAD-seq data are only suitable for taxa with divergence times younger than 60 million years (MY) (Rubin *et al.* 2012), we demonstrate their suitability well beyond this age threshold. Remarkably, we were able to confidently resolve phylogenetic relationships among genera from different families diverging by at least 80 MY in the AC clade. The split between the families Paragorgiidae and Coralliidae has been dated, using coralliid fossils, to be between 80-150 MY old (Ardila *et al.* 2012; Herrera *et al.* 2012). Park *et al.* (2012) estimated the age of the most recent common ancestor of the Coralliidae at approximately 50 MY (25-100 MY 95% confidence region), using independent cnidarian fossils for molecular clock calibration. The split with the genera *Anthomastus*

and *Heteropolypus* is likely older than 100 MY. It is without question that, due to evolution at restriction sites, the number of RAD loci among taxa for which orthology can be established decreases rapidly as divergence increases. However, we suggest that the suitability limits of RAD-seq for phylogenetics in divergent taxa cannot be assessed in terms absolute time, but depend on taxon-specific factors such as mutation rate, generation time and effective population size.

Bioinformatic studies addressing the issue of extent of the suitability of RAD-seq for phylogenetic inference have focused mainly on *Drosophila* as study model (Rubin *et al.* 2012; Cariou *et al.* 2013). Longer generation times and lower metabolic rates in taxa like deep-sea corals, relative to those in organisms like *Drosophila*, could cause a reduction in mutation rates (see review by Baer *et al.* (2007)), which may in turn decrease the evolutionary rates at restriction sites and allow for phylogenetic inferences using RAD-seq in situations of deeper divergence. Consistent with this hypothesis, we observe a nucleotide diversity ( $\pi$ ) calculated across all octocoral specimens from the **PHYLO** matrix of  $0.012 \pm 0.002$  (considered a minimum since RAD-seq can underestimate diversity (Arnold *et al.* 2013); see **Table S5 and Table S6 for individual values**), which is significantly lower than the nucleotide diversity in many of the *Drosophila* species included in the bioinformatic studies by Cariou *et al.* (2013) and Rubin *et al.* (2012). Nonetheless, there are other important factors known to influence genetic diversity across species – and likely the evolutionary rate as well. These factors include the effective population size, selection, habitat kind, geographic range, and mating system (Leffler *et al.* 2012). To sum up, we argue that RAD-seq can be successfully used to infer phylogenetic relationships in certain taxa with deeper divergences than previously suggested. This is particularly true when the number of RAD loci is maximized through the choice of restriction enzymes with higher cutting frequencies in the target taxon (Herrera *et al.* 2014).

#### ***RAD-seq allows the formulation of robust species delineations***

Our study, the first statistical rigorous test of species hypothesis in octocorals, provides conclusive evidence rejecting the current morphological species delimitation model for the genus *Paragorgia*. We find decisive support for a nested model that combines species boundaries from morphological taxonomy with cryptic diversity linked to environmental variables of geographic location and depth (**Figs 3 and 4**). This nested model, proposes 9 species among the examined specimens. Five of these species correspond to the morphological species *P. coralloides*, *P. kaupeka*, *P. alisonae*, *P. johnsoni*, and *P. maunga*. Two splits, corresponding to sub-clades in the morphological species *P. arborea* and in *P. stephencairnsi*, indicate cases of cryptic species.

Herrera *et al.* (2012) found significant genetic differentiation of the north Pacific populations of *P. arborea* relative to the south Pacific, Atlantic and Indian ocean populations, and suggested that these populations may represent sub-species. The north Pacific populations of *P. arborea* were previously defined as a separate species, *P. pacifica*, by Verrill (1922) based on gross colony morphology, but later combined into a single species by Grasshoff (1979). Sánchez (2005) suggested potential small differences in medullar sclerite sizes and ornamentation between north Pacific specimens and specimens from elsewhere. However, we were unable to recognize these morphological differences in the few examined specimens in this study. Nonetheless, based on the decisive support for the split of *P. arborea* from analysis of genome-wide SNP makers indicates, we resurrect the species *Paragorgia pacifica* for the north Pacific populations of formerly *P. arborea*. We find no evidence of cryptic speciation between the north Atlantic and south Pacific *P. arborea* and therefore conclude it should be considered a single species as previously suggested by Herrera *et al.* (2012).

Depth is an important factor contributing to genetic differentiation and formation of species in the ocean, both shallow (Carlson & Budd 2002; Prada & Hellberg 2013) and deep (Miller *et al.* 2011; Jennings *et al.* 2013; Quattrini *et al.* 2013; Glazier & Etter 2014). The observed cryptic differentiation between specimens of *P. stephencairnsi* collected shallower than 350m and deeper than 1000m indicates that depth is also a diversifying force in octocorals from the AC clade, which had gone undetected due to

the low variability of traditional sequence data (Herrera *et al.* 2012). The holotype of *P. stephencairnsi* was collected from approximately 350m in the Georgia Strait of British Columbia, overlapping in depth range and geographic region with that of most of the specimens from the shallow sub-clade examined in this study. Therefore, we propose to conserve that name *P. stephencairnsi* for that shallow sub-clade, and consider the deep sub-clade as a new species.

Other recent species delimitation studies in anthozoan corals have also revealed significant incongruences when comparing morphological and single-locus species delimitation hypotheses (particularly from mitochondrial data) with phylogenetic evidence from multi-locus datasets (Pante *et al.* 2014; Prada *et al.* 2014). In line with the findings of Pante *et al.* (2014), we find that specimens of *Paragorgia* sharing identical *mtMutS* haplotypes can belong to more than one species. Contrastingly, Herrera *et al.* (2012) present strong evidence showing significant mitochondrial haplotype diversity in the south Pacific and north Atlantic populations of *Paragorgia arborea*. Our observations, together with those from the aforementioned studies, constitute compelling evidence indicating that there is no solid basis for the widespread assumption that *mtMutS* haplotypes may be equivalent to individual octocoral species, as proposed by Thoma *et al.* (2009). The analysis with RAD-seq, or alternative genomic multi-locus methods, of a larger number of specimens from diverse geographic locations and depth horizons will likely reveal further cryptic diversity not characterized by mitochondrial haplotypes (see Fig S2, Fig S3, and Table S8), and thus further illuminates taxonomy and systematics in this and other groups.

## CONCLUSIONS

In this case study we demonstrate the empirical utility of RAD-seq to resolve phylogenetic relationships among divergent and recalcitrant taxa and to objectively infer species boundaries by testing alternative delimitation hypotheses. We were able to make use of RAD-seq to overcome long-standing technical difficulties in octocoral genetics, and to resolve fundamental questions in species definitions and systematics. We show that classic morphological taxonomy can greatly benefit from integrative approaches that provide objective tests to species delimitation hypothesis. Our results pave the way for addressing further questions in biogeography, species ranges, community ecology, population dynamics and evolution of octocorals and other marine taxa. The results from this study also represent a valuable reference resource for the development of tools, such as SNP arrays, that can be used to perform accurate species identifications, and generate species inventories that will aid the design and implementation of conservation and management policies.

## METHODS

To perform identifications using current morphological species descriptions we performed colony observations and scanning electron microscopy of sclerites on 44 octocoral specimens from the AC clade (Table S1).

To obtain a genome-wide set of markers that could be useful for phylogenetic inferences of deep-divergent taxa and species delimitation in the AC clade (greater than 100 million years) we performed RAD sequencing with a the 6-cutter restriction enzyme PstI, which is predicted to cut between 32,000 and 110,000 times in the genome of an octocoral (Table S7). This predicted range was obtained using the observed frequency of the PstI recognition sequence, and its probability calculated using a trinucleotide composition model, in the genomes of the cnidarians *Nematostella vectensis*, *Acropora digitifera*, *Hydra vulgaris*, and *Alatina moseri* (Herrera *et al.* 2014). Genome size range of 0.3-0.5 pg was used based on observations obtained through flow cytometry in gorgoniid octocorals by Luisa Dueñas at the Universidad de los Andes, Bogotá, Colombia (personal communication). Total genomic DNA was purified from specimens following protocols described in Herrera *et al.* (2015). Concentration-normalized genomic DNA was submitted to Floragenex Inc (Eugene, OR). for library preparation and RAD

sequencing. Libraries were sequenced by 48-multiplex, using 10-base pair barcodes, on a single lane of an Illumina Hi-Seq 2000 sequencer.

To compare the inferences obtained from RAD-seq data with the inferences drawn from traditional genetic barcoding data, we performed targeted sequencing of the mitochondrial *mtMutS* gene — a genetic marker widely used for phylogenetics and species delimitation studies in octocorals. Polymerase chain reactions were carried out following the protocols by Herrera *et al.* (2015). Primer pairs used for amplifications were AnthoCorMSH (Herrera *et al.* 2010) and Mut-3458R (Sánchez *et al.* 2003). Negative controls were included in every experiment to test for contamination. Purified PCR products were submitted to Eurofins Genomics (Eurofins MWG Operon, Inc.) for sequencing.

### ***RAD-seq data filtering***

Sequence reads were de-multiplexed and quality filtered with the `process_radtags` program from the package Stacks v1.20 (Catchen *et al.* 2013). Barcodes and Illumina adapters were excluded from each read and length was truncated to 91bp (-t 91). Reads with ambiguous bases were discarded (-c). Reads with an average quality score below 10 (-s 10) within a sliding window of 15% of the read length (-w 0.15) were discarded (-r). The rescue barcodes and RAD-tags algorithm was enabled (-r). Additional filtering, and the clustering within and between individuals to identify loci was performed using the program pyRAD v2.01 (Eaton 2014). Reads with more than 33 bases with a quality score below 20 were discarded.

### ***RAD-seq loci clustering and phylogenetic inference***

We investigated different combinations of clustering thresholds (c 0.80, 0.85 and 0.90) and minimum number of taxa per locus (m 4, 6, and 9) in a reduced dataset that included one individual from each of the 12 putative morphological species. The minimum depth of coverage required to build a cluster and the maximum number of shared polymorphic sites in a locus were kept constant at 4 (d) and 3 (p) respectively. Loci sequences were concatenated into combined matrices. We refer to these 9 resulting matrices as the ‘**backbone**’ matrices. Each of the resulting backbone matrices was analyzed in RAxML-HPC2 v8.0 (Stamatakis 2006) for maximum likelihood (ML) phylogenetic tree inference. For this, and all the other phylogenetic analyses in RAxML, we assumed a generalized time-reversible DNA substitution model with a gamma-distributed rate variation across sites (GTR GAMMA). Branch support was assessed by 500 bootstrap replicates.

We selected an optimal combination of loci clustering parameters as the set of parameters that minimized the number of missing data and maximized the number of phylogenetically informative sites while producing a highly supported phylogenetic tree. The optimal set of parameters chosen was a clustering threshold of 80% similarity among sequences (c 0.80) and a minimum coverage of taxa per locus of 75% (m 9). A concatenated matrix containing the sequence data of all the 44 octocoral specimens, denominated ‘**PHYLO**’, was built using this parameter combination (c 0.80, m 33) in pyRAD and subsequently analyzed in RAxML.

### ***Phylogenetic inference with traditional genetic barcoding data***

To compare the tree topology obtained from the phylogenetic inferences of the **PHYLO** RAD-seq dataset with traditional genetic barcoding data we analyzed the ‘**mitochondrial**’ dataset (containing the *mtMutS* sequences) using RAxML. These two datasets – **PHYLO** and **mitochondrial** – contain data from the same individuals. To place the specimens from this study in a broader phylogenetic context we also analyzed the **mitochondrial** dataset in RAxML with the addition of *mtMutS* data from 233 additional specimens belonging to the AC clade, as well as outgroups (see Table S8, Fig S2, and Fig S3).

### ***Testing species delimitation models for Paragorgia***



We constructed 5 taxonomy-guided species delimitation models for *Paragorgia*: **i)** ‘**morphid**’ model: 7 species based on current morphological species descriptions (Sánchez 2005); **ii)** ‘**PAB**’ model: 8 species based on the 7 morphological species plus a split of *P. arborea* based on previous evidence of genetic differentiation of north Pacific populations (Herrera *et al.* 2012); **iii)** ‘**STE**’ model: 8 species based on the 7 morphological species plus a split of *P. stephencairnsi* based on depth differences (specimens collected <350m vs. >1000m), as depth is known to be an important structuring variable in marine taxa (Jennings *et al.* 2013; Prada & Hellberg 2013; Quattrini *et al.* 2013); **iv)** ‘**PABSTE**’ model: 9 species based on the 7 morphological species plus the splits of the **PAB** and **STE** models; **v)** ‘**splitPAB**’ model: 10 species based on the 7 morphological species plus the split of the **STE** model and an additional split in the **PAB** model where *P. arborea* is split in 3 species corresponding to the ocean basin where the specimens were collected (north Pacific, south Pacific and north Atlantic).

We also generated taxonomy-unguided species delimitation models for *Paragorgia* through Bayesian and ML implementations of the Poisson tree processes model (PTP) (available at <http://species.h-its.org/ptp/>). PTP estimates the number of speciation events in a rooted phylogenetic tree in terms of nucleotide substitutions (Zhang *et al.* 2013). We used PTP to analyze the trees obtained from phylogenetic inferences in RAxML of reduced *mtMutS* and RAD-seq datasets that include only members of the family Paragorgiidae (genera *Paragorgia* and *Sibogorgia*). The ‘**PARAGORGIIDAE**’ RAD-seq concatenated matrix was generated in pyRAD using a clustering threshold of 80% similarity among sequences (c 0.80) and a minimum coverage of taxa per locus of 100% (m 33). The resulting phylogenetic trees of *Paragorgia* were rooted with the specimens of *Sibogorgia* and analyzed by the PTP method using a Markov Chain Monte Carlo (MCMC) chain length of 500,000 generations (100 thinning, 25% burnin). We assessed convergence by examining the likelihood trace. The combinations of the ML or Bayesian PTP implementations (mlPTP and bPTP, respectively) with the *mtMutS* or RAD-seq trees of *Paragorgia* resulted in four species delimitation models: **i)** ‘**mlPTPmt**’ model; **ii)** ‘**bPTPmt**’ model; **iii)** ‘**mlPTPrad**’ model; and **iv)** ‘**bPTPrad**’ model. Lastly, because deep-sea corals are known to show genetic differentiation at ocean basin/regional scales (Miller *et al.* 2011; Morrison *et al.* 2011; Herrera *et al.* 2012), we constructed an additional taxonomy-unguided species delimitation model – the ‘**geo**’ model – based on the geographic location where the specimens were collected (north Pacific, south Pacific or north Atlantic ocean basins).

To estimate the marginal likelihood of each species delimitation model we generated a matrix including only specimens of *Paragorgia*, denominated ‘**PARAGORGIA**’ using a clustering threshold of 80% similarity among sequences (c 0.80) and a minimum coverage of taxa per locus of 100% (m 31) in pyRAD. In contrast to the **backbone**, **PHYLO**, and **PARAGORGIIDAE** RAD-seq matrices, this matrix contained the data of one SNP per locus and not the entire locus sequence. We analyzed these data using the implementation of BFD\* in the SNAPP (Bryant *et al.* 2012) plug-in for the program BEAST v2.1.3 (Bouckaert *et al.* 2014). We performed a path-sampling of 48 steps, with a MCMC chain length of 100,000 (10,000 pre-burnin), following the guidelines from Leache *et al.* (2014). Bayesian factors were calculated from the marginal likelihood estimates for each model and compared using the framework proposed by Kass and Raftery (1995)

### **Species tree inference**

To test the tree topology in the genus *Paragorgia* obtained by the phylogenetic analysis of the **PHYLO** and **PARAGORGIIDAE** concatenated matrices we performed a species tree inference from the SNP data in the **PARAGORGIA** matrix using the program SNAPP. This program allows the inference of species trees from unlinked SNP data (only one SNP per locus retained) bypassing the inference of individual gene trees (Bryant *et al.* 2012). We performed 3 independent runs using a MCMC chain length of 10,000,000 (sampling every 1,000 generations; pre-burnin of 1,000) with default prior distributions for coalescence rate, mutation rate and ancestral population size parameters. We assessed convergence to stationary distributions and effective sample sizes >200 after 10% burnin in the program TRACER

(Rambaut & Drummond 2007). Species trees in the posterior distribution were summarized with the program DENSITREE v2.01 (Bouckaert 2010).

## ACKNOWLEDGEMENTS

This research was supported by the National Geographic Society/Waite Foundation (W285-13 to SH); the National Oceanic and Atmospheric Administration (NA09OAR4320129 to TS); the National Science Foundation (OCE-1131620 to TS); the National Aeronautics and Space Administration (NNX09AB76G to TS); and the Academic Programs Office (Ocean Ventures Fund to SH), the Ocean Exploration Institute (Fellowship support to TMS) and the Ocean Life Institute of the Woods Hole Oceanographic Institution (WHOI).

Specimens provided by the National Institute of Water and Atmospheric Research (NIWA) were collected under research programs: Kermadec Arc Minerals, funded by the New Zealand Ministry of Business, Innovation & Employment (MBIE), Auckland University, Institute of Geological and Nuclear Science (GNS), and WHOI; Ocean Survey 20/20 funded by Land Information New Zealand; Impact of resource use on vulnerable deep-sea communities (CO1X0906), funded by MBIE; Nascent Inter-Ridge Volcanic And Neotectonic Activity, funded by the Ministry for Primary Industries (MPI), GNS, MBIE, and the U. of New Hampshire; Scientific Observer Program funded by MPI; and the Joint New Zealand-USA 2005 NOAA Ring of Fire Expedition, part of NIWA's Seamount Program (FRST CO1X0508). For enabling access to key specimens we thank K. Schnabel (NIWA), S. Mills (NIWA), D. Tracey (NIWA), M. Clark (NIWA), A. Rowden (NIWA), S. Cairns (Smithsonian), E. Cordes (Temple U.), A. Quattrini (Temple U.), G. Workman (Department of Fisheries and Oceans Canada - DFO), M. Wyeth (DFO), K. Anderson (DFO), M. Frey (Royal British Columbia Museum - RBCM), H. Gartner (RBCM), L. Watling (U. Hawaii), J. Adkins (CalTech). We thank P. Aldersdale (CSIRO), N. Ardila (ECOMAR) and J. Sanchez (U. Andes) for assistance with morphological identifications. We also thank E. O'Brien (WHOI), D. Forsman (WHOI), J. Fellows (WHOI), J. & S. Schooner, K. Heylar, and N. McDaniel for invaluable assistance during scuba diving fieldwork in British Columbia (DFO scientific license FIN130270). We thank the chief scientists, masters, crew, scientific personnel, and funding agencies of expeditions AT07-35, KOK0506, Lophelia II 2009, RB-0503, TAN1007, TAN1104, TAN1206, and TAN1213. We also thank A. Tarrant and A. Reitzel for providing helpful comments that improved this manuscript.

## REFERENCES

- Aguilar C, Sánchez JA (2007) Phylogenetic hypotheses of gorgoniid octocorals according to ITS2 and their predicted RNA secondary structures. *Molecular Phylogenetics and Evolution* **43**, 774-786.
- Ardila NE, Giribet G, Sanchez JA (2012) A time-calibrated molecular phylogeny of the precious corals: reconciling discrepancies in the taxonomic classification and insights into their evolutionary history. *BMC Evolutionary Biology* **12**.
- Arnold B, Corbett-Detig RB, Hartl D, Bomblies K (2013) RADseq underestimates diversity and introduces genealogical biases due to nonrandom haplotype sampling. *Molecular Ecology* **22**, 3179-3190.
- Baer CF, Miyamoto MM, Denver DR (2007) Mutation rate variation in multicellular eukaryotes: causes and consequences. *Nature Reviews Genetics* **8**, 619-631.
- Baird NA, Etter PD, Atwood TS, et al. (2008) Rapid SNP discovery and genetic mapping using sequenced RAD markers. *PLoS One* **3**, 3376.
- Bayer FM (1956) Octocorallia. In: *Treatise on Invertebrate Paleontology Part F. Coelenterata* (ed. Moore RC), pp. 163-231. Geological Society of America and University of Kansas Press, Lawrence, Kansas.

- Berntson EA, Bayer FM, McArthur AG, France SC (2001) Phylogenetic relationships within the Octocorallia (Cnidaria: Anthozoa) based on nuclear 18S rRNA sequences. *Marine Biology* **138**, 235-246.
- Bilewitch JP, Degnan SM (2011) A unique horizontal gene transfer event has provided the octocoral mitochondrial genome with an active mismatch repair gene that has potential for an unusual self-contained function. *BMC Evolutionary Biology* **11**, 228.
- Bouckaert R, Heled J, Kuhnert D, *et al.* (2014) BEAST 2: a software platform for Bayesian evolutionary analysis. *PLoS Comput Biol* **10**, e1003537.
- Bouckaert RR (2010) DensiTree: making sense of sets of phylogenetic trees. *Bioinformatics* **26**, 1372-1373.
- Brockman SA, McFadden CS (2012) The mitochondrial genome of *Paraminabea aldersladei* (Cnidaria: Anthozoa: Octocorallia) supports intramolecular recombination as the primary mechanism of gene rearrangement in octocoral mitochondrial genomes. *Genome Biology and Evolution* **4**, 994-1006.
- Bryant D, Bouckaert R, Felsenstein J, Rosenberg NA, RoyChoudhury A (2012) Inferring species trees directly from biallelic genetic markers: Bypassing gene trees in a full coalescent analysis. *Molecular Biology and Evolution* **29**, 1917-1932.
- Cairns S (2007) Deep-water corals: An overview with special reference to diversity and distribution of deep-water scleractinian corals. *Bulletin of Marine Science* **81**, 311-322.
- Cariou M, Duret L, Charlat S (2013) Is RAD-seq suitable for phylogenetic inference? An in silico assessment and optimization. *Ecology and Evolution* **3**, 846-852.
- Carlson DB, Budd AF (2002) Incipient speciation across a depth gradient in a scleractinian coral? *Evolution* **56**, 2227-2242.
- Catchen J, Hohenlohe PA, Bassham S, Amores A, Cresko WA (2013) Stacks: an analysis tool set for population genomics. *Molecular Ecology* **22**, 3124-3140.
- CITES (2014) Appendices I, II and III. Convention on International Trade in Endangered Species of wild fauna and flora, , <http://www.cites.org/sites/default/files/eng/app/2014/E-Appendices-2014-09-14.pdf>.
- Clark AG, Eisen MB, Smith DR, *et al.* (2007) Evolution of genes and genomes on the *Drosophila* phylogeny. *Nature* **450**, 203-218.
- Concepcion GT, Crepeau MW, Wagner D, Kahng SE, Toonen RJ (2007) An alternative to ITS, a hypervariable, single-copy nuclear intron in corals, and its use in detecting cryptic species within the octocoral genus *Carijoa*. *Coral reefs* **27**, 323-336.
- Cruaud A, Gautier M, Galan M, *et al.* (2014) Empirical assessment of RAD sequencing for interspecific phylogeny. *Molecular Biology and Evolution* **31**, 1272-1274.
- Daly M, Brugler MR, Cartwright P, *et al.* (2007) The phylum Cnidaria: A review of phylogenetic patterns and diversity 300 years after Linnaeus. *Zootaxa* **1668**, 127-182.
- De Queiroz K (2007) Species concepts and species delimitation. *Systematic Biology* **56**, 879-886.
- Dobzhansky T (1970) *Genetics of the Evolutionary Process* Columbia University Press, New York,.
- Dueñas LF, Alderslade P, Sánchez JA (2014) Molecular systematics of the deep-sea bamboo corals (Octocorallia: Isididae: Keratoisidinae) from New Zealand with descriptions of two new species of *Keratoisis*. *Molecular Phylogenetics and Evolution* **74**, 15-28.
- Dueñas LF, Sánchez JA (2009) Character lability in deep-sea bamboo corals (Octocorallia, Isididae, Keratoisidinae). *Marine Ecology Progress Series* **397**, 11-23.
- Eaton DA (2014) PyRAD: Assembly of de novo RADseq loci for phylogenetic analyses. *Bioinformatics* **30**, 1844-1849.
- Eaton DAR, Ree RH (2013) Inferring phylogeny and introgression using RADseq data: An example from flowering plants (Pedicularis: Orobanchaceae). *Systematic Biology* **62**, 689-706.
- Edwards SV (2009) Is a new and general theory of molecular systematics emerging? *Evolution* **63**, 1-19.

- Emerson KJ, Merz CR, Catchen JM, *et al.* (2010) Resolving postglacial phylogeography using high-throughput sequencing. *Proceedings of the National Academy of Sciences of the United States of America* **107**, 16196-16200.
- Escudero M, Eaton DAR, Hahn M, Hipp AL (2014) Genotyping-by-sequencing as a tool to infer phylogeny and ancestral hybridization: A case study in *Carex* (Cyperaceae). *Molecular Phylogenetics and Evolution* **79**, 359-367.
- Figueroa DF, Baco AR (2014) Complete mitochondrial genomes elucidate phylogenetic relationships of the deep-sea octocoral families Coralliidae and Paragorgiidae. *Deep-Sea Research Part II-Topical Studies in Oceanography* **99**, 83-91.
- France SC (2007) Genetic analysis of bamboo corals (Cnidaria : Octocorallia : Isididae): Does lack of colony branching distinguish *Lepidisis* from *Keratoisis*? In: *Bulletin of Marine Science*, pp. 323-333.
- France SC, Hoover LL, Hoover LL (2002) DNA sequences of the mitochondrial COI gene have low levels of divergence among deep-sea octocorals (Cnidaria: Anthozoa). *Hydrobiologia* **471**, 149-155.
- Fujisawa T, Barraclough TG (2013) Delimiting species using single-locus data and the generalized mixed Yule coalescent approach: A revised method and evaluation on simulated data sets. *Systematic Biology* **62**, 707-724.
- Glazier AE, Etter RJ (2014) Cryptic speciation along a bathymetric gradient. *Biological Journal of the Linnean Society* **113**, 897-913.
- Grajales A, Aguilar C, Sánchez JA (2007) Phylogenetic reconstruction using secondary structures of Internal Transcribed Spacer 2 (ITS2, rDNA): finding the molecular and morphological gap in Caribbean gorgonian corals. *BMC Evolutionary Biology* **7**, 90.
- Grasshoff M (1979) Zur bipolaren verbreitung der oktokoralle *Paragorgia arborea* (Cnidaria: Anthozoa: Scleraxonia). *Senckenbergiana Maritima* **11**, 115-137.
- Grummer JA, Bryson RW, Reeder TW (2014) Species delimitation using Bayes factors: Simulations and application to the *Sceloporus scalaris* species group (Squamata: Phrynosomatidae). *Systematic Biology* **63**, 119-133.
- Hebert PDN, Cywinska A, Ball SL, DeWaard JR (2003) Biological identifications through DNA barcodes. *Proceedings of the Royal Society B-Biological Sciences* **270**, 313-321.
- Hellberg ME (2006) No variation and low synonymous substitution rates in coral mtDNA despite high nuclear variation. *BMC Evolutionary Biology* **6**.
- Herrera S, Baco A, Sánchez JA (2010) Molecular systematics of the bubblegum coral genera (Paragorgiidae, Octocorallia) and description of a new deep-sea species. *Molecular Phylogenetics and Evolution* **55**, 123-135.
- Herrera S, Reyes-Herrera PH, Shank TM (2014) Genome-wide predictability of restriction sites across the eukaryotic tree of life. *bioRxiv* preprint doi: <http://dx.doi.org/10.1101/007781>
- Herrera S, Shank TM, Sánchez JA (2012) Spatial and temporal patterns of genetic variation in the widespread antitropical deep-sea coral *Paragorgia arborea*. *Molecular Ecology* **21**, 6053-6067.
- Herrera S, Watanabe H, Shank T (2015) Evolutionary and biogeographical patterns of barnacles from deep-sea hydrothermal vents. *Molecular Ecology*, **24**: 673-689.
- Hipp AL, Eaton DAR, Cavender-Bares J, *et al.* (2014) A framework phylogeny of the american oak clade based on sequenced RAD data. *PLoS One* **9**, e93975.
- ICES (2013) Assessment of the list of VME indicator species and elements. International Council for the Exploration of the Sea, [http://www.ices.dk/sites/pub/Publication Reports/Advice/2013/Special requests/NEAFC\\_VME\\_indicator\\_species\\_and\\_elements.pdf](http://www.ices.dk/sites/pub/Publication%20Reports/Advice/2013/Special%20requests/NEAFC_VME_indicator_species_and_elements.pdf).
- Jennings RM, Etter RJ, Ficarra L (2013) Population differentiation and species formation in the deep sea: the potential role of environmental gradients and depth. *PLoS One* **8**, e77594.
- Jones JC, Fan S, Franchini P, Schartl M, Meyer A (2013) The evolutionary history of *Xiphophorus* fish and their sexually selected sword: a genome-wide approach using restriction site-associated DNA sequencing. *Molecular Ecology* **22**, 2986-3001.

- Kass RE, Raftery AE (1995) Bayes Factors. *Journal of the American Statistical Association* **90**, 773-795.
- Leache AD, Fujita MK, Minin VN, Bouckaert RR (2014) Species Delimitation using Genome-Wide SNP Data. *Systematic Biology* **63**, 534-542.
- Leffler EM, Bullaughey K, Matute DR, *et al.* (2012) Revisiting an old riddle: What determines genetic diversity levels within species? *PLoS Biology* **10**, e1001388.
- Maddison WP (1997) Gene trees in species trees. *Systematic Biology* **46**, 523-536.
- Mayr E (1942) *Systematics and the Origin of Species from the Viewpoint of a Zoologist* Columbia University Press, New York,.
- McFadden CS, Benayahu Y, Pante E, *et al.* (2010a) Limitations of mitochondrial gene barcoding in Octocorallia. *Molecular Ecology Resources* **11**, 19-31.
- McFadden CS, France SC, Sánchez JA, Alderslade P (2006) A molecular phylogenetic analysis of the Octocorallia (Cnidaria: Anthozoa) based on mitochondrial protein-coding sequences. *Molecular Phylogenetics and Evolution* **41**, 513-527.
- McFadden CS, Sanchez JA, France SC (2010b) Molecular Phylogenetic Insights into the Evolution of Octocorallia: A Review. *Integrative and Comparative Biology* **50**, 389-410.
- McFadden CS, Tullis ID, Breton Hutchinson M, Winner K, Sohm JA (2004) Variation in Coding (NADH Dehydrogenase Subunits 2, 3, and 6) and Noncoding Intergenic Spacer Regions of the Mitochondrial Genome in Octocorallia (Cnidaria: Anthozoa). *Marine Biotechnology* **6**, 516-526.
- McFadden CS, van Ofwegen LP (2013) Molecular phylogenetic evidence supports a new family of octocorals and a new genus of Alcyoniidae (Octocorallia, Alcyonacea). *Zookeys* **346**, 59-83.
- Miller KJ, Rowden AA, Williams A, Haussermann V (2011) Out of their depth? Isolated deep populations of the cosmopolitan coral *Desmophyllum dianthus* may be highly vulnerable to environmental change. *PLoS One* **6**, e19004.
- Morrison CL, Ross SW, Nizinski MS, *et al.* (2011) Genetic discontinuity among regional populations of *Lophelia pertusa* in the North Atlantic Ocean. *Conservation Genetics* **12**, 713-729.
- Nadeau NJ, Martin SH, Kozak KM, *et al.* (2012) Genome-wide patterns of divergence and gene flow across a butterfly radiation. *Molecular Ecology* **22**, 814-826.
- Pante E, Abdelkrim J, Viricel A, Gey D, France S (2014) Use of RAD sequencing for delimiting species. *Heredity*.
- Park E, Hwang DS, Lee JS, *et al.* (2012) Estimation of divergence times in cnidarian evolution based on mitochondrial protein-coding genes and the fossil record. *Molecular Phylogenetics and Evolution* **62**, 329-345.
- Pons J, Barraclough TG, Gomez-Zurita J, *et al.* (2006) Sequence-based species delimitation for the DNA taxonomy of undescribed insects. *Systematic Biology* **55**, 595-609.
- Prada C, DeBiasse MB, Neigel JE, *et al.* (2014) Genetic species delineation among branching Caribbean *Porites* corals. *Coral Reefs* **33**, 1019-1030.
- Prada C, Hellberg ME (2013) Long prereproductive selection and divergence by depth in a Caribbean candelabrum coral. *Proceedings of the National Academy of Sciences of the United States of America* **110**, 3961-3966.
- Quattrini AM, Georgian SE, Byrnes L, *et al.* (2013) Niche divergence by deep-sea octocorals in the genus *Callogorgia* across the continental slope of the Gulf of Mexico. *Molecular Ecology* **22**, 4123-4140.
- Rambaut A, Drummond AJ (2007) Tracer v1.4, Available from <http://beast.bio.ed.ac.uk/Tracer>.
- Reitzel AM, Herrera S, Layden MJ, Martindale MQ, Shank TM (2013) Going where traditional markers have not gone before: utility of and promise for RAD sequencing in marine invertebrate phylogeography and population genomics. *Molecular Ecology* **22**, 2953-2970.
- Roberts JM, Cairns SD (2014) Cold-water corals in a changing ocean. *Current Opinion in Environmental Sustainability* **7**, 118-126.
- Roberts JM, Wheeler A, Freiwald AR, Cairns SD (2009) *Cold-Water Corals : The Biology and Geology of Deep-Sea Coral Habitats* Cambridge University Press, Cambridge, UK ; New York.

- Rubin BE, Ree RH, Moreau CS (2012) Inferring phylogenies from RAD sequence data. *PLoS One* **7**, e33394.
- Sánchez JA (2005) Systematics of the bubblegum corals (Cnidaria: Octocorallia: Paragorgiidae) with description of new species from New Zealand and the Eastern Pacific. *Zootaxa* **1014**, 1-72.
- Sanchez JA, Dorado D (2008) Intragenomic ITS2 variation in Caribbean seafans. In: *Proceedings of the 11th International Coral Reef Symposium*, pp. 1383-1387, Ft. Lauderdale.
- Sánchez JA, Lasker HR, Taylor DJ (2003) Phylogenetic analyses among octocorals (Cnidaria): mitochondrial and nuclear DNA sequences (1su-rRNA, 16S and ssu-rRNA, 18S) support two convergent clades of branching gorgonians. *Molecular Phylogenetics and Evolution* **29**, 31-42.
- Seetharam AS, Stuart GW (2013) Whole genome phylogeny for 21 *Drosophila* species using predicted 2b-RAD fragments. *PeerJ* **1**, e226.
- Shearer TL, Van Oppen MJH, Romano SL, Worheide G (2002) Slow mitochondrial DNA sequence evolution in the Anthozoa (Cnidaria). *Molecular Ecology* **11**, 2475-2487.
- Smith P, McVeagh S, Mingoia J, France S (2004) Mitochondrial DNA sequence variation in deep-sea bamboo coral (Keratoisidinae) species in the southwest and northwest Pacific Ocean. *Marine Biology* **144**, 253-261.
- Stamatakis A (2006) RAxML-VI-HPC: Maximum likelihood-based phylogenetic analyses with thousands of taxa and mixed models. *Bioinformatics* **22**, 2688-2690.
- Thoma J, Pante E, Brugler M, France S (2009) Deep-sea octocorals and antipatharians show no evidence of seamount-scale endemism in the NW Atlantic. *Marine Ecology Progress Series* **397**, 25-35.
- Uda K, Komeda Y, Fujita T, *et al.* (2013) Complete mitochondrial genomes of the Japanese pink coral (*Corallium elatius*) and the Mediterranean red coral (*Corallium rubrum*): a reevaluation of the phylogeny of the family Coralliidae based on molecular data. *Comparative Biochemistry and Physiology D-Genomics & Proteomics* **8**, 209-219.
- Verrill AE (1922) Part G: Alcyonaria and Actiniaria. *Report of the Canadian Arctic Expedition 1913-18* **8**, 1-164.
- Wagner CE, Keller I, Wittwer S, *et al.* (2012) Genome-wide RAD sequence data provide unprecedented resolution of species boundaries and relationships in the Lake Victoria cichlid adaptive radiation. *Molecular Ecology* **22**, 787-798.
- Wating L, France SC, Pante E, Simpson A (2011) Biology of deep-water octocorals. *Advances in Marine Biology, Vol 60* **60**, 41-122.
- Yang ZH, Rannala B (2010) Bayesian species delimitation using multilocus sequence data. *Proceedings of the National Academy of Sciences of the United States of America* **107**, 9264-9269.
- Zapata F, Jimenez I (2012) Species delimitation: Inferring gaps in morphology across geography. *Systematic Biology* **61**, 179-194.
- Zhang J, Kapli P, Pavlidis P, Stamatakis A (2013) A general species delimitation method with applications to phylogenetic placements. *Bioinformatics* **29**, 2869-2876.

## FIGURES & TABLES

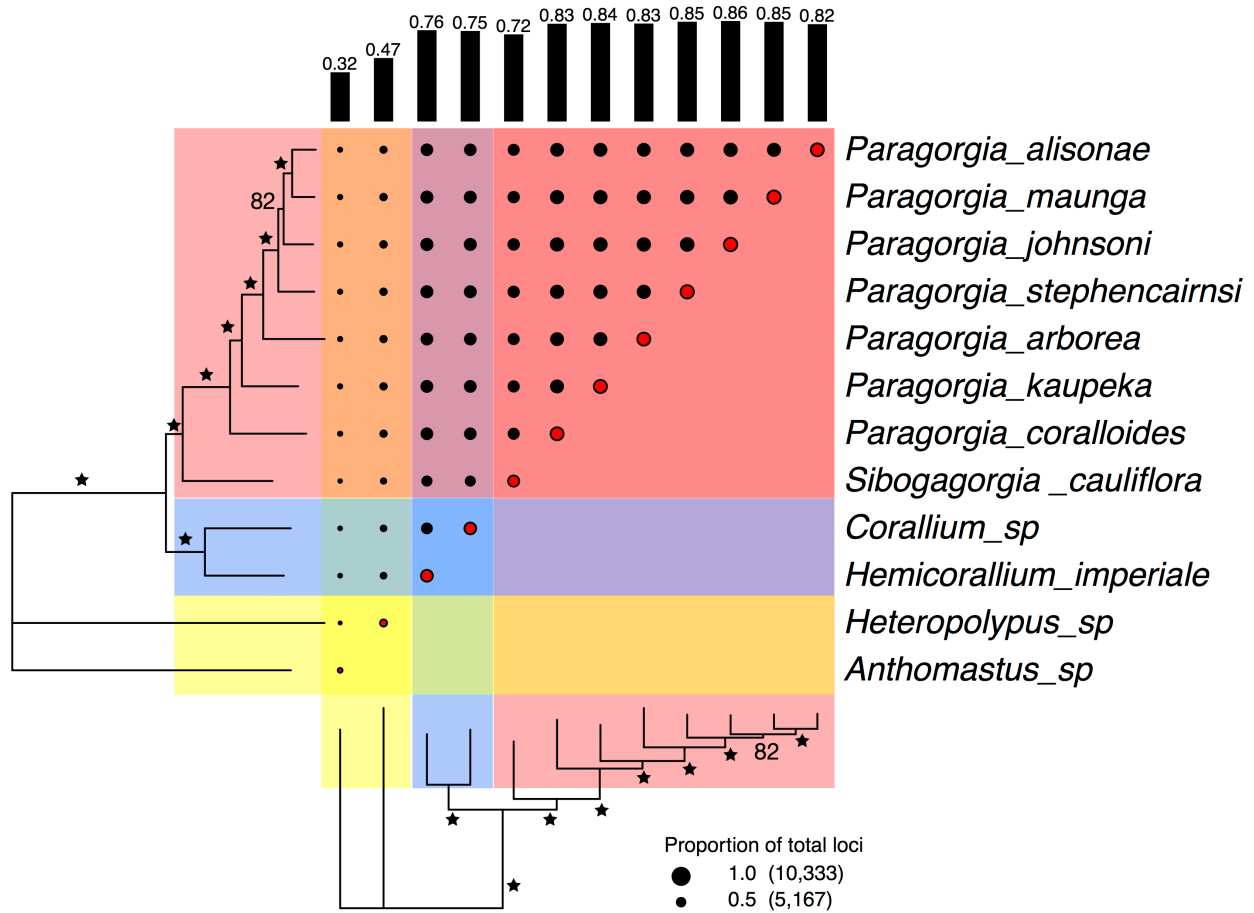

**Figure 1.** Proportion of loci shared among individuals of the AC clade in the optimal backbone matrix (c 0.80, m 9). Each family is indicated with a different color: red for Paragorgiidae; blue for Coralliidae; and yellow for Alcyoniidae. Black-filled circles represent the proportion of the total number of loci shared among individuals. Red-filled circles represent the proportion of the total number of loci present in each individual. Circle scale shows the number of loci represented by 1.0 and 0.5 circle sizes. Black vertical bars represent the average proportion of loci shared by each individual. Phylogenetic tree was inferred with RAxML. Stars on the tree represent branch bootstrap support of 100. Smaller bootstrap support values are indicated with numbers. This figure was generated with the package RADami (Hipp *et al.* 2014).

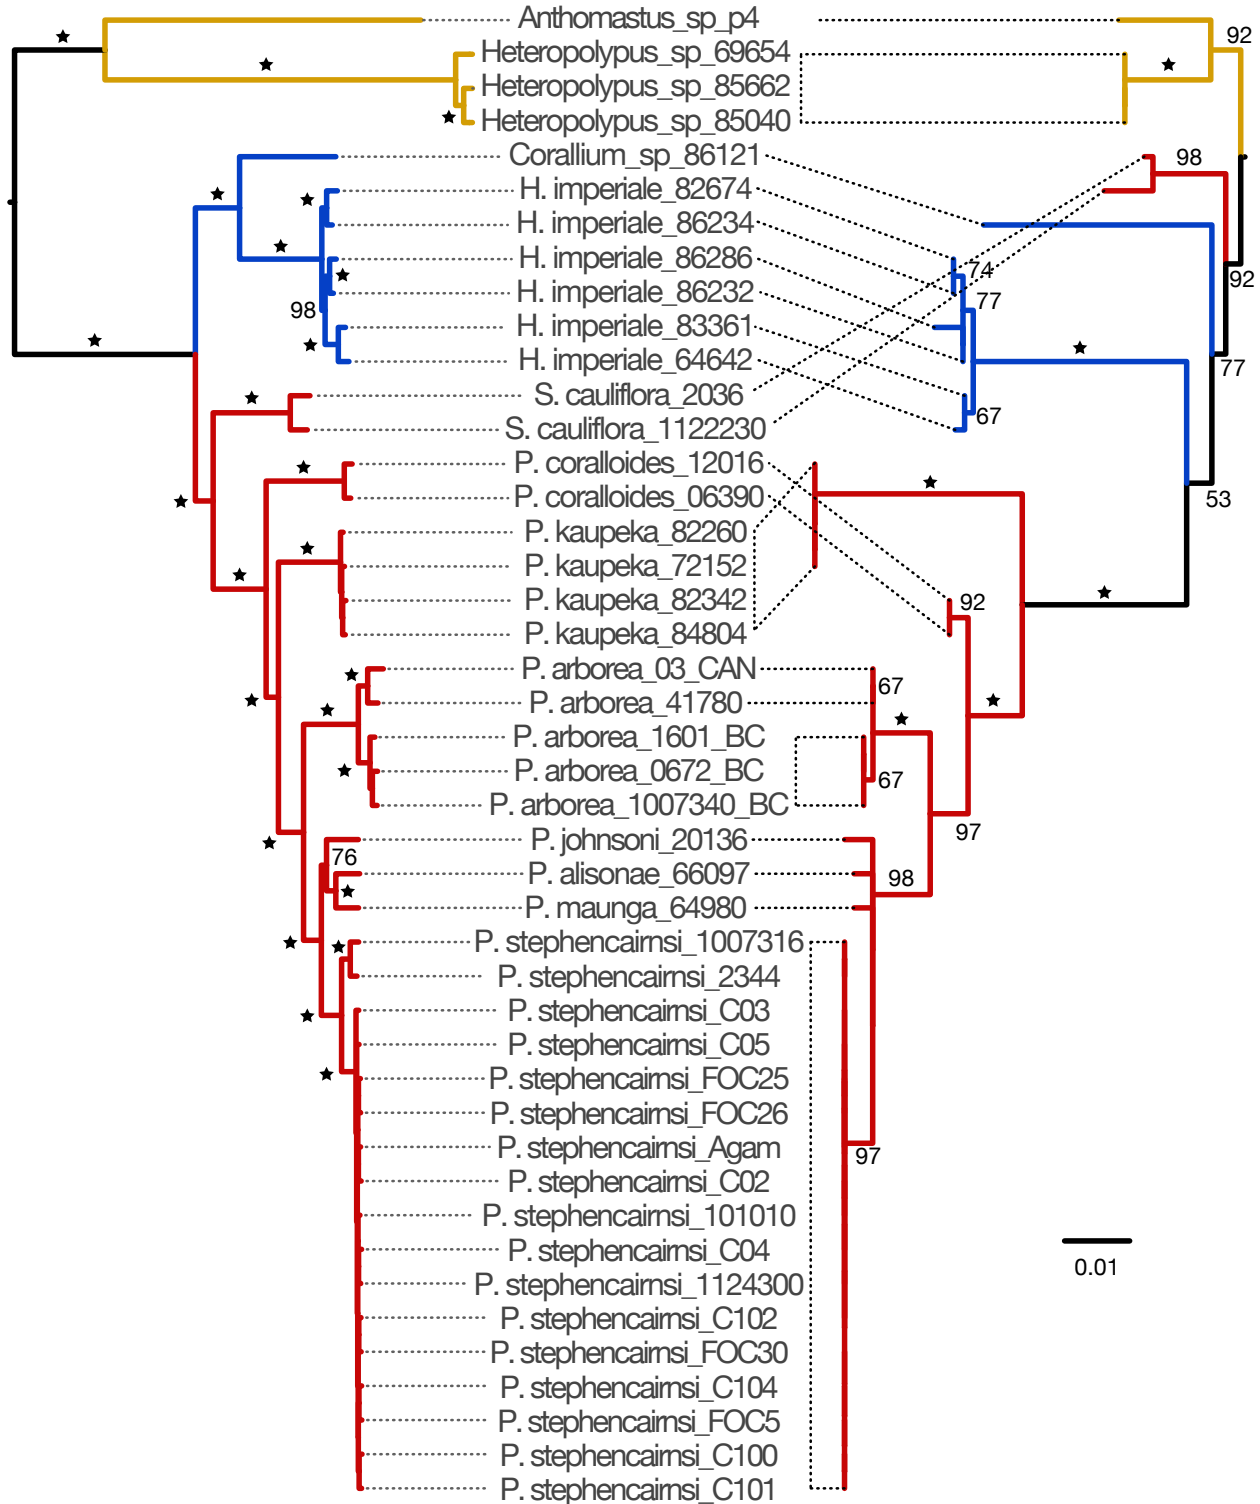

**Figure 2.** Phylogenetic trees of the AC clade based on RAD-seq and mitochondrial data. Left tree based on the RAD-seq concatenated PHYLO matrix. Right tree based on the mtMutS mitochondrial matrix. Each family is indicated with a different branch color: blue red for Paragorgiidae; blue for Coralliidae; and yellow for Alcyoniidae. Phylogenetic trees were inferred with RAxML. Stars on the trees represent bootstrap support of 100. Smaller bootstrap values are indicated in numbers. Scale bar indicates substitutions per site.



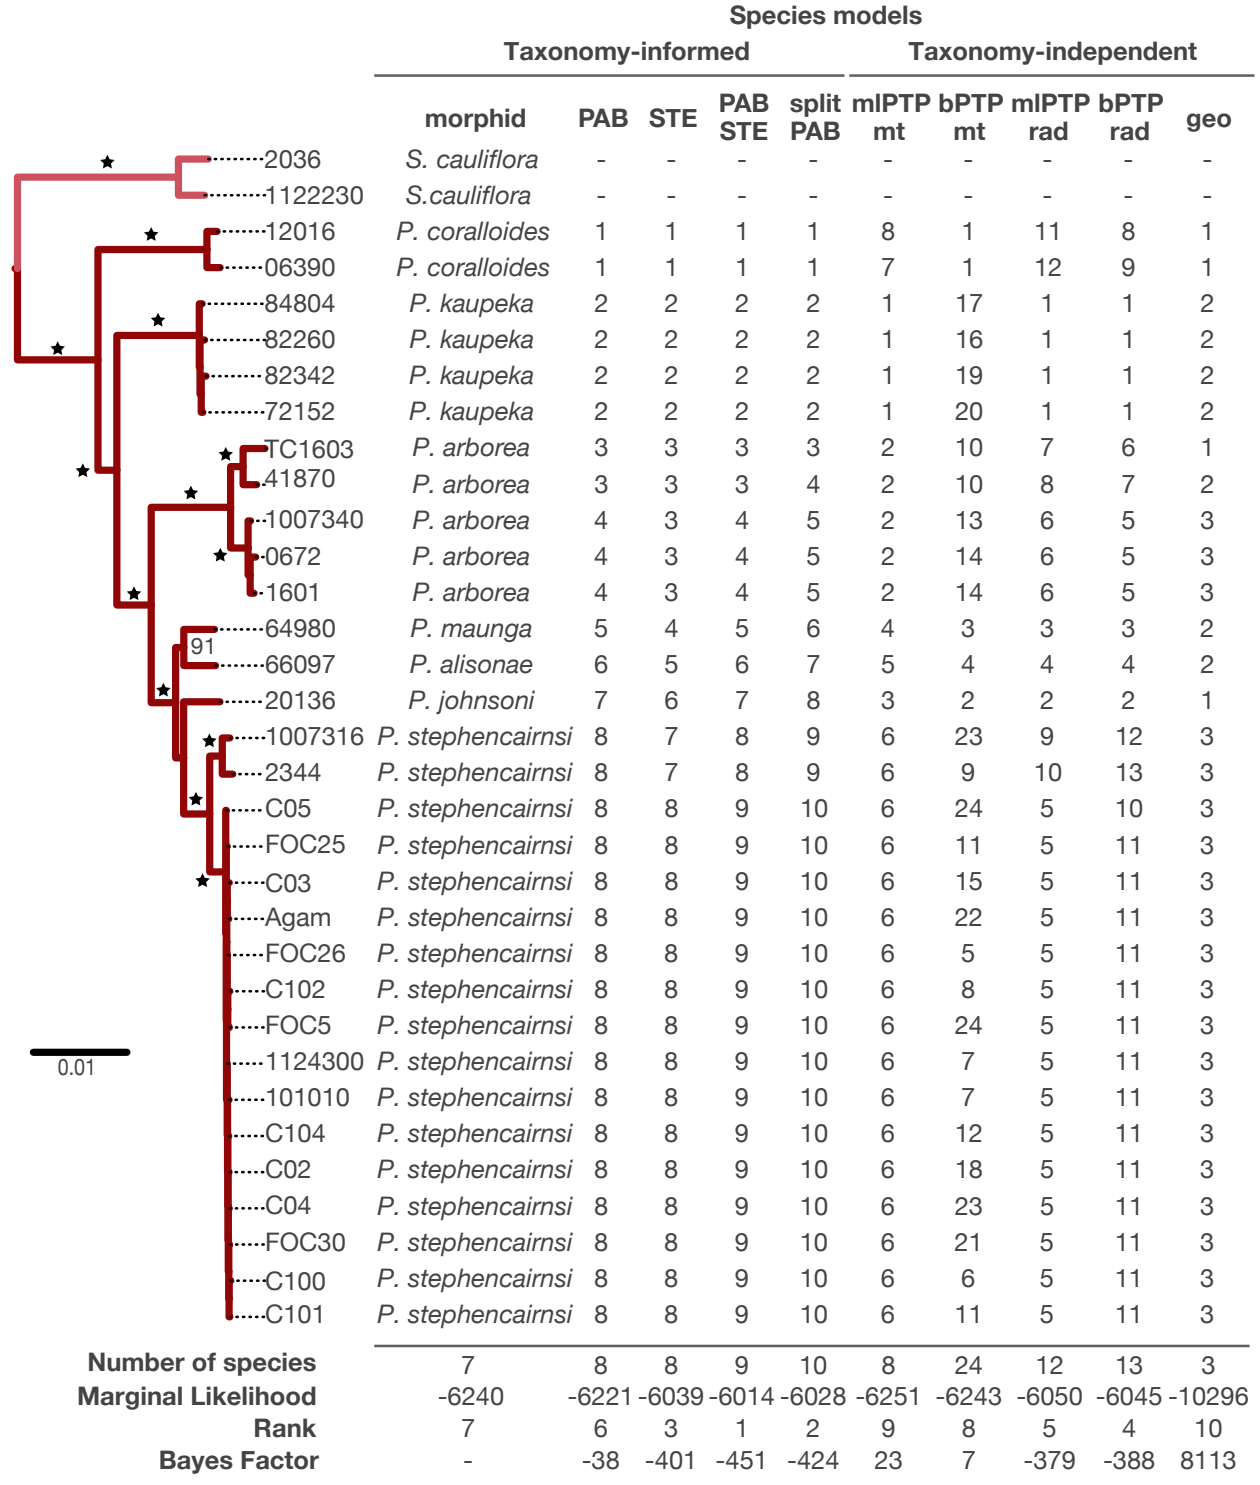

**Figure 3.** Species delineation hypotheses for *Paragorgia*. Table shows the different species delimitation models for *Paragorgia* evaluated with the BFD\* method and their results. *Sibogorgia* was included as outgroup to root the inferences for *Paragorgia*. Each row indicates a different specimen. Each column indicates a different species delimitation model. The first column, model morphid, indicates the species identifications based on morphology.

For all other models, numbers indicate the species assignments. Bottom rows show the total number of species proposed, the marginal likelihood estimate, and rank for each model. The Bayes factor comparisons were calculated with respect to the null morphid model. Phylogenetic tree on the left, shown only for visual reference, was inferred with the RAD-seq concatenated PARAGORGIID matrix in RAxML. Each genus is indicated with a different branch color: pink for *Sibogorgia*; and dark red for *Paragorgia*. Stars on the trees represent bootstrap support of 100. Smaller bootstrap values are indicated in numbers. Scale bar indicates substitutions per site.

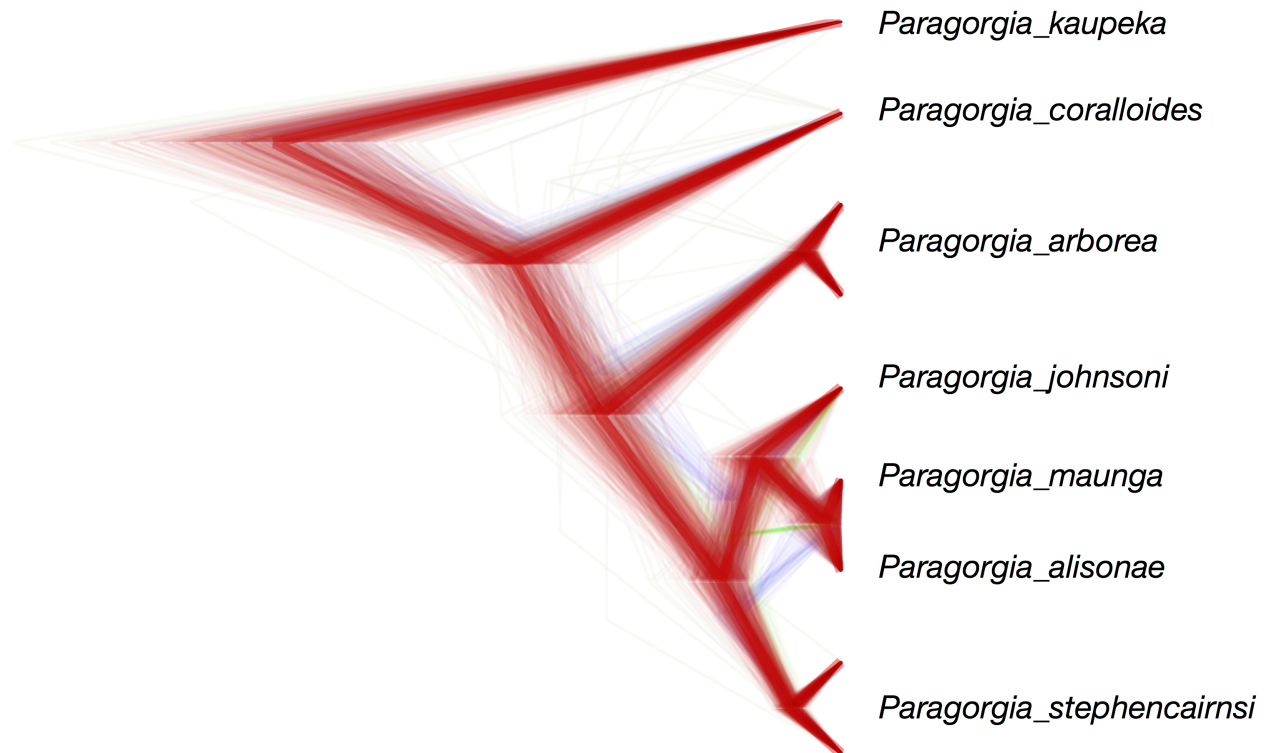

**Figure 4.** Species tree of *Paragorgia*. This cladogram illustrates the posterior distribution of species trees inferred with SNAPP based on the best species delimitation model PABSTE. High color density is indicative of areas in the species trees with high topology agreement. Different colors represent different topologies. The maximum clade credibility species tree is shown with thicker branches. Trees with the same topology as the maximum clade credibility species tree are colored in red. Trees with different topologies are colored green or blue. With the exception of the branch leading to the clade of *P. johnsoni*, *P. maunga*, and *P. alisonae*, which has a posterior probability of 0.87, all interior branches have posterior probabilities of 1.0.



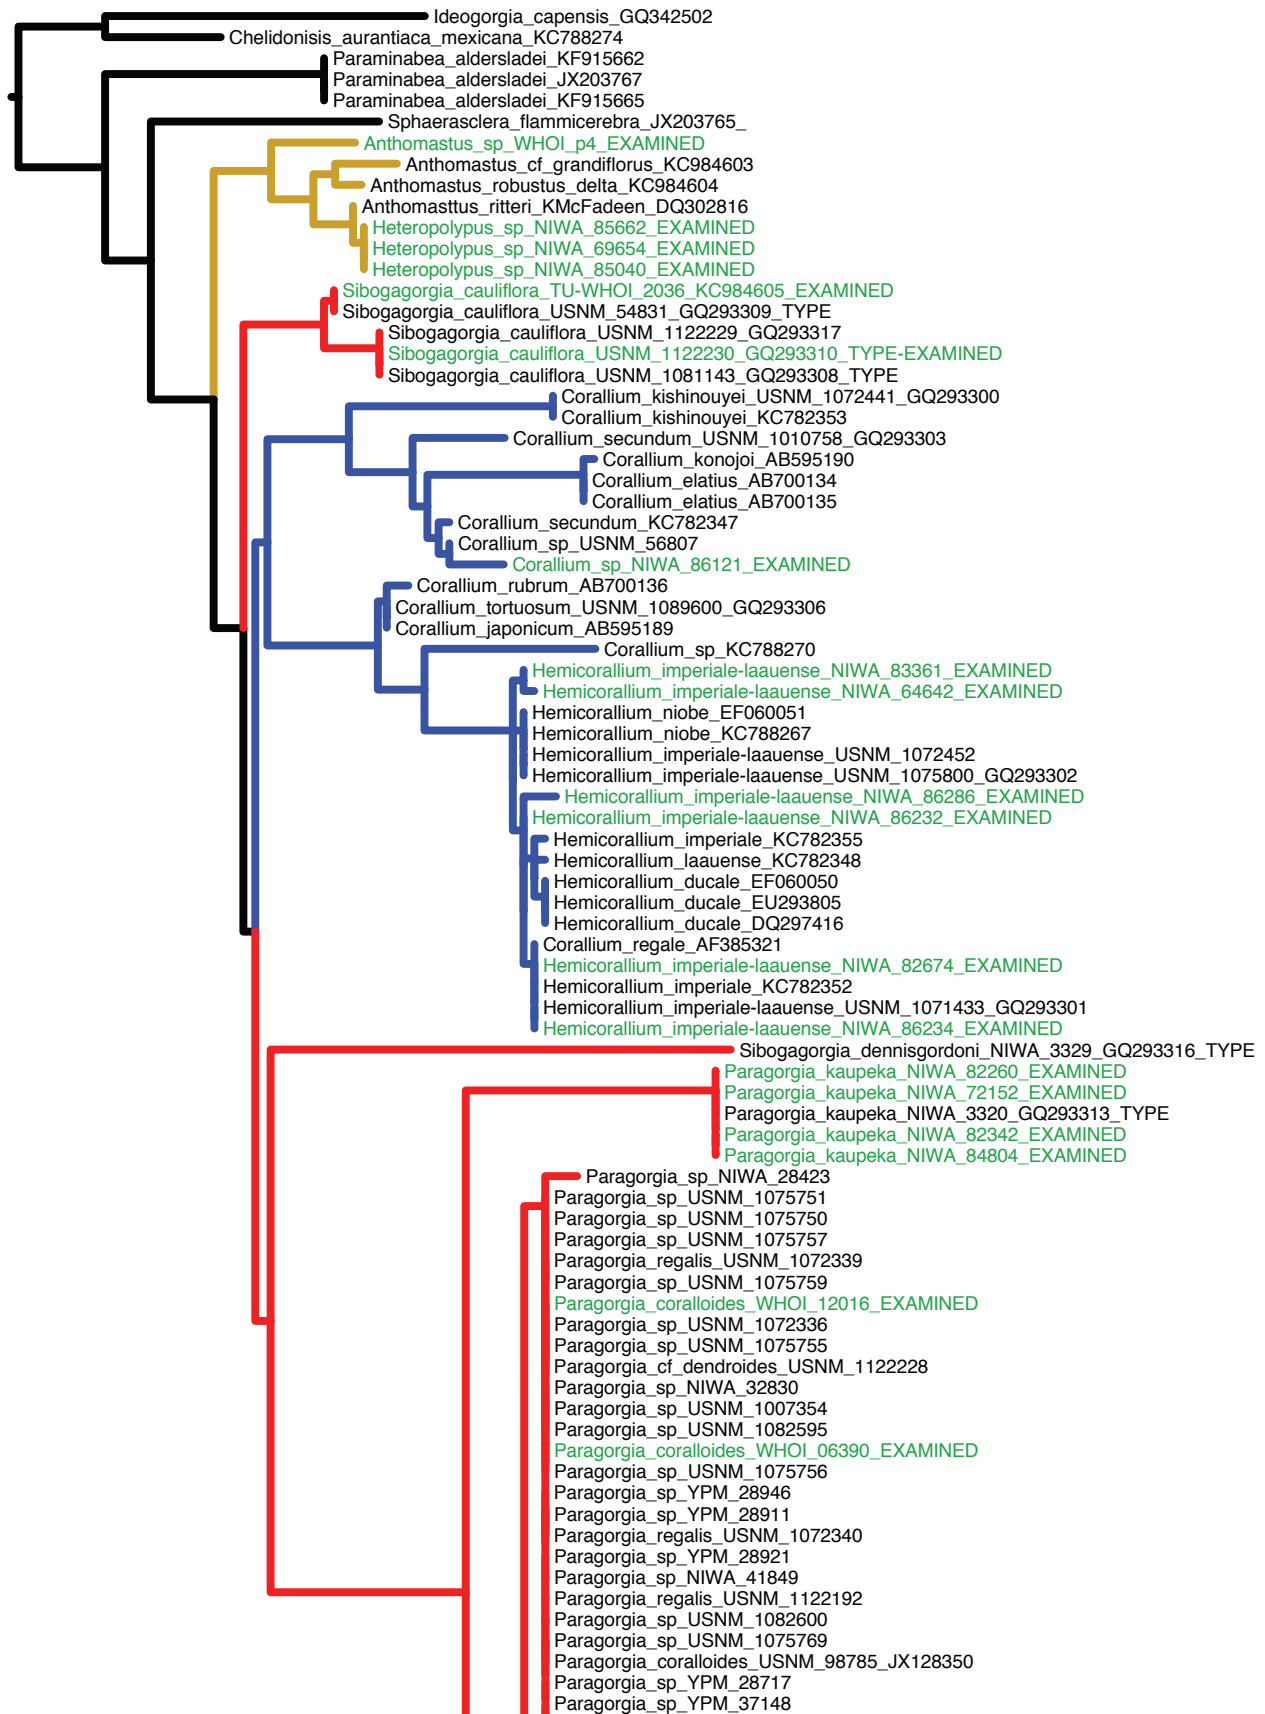

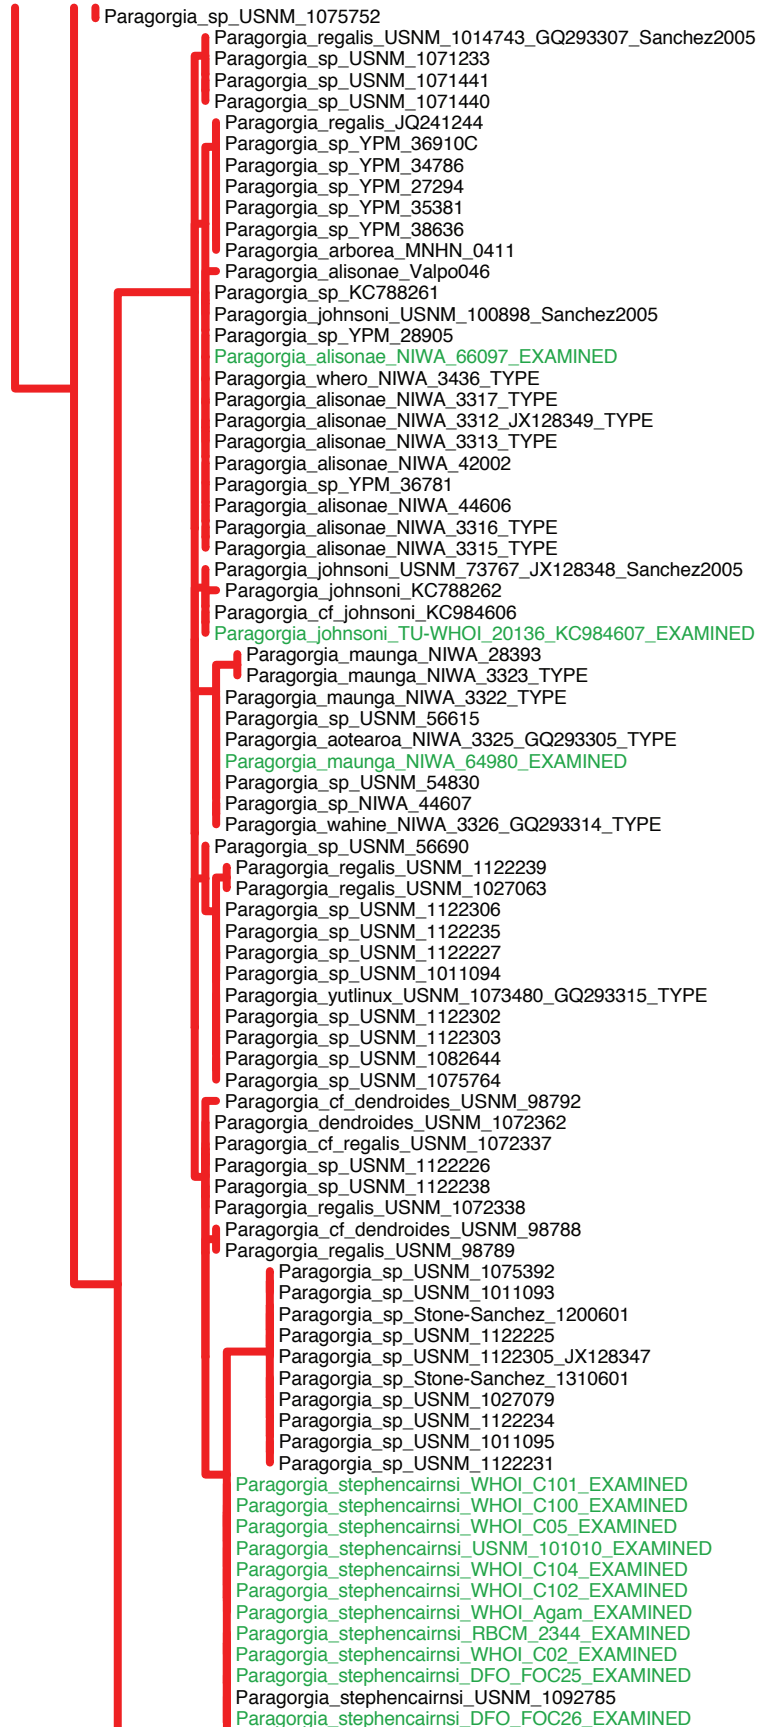

Paragorgia\_stephencairnsi\_DFO\_FOC30\_EXAMINED  
Paragorgia\_stephencairnsi\_USNM\_1123931  
Paragorgia\_stephencairnsi\_USNM\_1075741  
Paragorgia\_stephencairnsi\_DFO\_FOC5\_EXAMINED  
Paragorgia\_stephencairnsi\_USNM\_1124301  
Paragorgia\_stephencairnsi\_USNM\_1124300\_EXAMINED  
Paragorgia\_stephencairnsi\_USNM\_1123930  
Paragorgia\_stephencairnsi\_CAS\_190438  
Paragorgia\_stephencairnsi\_USNM\_1007316\_EXAMINED  
Paragorgia\_stephencairnsi\_WHOI\_C03\_EXAMINED  
Paragorgia\_stephencairnsi\_WHOI\_C04\_EXAMINED  
Paragorgia\_stephencairnsi\_Stone-Sanchez\_200601106B01  
Paragorgia\_stephencairnsi\_USNM\_1124298  
Paragorgia\_stephencairnsi\_USNM\_1122304  
Paragorgia\_arborea\_USNM\_1123936\_JX124532  
Paragorgia\_arborea\_WPMNH\_JX124557  
Paragorgia\_arborea\_USNM\_1123935\_JX124580  
Paragorgia\_arborea\_USNM\_1123934\_JX124555  
Paragorgia\_arborea\_USNM\_1123937\_JX124604  
Paragorgia\_arborea\_USNM\_1011097\_JX124545  
Paragorgia\_arborea\_USNM\_100817\_JX124539  
Paragorgia\_arborea\_USNM\_100846\_JX124538  
Paragorgia\_arborea\_USNM\_1011360\_JX124582  
Paragorgia\_arborea\_USNM\_100758\_JX124584  
Paragorgia\_arborea\_USNM\_100818\_JX124597  
Paragorgia\_arborea\_USNM\_50890\_JX124521  
Paragorgia\_arborea\_USNM\_100843\_JX124529  
Paragorgia\_arborea\_BStone\_ZC0706ROV01\_JX124598  
Paragorgia\_arborea\_USNM\_1123938\_JX124536  
Paragorgia\_arborea\_NIWA\_46318\_JX124583  
Paragorgia\_arborea\_NIWA\_46319\_JX124595  
Paragorgia\_arborea\_NIWA\_42001\_JX124574  
Paragorgia\_arborea\_NIWA\_44609\_JX124534  
Paragorgia\_arborea\_NIWA\_28425\_JX124550  
Paragorgia\_arborea\_NIWA\_46377\_JX124549  
Paragorgia\_arborea\_NIWA\_28160\_JX124523  
Paragorgia\_arborea\_NIWA\_46315\_JX124569  
Paragorgia\_arborea\_NIWA\_76238\_JX124533  
Paragorgia\_arborea\_USNM\_1014919\_JX124578\_Sanchez2005  
Paragorgia\_arborea\_RBCM\_1601\_EXAMINED  
Paragorgia\_arborea\_USNM\_1075745\_JX124602  
Paragorgia\_arborea\_USNM\_1075760\_JX124530  
Paragorgia\_arborea\_AAndrews\_DAVI3\_JX124542  
Paragorgia\_arborea\_USNM\_56389  
Paragorgia\_arborea\_USNM\_1075766\_JX124541  
Paragorgia\_arborea\_USNM\_1016320\_JX124581  
Paragorgia\_arborea\_USNM\_1075753\_JX124527  
Paragorgia\_arborea\_BStone\_20070178B01\_JX124587  
Paragorgia\_arborea\_USNM\_1075761\_JX124576  
Paragorgia\_arborea\_USNM\_1122233\_JX124586  
Paragorgia\_arborea\_USNM\_1075754\_JX124593  
Paragorgia\_arborea\_USNM\_1122237\_JX124590  
Paragorgia\_arborea\_USNM\_1075746\_JX124540  
Paragorgia\_arborea\_USNM\_1122240\_JX124522  
Paragorgia\_arborea\_AAndrews\_DAVI1\_JX124577  
Paragorgia\_arborea\_USNM\_1123932\_JX124524  
Paragorgia\_arborea\_USNM\_1075744\_JX124565  
Paragorgia\_arborea\_USNM\_1007340\_JX124556\_EXAMINED  
Paragorgia\_arborea\_RBCM\_0672\_EXAMINED  
Paragorgia\_arborea\_USNM\_1075738\_JX124526  
Paragorgia\_arborea\_USNM\_1027060\_JX124560  
Paragorgia\_arborea\_USNM\_4091\_JX124579  
Paragorgia\_arborea\_MNHN\_422\_JX124564  
Paragorgia\_arborea\_NIWA\_41780\_JX124558\_EXAMINED  
Paragorgia\_arborea\_USNM\_1092764\_JX124589  
Paragorgia\_arborea\_NIWA\_28123\_JX124546  
Paragorgia\_arborea\_NIWA\_46320\_JX124570  
Paragorgia\_arborea\_USNM\_80937\_GQ293312  
Paragorgia\_arborea\_NIWA\_41854\_JX124611  
Paragorgia\_arborea\_NIWA\_41999\_JX124588  
Paragorgia\_arborea\_USNM\_1120444\_JX124547  
Paragorgia\_arborea\_USNM\_4242\_JX124567  
Paragorgia\_arborea\_USNM\_1092766\_JX124554  
Paragorgia\_arborea\_NIWA\_28422\_JX124601  
Paragorgia\_arborea\_NIWA\_3309\_JX124535\_Sanchez2005  
Paragorgia\_arborea\_NIWA\_3308\_JX124552\_Sanchez2005  
Paragorgia\_arborea\_NIWA\_46316\_JX124573  
Paragorgia\_arborea\_NIWA\_3310\_GQ293311\_Sanchez2005  
Paragorgia\_arborea\_USNM\_80936\_JX124543  
Paragorgia\_arborea\_NIWA\_28156\_JX124610  
Paragorgia\_arborea\_NIWA\_28154\_JX124553

Paragorgia\_arborea\_NIWA\_28158\_JX124566  
Paragorgia\_arborea\_USNM\_80838\_JX124544  
Paragorgia\_arborea\_NIWA\_17971\_JX124592  
Paragorgia\_arborea\_NIWA\_17970\_JX124605  
Paragorgia\_arborea\_MCZ\_28697\_JX124561  
Paragorgia\_arborea\_NIWA\_41829\_JX124585  
Paragorgia\_arborea\_WHOI\_03CAN\_EXAMINED  
Paragorgia\_arborea\_NIWA\_17969\_JX124607  
Paragorgia\_arborea\_MCZ\_51244\_JX124600  
Paragorgia\_arborea\_NIWA\_44608\_JX124537  
Paragorgia\_arborea\_USNM\_1010787\_JX124528  
Paragorgia\_arborea\_NIWA\_46314\_JX124594  
Paragorgia\_arborea\_MNHN\_412\_JX124609  
Paragorgia\_arborea\_USNM\_33560\_JX124572  
Paragorgia\_arborea\_NIWA\_3311\_JX124525\_Sanchez2005  
Paragorgia\_arborea\_USNM\_33561\_JX124562  
Paragorgia\_arborea\_NIWA\_46317\_JX124603  
Paragorgia\_arborea\_USNM\_4238\_JX124608  
Paragorgia\_arborea\_USNM\_4089\_JX124591  
Paragorgia\_arborea\_USNM\_1092765\_JX124520  
Paragorgia\_arborea\_USNM\_4569\_JX124596  
Paragorgia\_arborea\_MCZ\_15721\_JX124606  
Paragorgia\_arborea\_NIWA\_25527\_JX124548  
Paragorgia\_arborea\_USNM\_33559\_JX124559  
Paragorgia\_arborea\_NIWA\_28392\_JX124575  
Paragorgia\_arborea\_MCZ\_28057\_JX124551  
Paragorgia\_arborea\_NIWA\_28161\_JX124568\_Sanchez2005  
Paragorgia\_arborea\_NIWA\_44156\_JX124563  
Paragorgia\_arborea\_NIWA\_28157\_JX124531

0.02

**Figure S2.** Mitochondrial *mtMutS* gene tree of all available sequences for the clade AC. Tree inferred from *mtMutS* sequence data from specimens examined in this study, GenBank, and additional specimens. Each family is indicated with a different branch color: red for Paragorgiidae; blue for Coralliidae; and yellow for Alcyoniidae. Outgroups are indicated with black branches. Specimens examined in detail in this study are indicated with green labels. Type specimens are labeled TYPE. Specimens examined in Sanchez (2005) are labeled “Sanchez2005”. Tree was inferred with RAxML. Scale bars indicate substitutions per site.

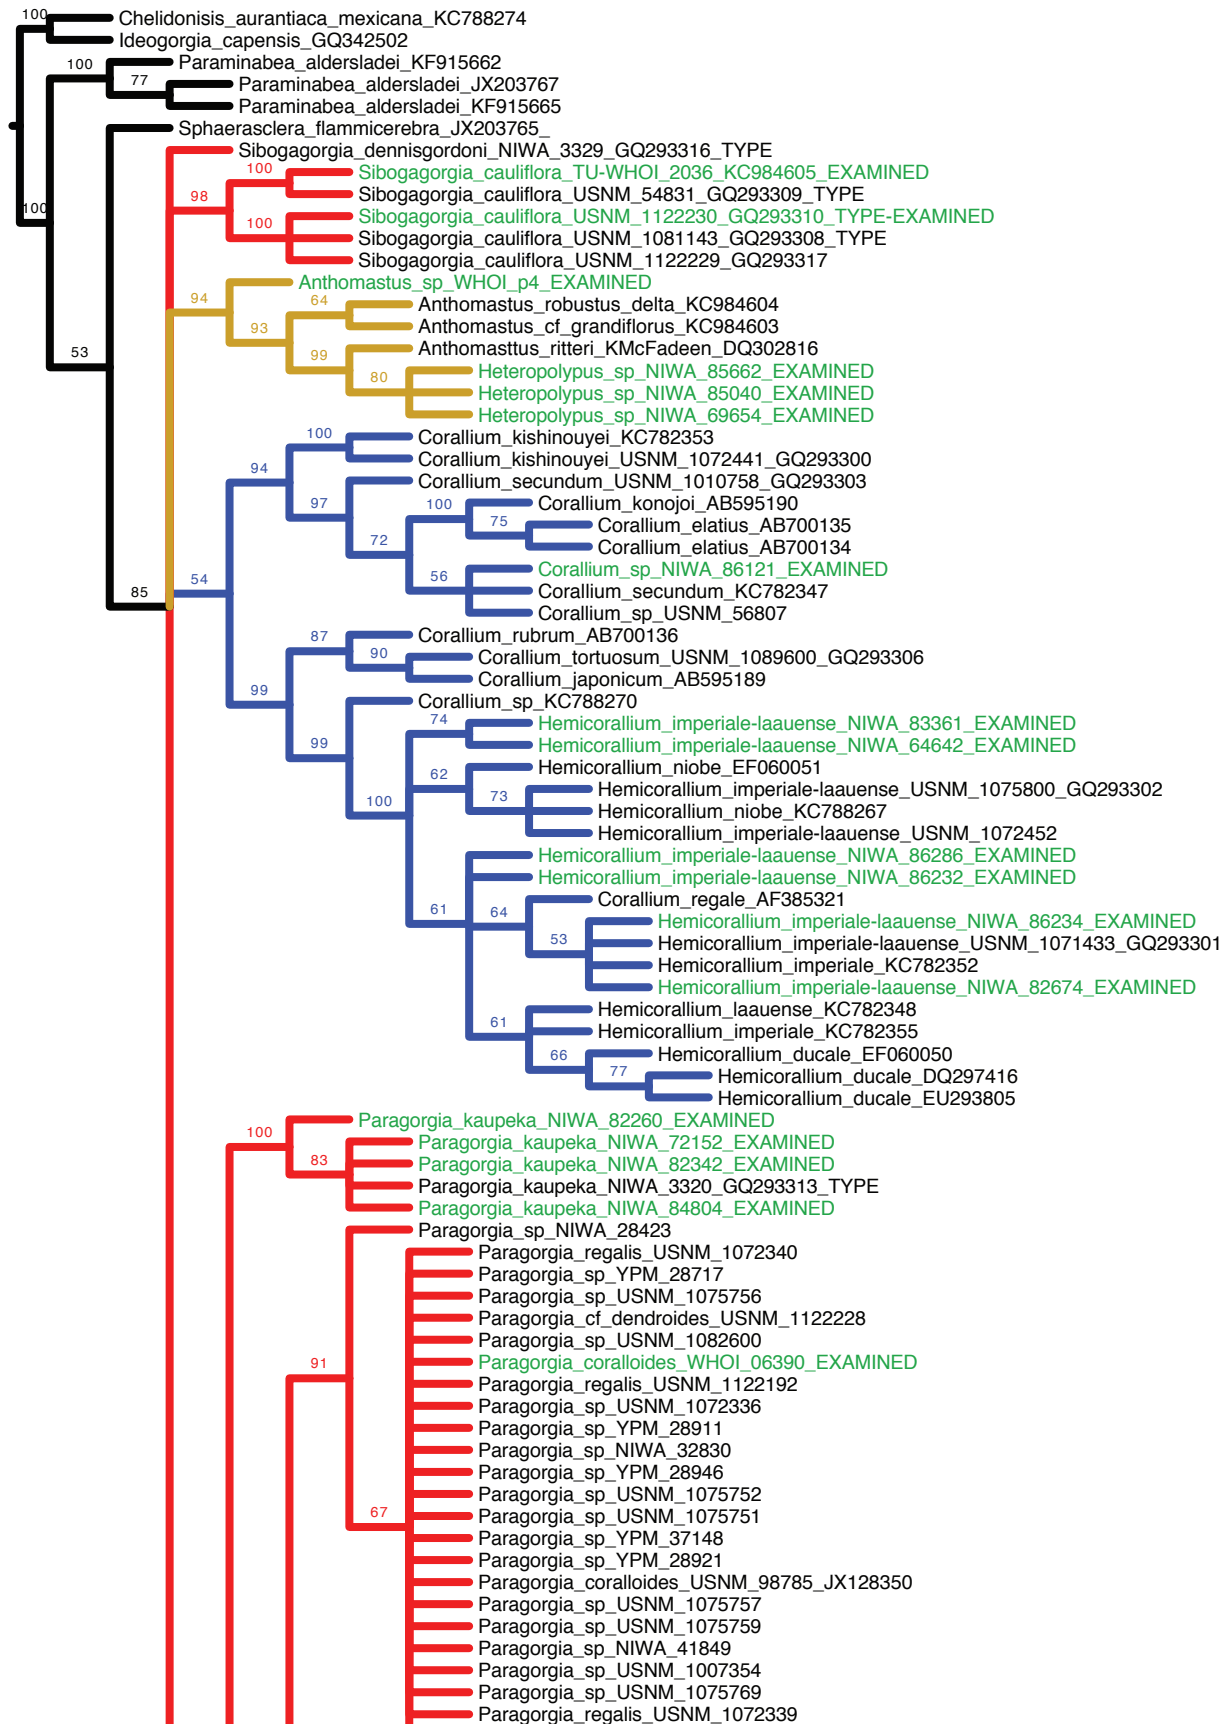



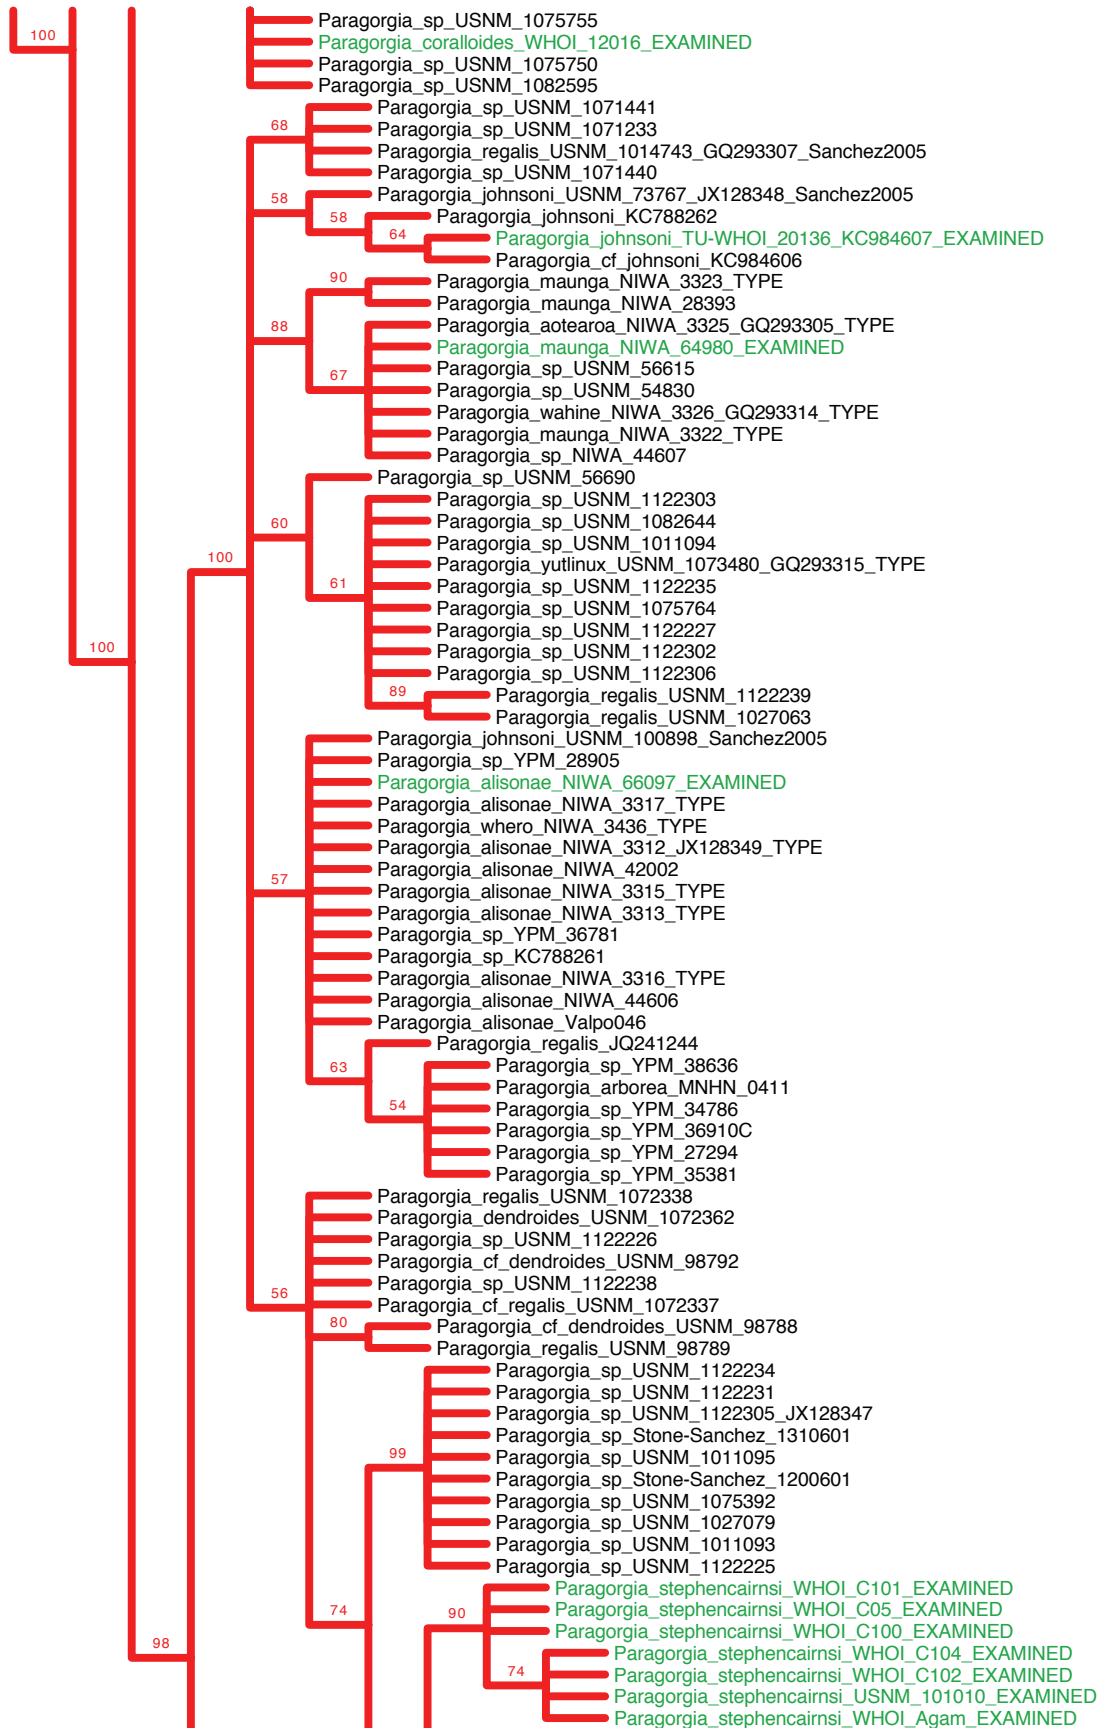

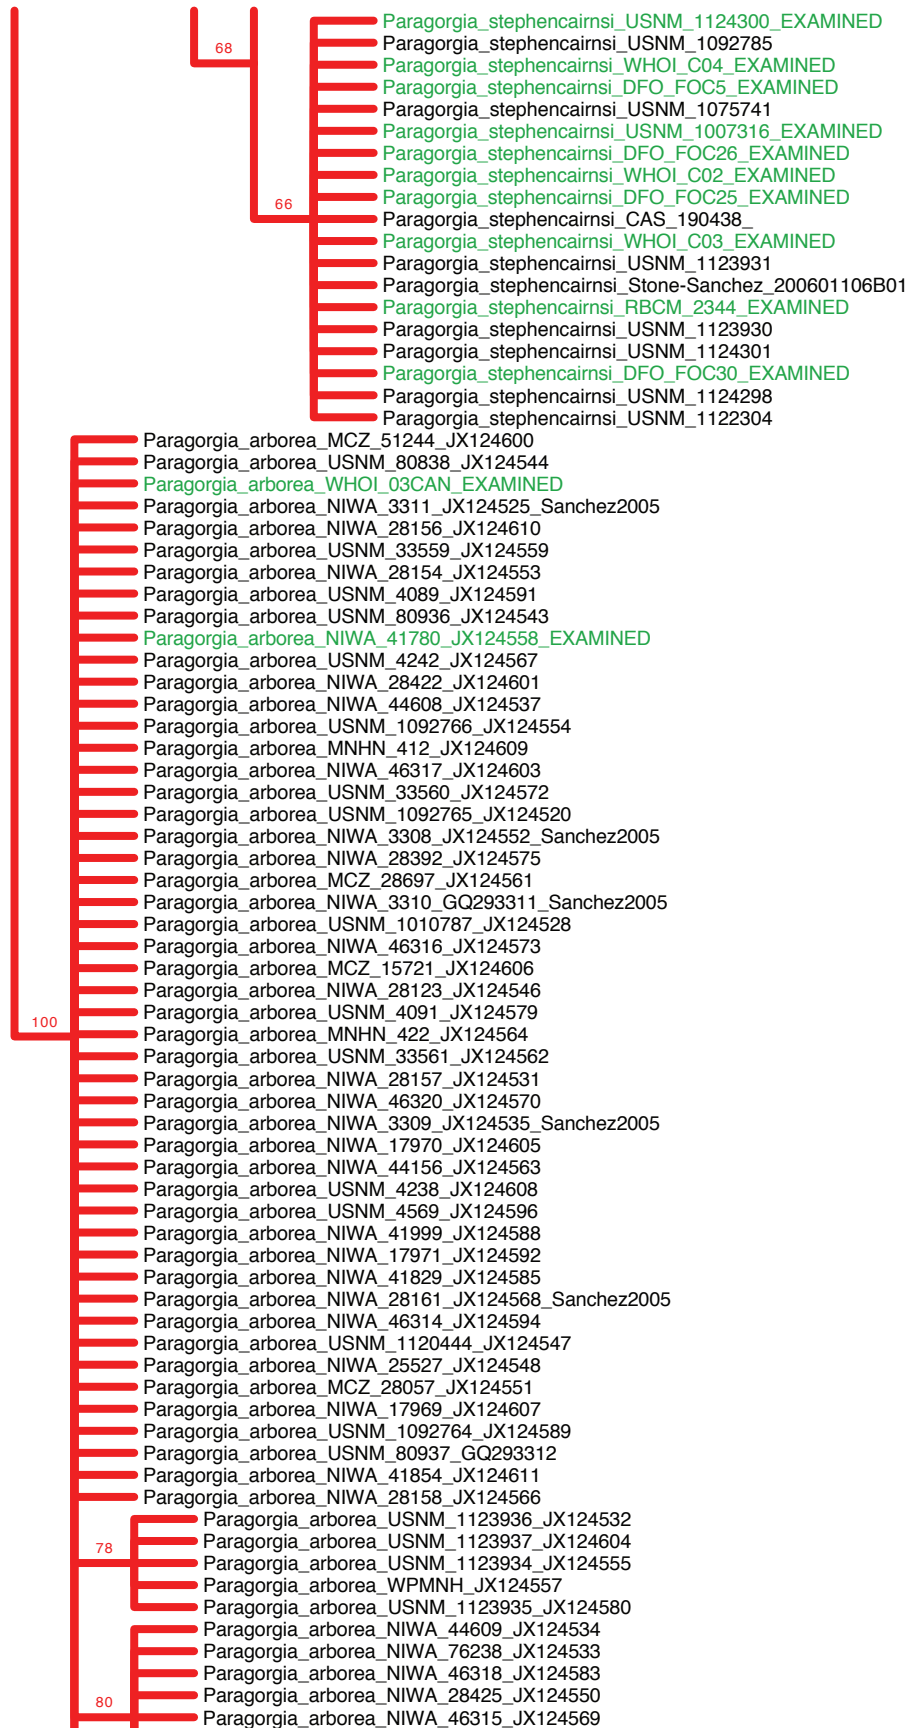

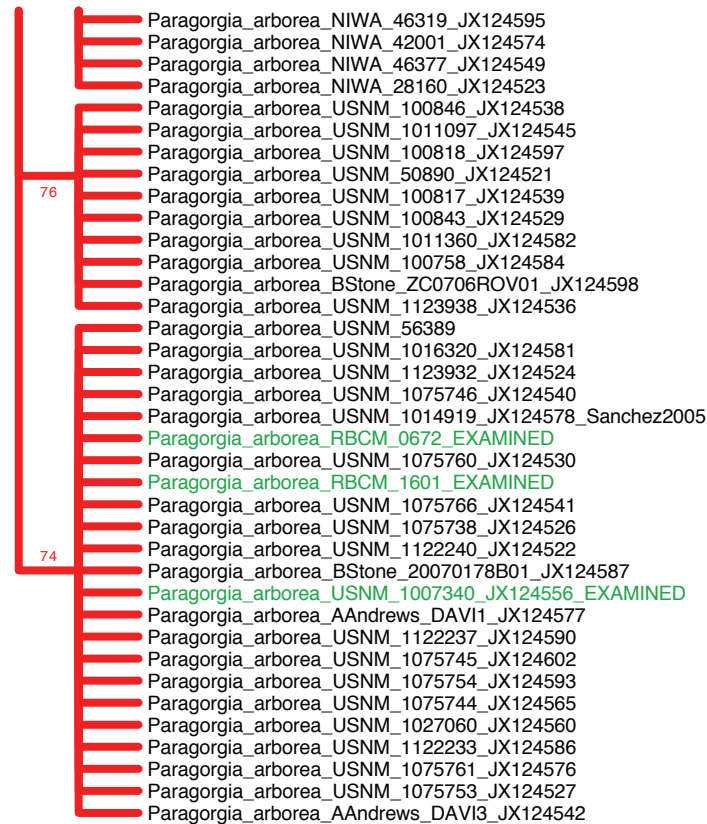

**Figure S3.** Mitochondrial *mtMutS* bootstrap support consensus tree of all available sequences for the clade AC. Tree inferred from *mtMutS* sequence data from specimens examined in this study, GenBank, and additional specimens. Each family is indicated with a different branch color: red for Paragorgiidae; blue for Coralliidae; and yellow for Alcyoniidae. Outgroups are indicated with black branches. Specimens examined in detail in this study are indicated with green labels. Type specimens are labeled “TYPE”. Specimens examined in Sanchez (2005) are labeled “Sanchez2005”. Tree was created with RAxML using a 50% majority consensus from 500 bootstrap replicates.

**Table S1.** Collection and sequence information for the specimens used in this study.

| ID      | Morphological Species                    | Delimitation model PABSTE | Collection | Date Collected | Locality                                                              | Depth (m) | Lat.   | Lon.    |
|---------|------------------------------------------|---------------------------|------------|----------------|-----------------------------------------------------------------------|-----------|--------|---------|
| p4      | <i>Anthomastus sp</i>                    |                           | WHOI       | 2011           | Patagonian shelf                                                      | 380       | -30.19 | 179.72  |
| 86121   | <i>Corallium sp</i>                      |                           | NIWA       | 2012           | Kermadec Ridge; Colville ridge volcano; TAN1213/18                    | 1050      | -35.42 | 178.65  |
| 64642   | <i>Hemicorallium imperiale-laauiense</i> |                           | NIWA       | 2010           | Kermadec Ridge; Rumble II East seamount cone; TAN1007/97              | 948       | -37.19 | 176.98  |
| 83361   | <i>Hemicorallium imperiale-laauiense</i> |                           | NIWA       | 2012           | Bay of Plenty; Site SM1b, Matatara Knoll; TAN1206/168                 | 878       | -36.81 | 177.47  |
| 82674   | <i>Hemicorallium imperiale-laauiense</i> |                           | NIWA       | 2012           | Kermadec Ridge; Site SM2aa, summit of Whakatane Seamount; TAN1206/77  | 483       | -30.08 | 179.82  |
| 86234   | <i>Hemicorallium imperiale-laauiense</i> |                           | NIWA       | 2012           | Kermadec Ridge; Northeast pimple volcano; TAN1213/22                  | 860       | -31.13 | -179.05 |
| 86286   | <i>Hemicorallium imperiale-laauiense</i> |                           | NIWA       | 2012           | Kermadec Ridge; Havre volcano; TAN1213/30                             | 483       | -30.08 | 179.82  |
| 86232   | <i>Hemicorallium imperiale-laauiense</i> |                           | NIWA       | 2012           | Kermadec Ridge; Northeast pimple volcano; TAN1213/22                  | 495       | -44.33 | -177.22 |
| 69654   | <i>Heteropolypus sp</i>                  |                           | NIWA       | 2011           | Chatam Rise; TRIP3306/78                                              | 2098      | -42.59 | 179.42  |
| 85040   | <i>Heteropolypus sp</i>                  |                           | NIWA       | 2012           | Chatam Rise; TAN1208/22                                               | 1931      | -42.59 | 179.59  |
| 85662   | <i>Heteropolypus sp</i>                  |                           | NIWA       | 2012           | Chatam Rise; TAN1208/61                                               | 875       | -50.02 | 175.00  |
| 66097   | <i>Paragorgia alisonae</i>               | <i>P. alisonae</i>        | NIWA       | 2008           | Cambell Plateau; TRIP2718/50                                          | 600       | -44.52 | 175.78  |
| 41780   | <i>Paragorgia arborea</i>                | <i>P. arborea</i>         | NIWA       | 2008           | Chatam Rise; TRIP2617/120                                             | 540       | 40.54  | -67.01  |
| TC16_03 | <i>Paragorgia arborea</i>                | <i>P. arborea</i>         | WHOI       | 2013           | NE US Canyons; Munson Canyon; TowCam 16                               |           |        |         |
| 0672    | <i>Paragorgia arborea</i>                | <i>P. pacifica</i>        | RBCM       | 2004           | British Columbia; VE14280                                             | 1168      | 48.44  | -126.38 |
| 1007340 | <i>Paragorgia arborea</i>                | <i>P. pacifica</i>        | USNM       | 2001           | British Columbia; Vancouver Island                                    | 695       | 53.31  | -135.58 |
| 1601    | <i>Paragorgia arborea</i>                | <i>P. pacifica</i>        | RBCM       | 2009           | British Columbia; VE14444                                             | 1821      | 37.46  | -59.95  |
| 063902  | <i>Paragorgia coralloides</i>            | <i>P. coralloides</i>     | WHOI       | 2005           | New England Seamounts; Rehobot Seamount; H13                          | 2000      | 38.23  | -60.46  |
| 12016   | <i>Paragorgia coralloides</i>            | <i>P. coralloides</i>     | WHOI       | 2003           | New England Seamounts; Manning Seamount, station 4; AD3890            | 438       | 28.19  | -89.80  |
| 20136   | <i>Paragorgia johnsoni</i>               | <i>P. johnsoni</i>        | TU/WHOI    | 2009           | Gulf of Mexico; MC751; J2-464                                         | 877       | -36.45 | 177.84  |
| 72152   | <i>Paragorgia kaupeka</i>                | <i>P. kaupeka</i>         | NIWA       | 2011           | Kermadec Ridge; Clark Seamount, chimney field, north cone; TAN1104/13 | 850       | -36.45 | 177.84  |
| 82260   | <i>Paragorgia kaupeka</i>                | <i>P. kaupeka</i>         | NIWA       | 2012           | Kermadec Ridge; Site SM3a, summit of Clark Seamount; TAN1206/34       | 1100      | -36.45 | 177.84  |
| 82342   | <i>Paragorgia kaupeka</i>                | <i>P. kaupeka</i>         | NIWA       | 2012           | Kermadec Ridge; Site SM3a, Clark Seamount; TAN1206/40                 | 870       | -36.45 | 177.84  |
| 84804   | <i>Paragorgia kaupeka</i>                | <i>P. kaupeka</i>         | NIWA       | 2005           | Kermadec Ridge; Clark Seamount; KOK0506/12                            | 772       | -35.17 | 178.89  |
| 64980   | <i>Paragorgia maunga</i>                 | <i>P. maunga</i>          | NIWA       | 2010           | Kermadec Ridge; Silent II seamount; TAN1007/120                       | 1168      | 48.44  | -126.38 |
| 1007316 | <i>Paragorgia stephencairnsi</i>         | <i>P. sp. nov</i>         | USNM       | 2001           | British Columbia; Vancouver Island                                    | 1194      | 53.37  | -133.31 |
| 2344    | <i>Paragorgia stephencairnsi</i>         | <i>P. sp. nov</i>         | RBCM       | 2004           | British Columbia; VE13978                                             |           |        |         |

|         |                                  |                          |         |      |                                                             |      |       |         |
|---------|----------------------------------|--------------------------|---------|------|-------------------------------------------------------------|------|-------|---------|
| 101010  | <i>Paragorgia stephencairnsi</i> | <i>P. stephencairnsi</i> | USNM    | 2008 | California; Piggy Bank, southern California; DW-026-02      | 283  | 33.92 | -119.47 |
| 1124300 | <i>Paragorgia stephencairnsi</i> | <i>P. stephencairnsi</i> | USNM    | 2006 | British Columbia; Vancouver Island, Ohiat Island; OC 06/952 | 188  | 48.83 | -125.13 |
| Agam    | <i>Paragorgia stephencairnsi</i> | <i>P. stephencairnsi</i> | WHOI    | 2012 | British Columbia; Agamemnon Channel                         | 32   | 49.72 | -124.05 |
| C02     | <i>Paragorgia stephencairnsi</i> | <i>P. stephencairnsi</i> | WHOI    | 2013 | British Columbia; Agamemnon Channel; Dive02                 | 41   | 49.74 | -124.03 |
| C03     | <i>Paragorgia stephencairnsi</i> | <i>P. stephencairnsi</i> | WHOI    | 2013 | British Columbia; Agamemnon Channel; Dive02                 | 41   | 49.74 | -124.03 |
| C04     | <i>Paragorgia stephencairnsi</i> | <i>P. stephencairnsi</i> | WHOI    | 2013 | British Columbia; Agamemnon Channel; Dive02                 | 41   | 49.74 | -124.03 |
| C05     | <i>Paragorgia stephencairnsi</i> | <i>P. stephencairnsi</i> | WHOI    | 2013 | British Columbia; Agamemnon Channel; Dive02                 | 41   | 49.74 | -124.03 |
| C100    | <i>Paragorgia stephencairnsi</i> | <i>P. stephencairnsi</i> | WHOI    | 2013 | British Columbia; Vancouver Island, Tahsis Inlet; Dive07    | 40   | 49.86 | -126.67 |
| C101    | <i>Paragorgia stephencairnsi</i> | <i>P. stephencairnsi</i> | WHOI    | 2013 | British Columbia; Vancouver Island, Tahsis Inlet; Dive07    | 40   | 49.86 | -126.67 |
| C102    | <i>Paragorgia stephencairnsi</i> | <i>P. stephencairnsi</i> | WHOI    | 2013 | British Columbia; Vancouver Island, Tahsis Inlet; Dive07    | 40   | 49.86 | -126.67 |
| C104    | <i>Paragorgia stephencairnsi</i> | <i>P. stephencairnsi</i> | WHOI    | 2013 | British Columbia; Vancouver Island, Tahsis Inlet; Dive07    | 40   | 49.86 | -126.67 |
| FOC25   | <i>Paragorgia stephencairnsi</i> | <i>P. stephencairnsi</i> | DFO     | 2012 | British Columbia; W of Graham Island; 2012-65               | 204  | 53.31 | -133.03 |
| FOC26   | <i>Paragorgia stephencairnsi</i> | <i>P. stephencairnsi</i> | DFO     | 2012 | British Columbia; W of Graham Island; 2012-65               | 221  | 53.30 | -133.04 |
| FOC30   | <i>Paragorgia stephencairnsi</i> | <i>P. stephencairnsi</i> | DFO     | 2012 | British Columbia; W of Graham Island; 2012-65               | 318  | 53.48 | -133.07 |
| FOC5    | <i>Paragorgia stephencairnsi</i> | <i>P. stephencairnsi</i> | DFO     | 2009 | British Columbia; E of Graham Island; 2009-47               | 201  | 52.13 | -128.90 |
| 1122230 | <i>Sibogorgia cauliflora</i>     |                          | USNM    | 2006 | California; Davidson seamount; dive 945                     | 2502 | 35.83 | -122.61 |
| 2036    | <i>Sibogorgia cauliflora</i>     |                          | TU/WHOI | 2009 | Gulf of Mexico; DC583; J2-454                               | 2440 | 28.39 | -87.39  |

**Table S2.** RAD sequencing results and filtering statistics.

| Morphological Species         | Delimitation model       | RAD-seq data file ID | Total sequenced reads | STACKS filtering                   |                | pyRAD filtering                     |                                            |                                |                                           |
|-------------------------------|--------------------------|----------------------|-----------------------|------------------------------------|----------------|-------------------------------------|--------------------------------------------|--------------------------------|-------------------------------------------|
|                               |                          |                      |                       | Reads discarded due to low quality | Retained reads | Reads that passed quality filtering | Trimmed reads due to detection of adapters | Total number of retained reads | % of retained reads after filtering steps |
| <i>Anthomastus sp</i>         |                          | PoC_p4_ARG           | 2,207,834             | 151,391                            | 1,312,903      | 1,076,607                           | 38,570                                     | 1,115,177                      | 50.51                                     |
| <i>Corallium sp</i>           |                          | COR_86121_NZ         | 3,826,317             | 305,019                            | 3,013,324      | 2,555,644                           | 22,650                                     | 2,578,294                      | 67.38                                     |
| <i>H. imperiale-laaauense</i> |                          | COR_64642_NZ         | 4,344,702             | 239,625                            | 4,105,077      | 3,697,256                           | 21,823                                     | 3,719,079                      | 85.60                                     |
| <i>H. imperiale-laaauense</i> |                          | COR_83361_NZ         | 3,351,944             | 291,963                            | 2,588,492      | 2,103,039                           | 37,016                                     | 2,140,055                      | 63.85                                     |
| <i>H. imperiale-laaauense</i> |                          | HEM_82674_NZ         | 4,455,288             | 364,162                            | 3,777,461      | 3,216,577                           | 40,911                                     | 3,257,488                      | 73.12                                     |
| <i>H. imperiale-laaauense</i> |                          | HEM_86234_NZ         | 2,408,325             | 186,372                            | 2,142,057      | 1,876,187                           | 16,195                                     | 1,892,382                      | 78.58                                     |
| <i>H. imperiale-laaauense</i> |                          | HEM_86286_NZ         | 5,324,532             | 446,268                            | 4,266,674      | 3,577,980                           | 42,661                                     | 3,620,641                      | 68.00                                     |
| <i>H. imperiale-laaauense</i> |                          | PAR_86232_NZ         | 6,092,276             | 503,438                            | 5,206,376      | 4,454,042                           | 35,518                                     | 4,489,560                      | 73.69                                     |
| <i>Heteropolypus sp</i>       |                          | ANT_69654_NZ         | 4,300,289             | 349,226                            | 3,645,814      | 3,139,309                           | 32,395                                     | 3,171,704                      | 73.76                                     |
| <i>Heteropolypus sp</i>       |                          | ANT_85040_NZ         | 4,498,336             | 393,748                            | 3,882,304      | 3,333,172                           | 26,687                                     | 3,359,859                      | 74.69                                     |
| <i>Heteropolypus sp</i>       |                          | ANT_85662_NZ         | 3,487,138             | 283,856                            | 2,812,750      | 2,382,184                           | 40,135                                     | 2,422,319                      | 69.46                                     |
| <i>P. alisonae</i>            | <i>P. alisonae</i>       | PAR_66097_NZ         | 3,007,362             | 220,209                            | 2,511,717      | 2,219,265                           | 21,207                                     | 2,240,472                      | 74.50                                     |
| <i>P. arborea</i>             | <i>P. arborea</i>        | PAR_41780_NZ         | 6,668,080             | 367,144                            | 6,300,936      | 5,655,328                           | 33,758                                     | 5,689,086                      | 85.32                                     |
| <i>P. arborea</i>             | <i>P. arborea</i>        | PAR_TC16_03_CAN      | 2,259,880             | 167,106                            | 1,799,244      | 1,556,363                           | 17,448                                     | 1,573,811                      | 69.64                                     |
| <i>P. arborea</i>             | <i>P. pacifica</i>       | PAR_0672_BC          | 4,348,226             | 293,526                            | 4,054,700      | 3,543,642                           | 29,284                                     | 3,572,926                      | 82.17                                     |
| <i>P. arborea</i>             | <i>P. pacifica</i>       | PAR_1007340_BCD      | 2,808,882             | 251,102                            | 2,431,829      | 2,063,940                           | 25,831                                     | 2,089,771                      | 74.40                                     |
| <i>P. arborea</i>             | <i>P. pacifica</i>       | PAR_1601_BC          | 4,202,185             | 221,386                            | 3,980,799      | 3,606,334                           | 25,434                                     | 3,631,768                      | 86.43                                     |
| <i>P. coralloides</i>         | <i>P. coralloides</i>    | PAR_063902_NES       | 3,244,860             | 185,122                            | 3,059,738      | 2,746,228                           | 20,408                                     | 2,766,636                      | 85.26                                     |
| <i>P. coralloides</i>         | <i>P. coralloides</i>    | PAR_12016_NES        | 3,838,375             | 226,253                            | 3,612,122      | 3,255,440                           | 15,945                                     | 3,271,385                      | 85.23                                     |
| <i>P. johnsoni</i>            | <i>P. johnsoni</i>       | PAR_20136_GOM        | 7,751,624             | 422,203                            | 7,329,421      | 6,623,446                           | 38,692                                     | 6,662,138                      | 85.95                                     |
| <i>P. kaupeka</i>             | <i>P. kaupeka</i>        | PAR_72152_NZ         | 3,909,139             | 268,871                            | 2,926,960      | 2,531,796                           | 26,984                                     | 2,558,780                      | 65.46                                     |
| <i>P. kaupeka</i>             | <i>P. kaupeka</i>        | PAR_82260_NZ         | 5,511,873             | 475,292                            | 4,558,291      | 3,824,683                           | 42,782                                     | 3,867,465                      | 70.17                                     |
| <i>P. kaupeka</i>             | <i>P. kaupeka</i>        | PAR_82342_NZ         | 4,056,319             | 307,425                            | 3,339,653      | 2,866,786                           | 33,020                                     | 2,899,806                      | 71.49                                     |
| <i>P. kaupeka</i>             | <i>P. kaupeka</i>        | PAR_84804_NZ         | 2,828,879             | 230,493                            | 2,313,997      | 1,968,495                           | 19,602                                     | 1,988,097                      | 70.28                                     |
| <i>P. maunga</i>              | <i>P. maunga</i>         | PAR_11369_NZ         | 2,536,311             | 252,554                            | 2,008,028      | 1,619,915                           | 34,477                                     | 1,654,392                      | 65.23                                     |
| <i>P. stephencairnsi</i>      | <i>P. sp. nov</i>        | PAR_1007316_BCD      | 2,257,183             | 151,729                            | 1,606,180      | 1,371,398                           | 36,692                                     | 1,408,090                      | 62.38                                     |
| <i>P. stephencairnsi</i>      | <i>P. sp. nov</i>        | PAR_2344_BC          | 2,858,311             | 159,073                            | 2,699,238      | 2,414,787                           | 26,272                                     | 2,441,059                      | 85.40                                     |
| <i>P. stephencairnsi</i>      | <i>P. stephencairnsi</i> | PAR_101010_CA        | 6,642,673             | 398,317                            | 6,244,356      | 5,595,342                           | 39,240                                     | 5,634,582                      | 84.82                                     |
| <i>P. stephencairnsi</i>      | <i>P. stephencairnsi</i> | PAR_1124300_WA       | 3,843,250             | 215,859                            | 3,627,391      | 3,260,864                           | 27,921                                     | 3,288,785                      | 85.57                                     |
| <i>P. stephencairnsi</i>      | <i>P. stephencairnsi</i> | PAR_Agam_BC          | 4,322,564             | 260,095                            | 4,062,469      | 3,619,988                           | 26,669                                     | 3,646,657                      | 84.36                                     |

|                          |                          |                 |           |         |           |           |        |           |       |
|--------------------------|--------------------------|-----------------|-----------|---------|-----------|-----------|--------|-----------|-------|
| <i>P. stephencairnsi</i> | <i>P. stephencairnsi</i> | PAR_C02_BCS     | 2,149,938 | 153,978 | 1,594,818 | 1,377,002 | 16,157 | 1,393,159 | 64.80 |
| <i>P. stephencairnsi</i> | <i>P. stephencairnsi</i> | PAR_C03_BCS     | 2,815,327 | 245,051 | 2,264,951 | 1,916,452 | 19,800 | 1,936,252 | 68.78 |
| <i>P. stephencairnsi</i> | <i>P. stephencairnsi</i> | PAR_C04_BCS     | 3,240,713 | 267,042 | 2,754,373 | 2,379,284 | 22,261 | 2,401,545 | 74.11 |
| <i>P. stephencairnsi</i> | <i>P. stephencairnsi</i> | PAR_C05_BCS     | 3,465,396 | 294,547 | 2,972,548 | 2,538,577 | 25,005 | 2,563,582 | 73.98 |
| <i>P. stephencairnsi</i> | <i>P. stephencairnsi</i> | PAR_C100_BCS    | 5,998,914 | 480,465 | 4,984,766 | 4,330,930 | 38,445 | 4,369,375 | 72.84 |
| <i>P. stephencairnsi</i> | <i>P. stephencairnsi</i> | PAR_C101_BCS    | 5,332,619 | 446,452 | 4,652,535 | 4,030,919 | 30,684 | 4,061,603 | 76.17 |
| <i>P. stephencairnsi</i> | <i>P. stephencairnsi</i> | PAR_C102_BCS    | 4,347,757 | 348,662 | 3,710,381 | 3,221,934 | 26,559 | 3,248,493 | 74.72 |
| <i>P. stephencairnsi</i> | <i>P. stephencairnsi</i> | PAR_C104_BCS    | 2,720,994 | 210,479 | 2,203,568 | 1,893,649 | 19,213 | 1,912,862 | 70.30 |
| <i>P. stephencairnsi</i> | <i>P. stephencairnsi</i> | PAR_FOC25_BCD   | 5,479,109 | 453,625 | 4,693,804 | 4,073,503 | 34,583 | 4,108,086 | 74.98 |
| <i>P. stephencairnsi</i> | <i>P. stephencairnsi</i> | PAR_FOC26_BCD   | 5,242,949 | 477,361 | 4,528,629 | 3,778,655 | 37,137 | 3,815,792 | 72.78 |
| <i>P. stephencairnsi</i> | <i>P. stephencairnsi</i> | PAR_FOC30_BCD   | 4,417,520 | 337,501 | 3,781,973 | 3,312,791 | 32,621 | 3,345,412 | 75.73 |
| <i>P. stephencairnsi</i> | <i>P. stephencairnsi</i> | PAR_FOC5_BCD    | 2,834,377 | 239,051 | 2,455,041 | 2,109,251 | 23,444 | 2,132,695 | 75.24 |
| <i>S. cauliflora</i>     |                          | SIB_1122230_DAV | 1,701,751 | 123,755 | 1,220,077 | 1,016,203 | 26,104 | 1,042,307 | 61.25 |
| <i>S. cauliflora</i>     |                          | SIB_2036_GOM    | 2,638,533 | 191,392 | 2,373,232 | 2,077,092 | 20,727 | 2,097,819 | 79.51 |
| <b>AVERAGE</b>           |                          |                 | 3,944,974 | 292,232 | 3,395,704 | 2,950,279 | 28,840 | 2,979,119 | 74.27 |
| <b>STD DEV.</b>          |                          |                 | 1,392,573 | 105,332 | 1,352,276 | 1,219,146 | 7,968  | 1,222,799 | 8.09  |

**Table S3. RAD-seq backbone clustering and matrix statistics.**

| Matrix    | Min. # of taxa per locus (m) | Cluster threshold (c) | Total # loci in matrix | Number of loci recovered in final data set for each taxon |              |              |             |              |               |               |              |              |              |            |              | Total # of phylogenetically informative sites (pis) | Total # of variable sites (var) | Total # of missing data |      |
|-----------|------------------------------|-----------------------|------------------------|-----------------------------------------------------------|--------------|--------------|-------------|--------------|---------------|---------------|--------------|--------------|--------------|------------|--------------|-----------------------------------------------------|---------------------------------|-------------------------|------|
|           |                              |                       |                        | ANT_85040_NZ                                              | COR_86121_NZ | HEM_82674_NZ | PAR_0672_BC | PAR_11369_NZ | PAR_12016_NES | PAR_20136_GOM | PAR_66097_NZ | PAR_82260_NZ | PAR_PR27_BCD | PoC_p4_ARG | SIB_2036_GOM |                                                     |                                 |                         |      |
| e80d5m4p3 | 4                            | 80                    | 62,726                 | 10,588                                                    | 24,303       | 25,369       | 41,190      | 44,891       | 38,333        | 46,858        | 42,472       | 41,810       | 45,377       | 7,154      | 26,243       | 601,763                                             | 109,290                         | 0.18                    | 49.6 |
| e80d5m6p3 | 6                            | 80                    | 35,340                 | 8,518                                                     | 18,512       | 19,033       | 28,087      | 29,555       | 27,273        | 30,193        | 28,098       | 28,763       | 29,647       | 5,665      | 19,485       | 388,349                                             | 81,574                          | 0.21                    | 38.3 |
| e80d5m9p3 | 9                            | 80                    | 10,333                 | 5,176                                                     | 8,607        | 8,701        | 9,558       | 9,778        | 9,528         | 9,879         | 9,477        | 9,635        | 9,794        | 3,458      | 8,183        | 132,803                                             | 32,017                          | 0.24                    | 20.7 |
| e85d5m4p3 | 4                            | 85                    | 62,318                 | 8,692                                                     | 22,647       | 23,757       | 40,930      | 45,124       | 37,243        | 46,984        | 42,725       | 41,154       | 45,540       | 5,918      | 24,943       | 519,766                                             | 89,806                          | 0.17                    | 50.1 |
| e85d5m6p3 | 6                            | 85                    | 33,785                 | 7,020                                                     | 17,146       | 17,608       | 27,047      | 28,504       | 26,012        | 29,192        | 27,197       | 27,640       | 28,608       | 4,715      | 18,225       | 328,464                                             | 66,419                          | 0.20                    | 38.3 |
| e85d5m9p3 | 9                            | 85                    | 9,411                  | 4,374                                                     | 7,947        | 8,024        | 8,752       | 8,922        | 8,729         | 9,041         | 8,666        | 8,852        | 8,953        | 2,960      | 7,447        | 109,189                                             | 26,048                          | 0.24                    | 20.1 |
| e90d5m4p3 | 4                            | 90                    | 58,765                 | 5,796                                                     | 18,775       | 19,255       | 37,994      | 43,101       | 33,306        | 44,722        | 40,899       | 37,911       | 43,075       | 4,073      | 21,371       | 402,245                                             | 63,938                          | 0.16                    | 51.4 |
| e90d5m6p3 | 6                            | 90                    | 28,923                 | 4,674                                                     | 13,826       | 13,932       | 23,212      | 24,715       | 22,141        | 25,263        | 23,694       | 23,804       | 24,705       | 3,226      | 14,961       | 236,051                                             | 45,285                          | 0.19                    | 38.5 |
| e90d5m9p3 | 9                            | 90                    | 7,312                  | 2,943                                                     | 6,277        | 6,318        | 6,855       | 6,955        | 6,836         | 7,048         | 6,779        | 6,905        | 6,984        | 2,029      | 5,815        | 72,149                                              | 16,695                          | 0.23                    | 19.4 |



**Table S4. RAD-seq PHYLO clustering and matrix statistics.**

| Morphological Species       | Delimitation model PABSTE | RAD-seq data file ID | Total number of clusters | Mean cluster depth | Std. dev. of cluster depth | Number of clusters with depth greater than 5 | Mean depth of clusters with depth greater than 5 | Std. dev. of cluster depth for clusters with depth greater than 5 | Number of loci with >5 depth coverage | Number of loci with >5 depth and passed paralog filter | Number of sites across loci | Number of polymorphic sites | Frequency of polymorphic sites |
|-----------------------------|---------------------------|----------------------|--------------------------|--------------------|----------------------------|----------------------------------------------|--------------------------------------------------|-------------------------------------------------------------------|---------------------------------------|--------------------------------------------------------|-----------------------------|-----------------------------|--------------------------------|
| <i>Anthomastus sp</i>       |                           | PoC_p4_ARG           | 142,551                  | 5.7                | 11.5                       | 54,060                                       | 11.9                                             | 16.9                                                              | 142,551                               | 54,050                                                 | 3,917,645                   | 12,866                      | 0.0032841                      |
| <i>Corallium sp</i>         |                           | COR_86121_NZ         | 176,085                  | 9.6                | 34.3                       | 85,869                                       | 17.8                                             | 47.8                                                              | 176,085                               | 85,816                                                 | 6,332,203                   | 29,627                      | 0.0046788                      |
| <i>H. imperiale-lauense</i> |                           | COR_64642_NZ         | 177,897                  | 4.3                | 26.1                       | 29,162                                       | 16.7                                             | 62.8                                                              | 177,897                               | 29,125                                                 | 1,205,608                   | 6,515                       | 0.0054039                      |
| <i>H. imperiale-lauense</i> |                           | COR_83361_NZ         | 190,447                  | 7.2                | 63.8                       | 74,091                                       | 15.7                                             | 101.7                                                             | 190,447                               | 74,069                                                 | 5,426,154                   | 20,057                      | 0.0036964                      |
| <i>H. imperiale-lauense</i> |                           | HEM_82674_NZ         | 219,724                  | 8.9                | 53.4                       | 92,866                                       | 18.8                                             | 81.1                                                              | 219,724                               | 92,810                                                 | 6,834,388                   | 29,969                      | 0.0043850                      |
| <i>H. imperiale-lauense</i> |                           | HEM_86234_NZ         | 155,795                  | 7.8                | 35.4                       | 70,304                                       | 14.7                                             | 51.8                                                              | 155,795                               | 70,274                                                 | 4,900,969                   | 25,071                      | 0.0051155                      |
| <i>H. imperiale-lauense</i> |                           | HEM_86286_NZ         | 252,395                  | 9.0                | 76.6                       | 96,846                                       | 20.8                                             | 122.8                                                             | 252,395                               | 96,772                                                 | 6,912,750                   | 30,928                      | 0.0044741                      |
| <i>H. imperiale-lauense</i> |                           | PAR_86232_NZ         | 219,190                  | 12.6               | 95.8                       | 106,265                                      | 24.0                                             | 136.7                                                             | 219,190                               | 106,145                                                | 7,282,625                   | 32,347                      | 0.0044417                      |
| <i>Heteropolypus sp</i>     |                           | ANT_69654_NZ         | 151,154                  | 15.1               | 52.2                       | 88,266                                       | 24.7                                             | 66.7                                                              | 151,154                               | 88,178                                                 | 6,864,699                   | 18,791                      | 0.0027373                      |
| <i>Heteropolypus sp</i>     |                           | ANT_85040_NZ         | 159,357                  | 15.1               | 42.4                       | 92,201                                       | 24.8                                             | 53.7                                                              | 159,357                               | 92,099                                                 | 7,115,901                   | 27,473                      | 0.0038608                      |
| <i>Heteropolypus sp</i>     |                           | ANT_85662_NZ         | 165,100                  | 10.5               | 120.2                      | 82,840                                       | 19.2                                             | 169.2                                                             | 165,100                               | 82,793                                                 | 6,309,974                   | 23,863                      | 0.0037818                      |
| <i>P. alisonae</i>          | <i>P. alisonae</i>        | PAR_66097_NZ         | 134,879                  | 11.1               | 54.8                       | 79,570                                       | 17.5                                             | 70.7                                                              | 134,879                               | 79,531                                                 | 5,954,159                   | 23,831                      | 0.0040024                      |
| <i>P. arborea</i>           | <i>P. arborea</i>         | PAR_41780_NZ         | 107,360                  | 17.7               | 78.9                       | 76,515                                       | 24.0                                             | 92.7                                                              | 107,360                               | 76,367                                                 | 68,928                      | 20,899                      | 0.0035690                      |
| <i>P. arborea</i>           | <i>P. arborea</i>         | PAR_TC16_03_CAN      | 138,933                  | 7.7                | 46.4                       | 62,427                                       | 14.9                                             | 68.6                                                              | 138,933                               | 62,399                                                 | 54,495                      | 13,801                      | 0.0029837                      |
| <i>P. arborea</i>           | <i>P. pacifica</i>        | PAR_0672_BC          | 116,545                  | 21.4               | 71.8                       | 85,334                                       | 28.5                                             | 82.8                                                              | 116,545                               | 85,165                                                 | 77,189                      | 25,068                      | 0.0038214                      |
| <i>P. arborea</i>           | <i>P. pacifica</i>        | PAR_1007340_BCD      | 149,606                  | 9.9                | 30.4                       | 76,311                                       | 17.6                                             | 41.0                                                              | 149,606                               | 76,259                                                 | 5,736,203                   | 22,134                      | 0.0038587                      |
| <i>P. arborea</i>           | <i>P. pacifica</i>        | PAR_1601_BC          | 118,243                  | 21.7               | 65.9                       | 85,263                                       | 29.3                                             | 76.2                                                              | 118,243                               | 85,074                                                 | 77,035                      | 24,879                      | 0.0037997                      |
| <i>P. coralloides</i>       | <i>P. coralloides</i>     | PAR_063902_NES       | 132,778                  | 20.1               | 61.7                       | 87,919                                       | 29.4                                             | 74.1                                                              | 132,778                               | 87,756                                                 | 79,692                      | 26,579                      | 0.0039236                      |
| <i>P. coralloides</i>       | <i>P. coralloides</i>     | PAR_12016_NES        | 129,675                  | 36.8               | 207.3                      | 90,736                                       | 51.8                                             | 246.3                                                             | 129,675                               | 90,474                                                 | 82,903                      | 21,990                      | 0.0031193                      |
| <i>P. johnsoni</i>          | <i>P. johnsoni</i>        | PAR_20136_GOM        | 122,432                  | 29.8               | 487.2                      | 89,665                                       | 40.0                                             | 568.9                                                             | 122,432                               | 89,630                                                 | 81,301                      | 23,857                      | 0.0034518                      |
| <i>P. kaupeka</i>           | <i>P. kaupeka</i>         | PAR_72152_NZ         | 132,520                  | 12.7               | 197.2                      | 77,976                                       | 20.2                                             | 256.8                                                             | 132,520                               | 77,929                                                 | 69,780                      | 16,005                      | 0.0027004                      |
| <i>P. kaupeka</i>           | <i>P. kaupeka</i>         | PAR_82260_NZ         | 186,768                  | 13.1               | 77.9                       | 89,892                                       | 25.4                                             | 110.9                                                             | 186,768                               | 89,766                                                 | 80,556                      | 17,710                      | 0.0025870                      |
| <i>P. kaupeka</i>           | <i>P. kaupeka</i>         | PAR_82342_NZ         | 148,202                  | 12.6               | 43.0                       | 83,517                                       | 21.0                                             | 55.8                                                              | 148,202                               | 83,429                                                 | 74,747                      | 16,935                      | 0.0026670                      |
| <i>P. kaupeka</i>           | <i>P. kaupeka</i>         | PAR_84804_NZ         | 124,756                  | 10.5               | 119.9                      | 69,174                                       | 17.3                                             | 160.6                                                             | 124,756                               | 69,119                                                 | 61,022                      | 15,300                      | 0.0029525                      |
| <i>P. maunga</i>            | <i>P. maunga</i>          | PAR_11369_NZ         | 113,838                  | 19.3               | 161.8                      | 84,649                                       | 25.2                                             | 187.3                                                             | 113,838                               | 84,510                                                 | 76,038                      | 26,079                      | 0.0040358                      |
| <i>P. stephencairnsi</i>    | <i>P. sp nov</i>          | PAR_1007316_BCD      | 166,722                  | 5.9                | 17.7                       | 60,649                                       | 12.9                                             | 27.9                                                              | 166,722                               | 60,636                                                 | 4,357,427                   | 19,584                      | 0.0044944                      |

|                           |                          |                 |         |      |       |         |      |       |         |         |        |           |        |           |
|---------------------------|--------------------------|-----------------|---------|------|-------|---------|------|-------|---------|---------|--------|-----------|--------|-----------|
| <i>P. stephencairnsi</i>  | <i>P. sp nov</i>         | PAR_2344_BC     | 125,366 | 13.4 | 51.7  | 80,271  | 19.9 | 63.7  | 125,366 | 80,218  | 72,194 | 6,132,435 | 25,912 | 0.0042254 |
| <i>P. stephencairnsi</i>  | <i>P. stephencairnsi</i> | PAR_101010_CA   | 115,888 | 33.2 | 134.3 | 92,526  | 41.1 | 149.3 | 115,888 | 92,225  | 84,367 | 7,173,308 | 24,279 | 0.0033846 |
| <i>P. stephencairnsi</i>  | <i>P. stephencairnsi</i> | PAR_1124300_WA  | 109,466 | 20.9 | 103.4 | 83,749  | 26.8 | 117.6 | 109,466 | 83,645  | 76,157 | 6,471,962 | 21,532 | 0.0033270 |
| <i>P. stephencairnsi</i>  | <i>P. stephencairnsi</i> | PAR_Agam_BC     | 131,554 | 19.3 | 95.4  | 87,778  | 28.1 | 115.8 | 131,554 | 87,648  | 79,612 | 6,766,163 | 23,143 | 0.0034204 |
| <i>P. stephencairnsi</i>  | <i>P. stephencairnsi</i> | PAR_C02_BCS     | 111,985 | 9.0  | 22.7  | 63,618  | 14.2 | 29.0  | 111,985 | 63,597  | 56,380 | 4,786,614 | 16,361 | 0.0034181 |
| <i>P. stephencairnsi</i>  | <i>P. stephencairnsi</i> | PAR_C03_BCS     | 116,493 | 11.7 | 41.1  | 75,396  | 17.0 | 50.3  | 116,493 | 75,356  | 67,485 | 5,732,283 | 20,104 | 0.0035072 |
| <i>P. stephencairnsi</i>  | <i>P. stephencairnsi</i> | PAR_C04_BCS     | 128,452 | 13.0 | 47.9  | 81,845  | 19.4 | 59.1  | 128,452 | 81,792  | 73,789 | 6,269,830 | 21,010 | 0.0033510 |
| <i>P. stephencairnsi</i>  | <i>P. stephencairnsi</i> | PAR_C05_BCS     | 128,134 | 13.9 | 64.4  | 83,590  | 20.3 | 79.0  | 128,134 | 83,533  | 75,306 | 6,399,562 | 21,288 | 0.0033265 |
| <i>P. stephencairnsi</i>  | <i>P. stephencairnsi</i> | PAR_C100_BCS    | 152,749 | 19.9 | 55.9  | 92,858  | 31.6 | 69.2  | 152,749 | 92,693  | 84,309 | 7,168,326 | 22,907 | 0.0031956 |
| <i>P. stephencairnsi</i>  | <i>P. stephencairnsi</i> | PAR_C101_BCS    | 152,447 | 18.4 | 82.8  | 92,630  | 29.2 | 104.8 | 152,447 | 92,487  | 83,853 | 7,129,265 | 23,371 | 0.0032782 |
| <i>P. stephencairnsi</i>  | <i>P. stephencairnsi</i> | PAR_C102_BCS    | 131,680 | 17.3 | 46.6  | 88,133  | 24.9 | 55.3  | 131,680 | 88,038  | 79,983 | 6,798,340 | 21,816 | 0.0032090 |
| <i>P. stephencairnsi</i>  | <i>P. stephencairnsi</i> | PAR_C104_BCS    | 119,764 | 11.4 | 29.6  | 74,773  | 17.0 | 36.3  | 119,764 | 74,738  | 67,146 | 5,703,606 | 18,976 | 0.0033270 |
| <i>P. stephencairnsi</i>  | <i>P. stephencairnsi</i> | PAR_FOC25_BCD   | 154,768 | 18.3 | 56.3  | 93,419  | 29.2 | 70.4  | 154,768 | 93,284  | 84,570 | 7,190,050 | 24,801 | 0.0034494 |
| <i>P. stephencairnsi</i>  | <i>P. stephencairnsi</i> | PAR_FOC26_BCD   | 440,488 | 6.3  | 26.0  | 107,701 | 20.5 | 49.9  | 440,488 | 107,621 | 94,298 | 8,008,313 | 28,868 | 0.0036048 |
| <i>P. stephencairnsi</i>  | <i>P. stephencairnsi</i> | PAR_FOC30_BCD   | 314,181 | 7.6  | 44.3  | 95,360  | 21.1 | 78.8  | 314,181 | 95,276  | 84,774 | 7,202,768 | 24,900 | 0.0034570 |
| <i>P. stephencairnsi</i>  | <i>P. stephencairnsi</i> | PAR_FOC5_BCD    | 197,822 | 7.5  | 60.1  | 75,192  | 16.9 | 96.8  | 197,822 | 75,145  | 66,755 | 5,669,791 | 19,056 | 0.0033610 |
| <i>S. cauliflora</i>      |                          | SIB_1122230_DAV | 123,947 | 5.5  | 29.3  | 40,167  | 12.8 | 50.7  | 123,947 | 40,157  | 33,058 | 2,804,036 | 11,864 | 0.0042310 |
| <i>S. cauliflora</i>      |                          | SIB_2036_GOM    | 127,391 | 11.3 | 36.4  | 71,374  | 18.6 | 47.3  | 127,391 | 71,315  | 63,094 | 5,358,510 | 17,312 | 0.0032307 |
| <b>AVERAGE</b>            |                          |                 | 157,171 | 13.9 | 76.4  | 80,744  | 22.6 | 99.0  | 157,171 | 80,658  | 71,425 | 6,068,313 | 21,810 | 0.0036393 |
| <b>STANDARD DEVIATION</b> |                          |                 | 59,920  | 7.2  | 77.0  | 15,153  | 8.0  | 89.6  | 59,920  | 15,119  | 14,833 | 1,262,657 | 5,318  | 0.0006234 |

**Table S5.** Nucleotide diversity and error rate estimates per specimen based on the **PHYLO** matrix

| <b>Morphological Species</b>   | <b>PABSTE</b>            | <b>RAD-seq data file ID</b> | <b>Nucleotide diversity (Pi)</b> | <b>Error Rate</b> |
|--------------------------------|--------------------------|-----------------------------|----------------------------------|-------------------|
| <i>Anthomastus sp</i>          |                          | PoC_p4_ARG                  | 0.01295412                       | 0.0029032         |
| <i>Corallium sp</i>            |                          | COR_86121_NZ                | 0.01467291                       | 0.00258843        |
| <i>H. imperiale-laauiense*</i> |                          | COR_64642_NZ                | 0.04406216                       | 0.01630744        |
| <i>H. imperiale-laauiense</i>  |                          | COR_83361_NZ                | 0.01399387                       | 0.00269528        |
| <i>H. imperiale-laauiense</i>  |                          | HEM_82674_NZ                | 0.01440962                       | 0.00268885        |
| <i>H. imperiale-laauiense</i>  |                          | HEM_86234_NZ                | 0.01676557                       | 0.00254558        |
| <i>H. imperiale-laauiense</i>  |                          | HEM_86286_NZ                | 0.01526906                       | 0.00234296        |
| <i>H. imperiale-laauiense</i>  |                          | PAR_86232_NZ                | 0.01633107                       | 0.00217237        |
| <i>Heteropolypus sp</i>        |                          | ANT_69654_NZ                | 0.00936378                       | 0.00151989        |
| <i>Heteropolypus sp</i>        |                          | ANT_85040_NZ                | 0.01122064                       | 0.00146665        |
| <i>Heteropolypus sp</i>        |                          | ANT_85662_NZ                | 0.01161827                       | 0.00189506        |
| <i>P. alisonae</i>             | <i>P. alisonae</i>       | PAR_66097_NZ                | 0.0127996                        | 0.00205016        |
| <i>P. arborea</i>              | <i>P. arborea</i>        | PAR_41780_NZ                | 0.01209999                       | 0.00186767        |
| <i>P. arborea</i>              | <i>P. arborea</i>        | PAR_TC16_03_CAN             | 0.01293451                       | 0.00241858        |
| <i>P. arborea</i>              | <i>P. pacifica</i>       | PAR_0672_BC                 | 0.01189447                       | 0.00170062        |
| <i>P. arborea</i>              | <i>P. pacifica</i>       | PAR_1007340_BCD             | 0.01285038                       | 0.00223148        |
| <i>P. arborea</i>              | <i>P. pacifica</i>       | PAR_1601_BC                 | 0.01205019                       | 0.00164477        |
| <i>P. coralloides</i>          | <i>P. coralloides</i>    | PAR_063902_NES              | 0.01182997                       | 0.00146894        |
| <i>P. coralloides</i>          | <i>P. coralloides</i>    | PAR_12016_NES               | 0.01035726                       | 0.00116583        |
| <i>P. johnsoni</i>             | <i>P. johnsoni</i>       | PAR_20136_GOM               | 0.01159218                       | 0.00137491        |
| <i>P. kaupeka</i>              | <i>P. kaupeka</i>        | PAR_72152_NZ                | 0.01085919                       | 0.00209157        |
| <i>P. kaupeka</i>              | <i>P. kaupeka</i>        | PAR_82260_NZ                | 0.01077562                       | 0.00211998        |
| <i>P. kaupeka</i>              | <i>P. kaupeka</i>        | PAR_82342_NZ                | 0.01082052                       | 0.00225821        |
| <i>P. kaupeka</i>              | <i>P. kaupeka</i>        | PAR_84804_NZ                | 0.01169178                       | 0.00221668        |
| <i>P. maunga</i>               | <i>P. maunga</i>         | PAR_11369_NZ                | 0.01225252                       | 0.00176518        |
| <i>P. stephencairnsi</i>       | <i>P. sp. nov</i>        | PAR_1007316_BCD             | 0.01488811                       | 0.00295065        |
| <i>P. stephencairnsi</i>       | <i>P. sp. nov</i>        | PAR_2344_BC                 | 0.01260347                       | 0.00188425        |
| <i>P. stephencairnsi</i>       | <i>P. stephencairnsi</i> | PAR_101010_CA               | 0.01063818                       | 0.00134692        |
| <i>P. stephencairnsi</i>       | <i>P. stephencairnsi</i> | PAR_1124300_WA              | 0.01092481                       | 0.00163497        |
| <i>P. stephencairnsi</i>       | <i>P. stephencairnsi</i> | PAR_Agam_BC                 | 0.01117934                       | 0.00151902        |
| <i>P. stephencairnsi</i>       | <i>P. stephencairnsi</i> | PAR_C02_BCS                 | 0.01180863                       | 0.00194975        |
| <i>P. stephencairnsi</i>       | <i>P. stephencairnsi</i> | PAR_C03_BCS                 | 0.01129071                       | 0.00175198        |
| <i>P. stephencairnsi</i>       | <i>P. stephencairnsi</i> | PAR_C04_BCS                 | 0.01098867                       | 0.00171446        |
| <i>P. stephencairnsi</i>       | <i>P. stephencairnsi</i> | PAR_C05_BCS                 | 0.01117442                       | 0.00167389        |
| <i>P. stephencairnsi</i>       | <i>P. stephencairnsi</i> | PAR_C100_BCS                | 0.01063313                       | 0.00155401        |
| <i>P. stephencairnsi</i>       | <i>P. stephencairnsi</i> | PAR_C101_BCS                | 0.0109634                        | 0.00160305        |
| <i>P. stephencairnsi</i>       | <i>P. stephencairnsi</i> | PAR_C102_BCS                | 0.01060609                       | 0.00159815        |
| <i>P. stephencairnsi</i>       | <i>P. stephencairnsi</i> | PAR_C104_BCS                | 0.01124495                       | 0.00175065        |
| <i>P. stephencairnsi</i>       | <i>P. stephencairnsi</i> | PAR_FOC25_BCD               | 0.01104859                       | 0.00154584        |
| <i>P. stephencairnsi</i>       | <i>P. stephencairnsi</i> | PAR_FOC26_BCD               | 0.01263196                       | 0.00180015        |
| <i>P. stephencairnsi</i>       | <i>P. stephencairnsi</i> | PAR_FOC30_BCD               | 0.01196811                       | 0.00182162        |
| <i>P. stephencairnsi</i>       | <i>P. stephencairnsi</i> | PAR_FOC5_BCD                | 0.0119129                        | 0.00186229        |
| <i>S. cauliflora</i>           |                          | SIB_1122230_DAV             | 0.01525699                       | 0.00328691        |
| <i>S. cauliflora</i>           |                          | SIB_2036_GOM                | 0.01214983                       | 0.00221517        |
|                                |                          | <b>AVERAGE</b>              | 0.01291599                       | 0.00228532        |
|                                |                          | <b>SD</b>                   | 0.00513429                       | 0.00223806        |

\*Excluded from calculations due to low number of loci

**Table S6.** Nucleotide diversity and error rate estimates per species based on the **PHYLO** matrix

| Morphological Species        | Delimitation model PABSTE | Nucleotide diversity (Pi) |            |            | Per-site sequence error rate (Epsilon) |            |            |
|------------------------------|---------------------------|---------------------------|------------|------------|----------------------------------------|------------|------------|
|                              |                           | mean                      | SD         | SE         | mean                                   | SD         | SE         |
| <i>Anthomastus sp</i>        |                           | 0.01295412                |            |            | 0.00290320                             |            |            |
| <i>Corallium sp</i>          |                           | 0.01467291                |            |            | 0.00258843                             |            |            |
| <i>H. imperiale-laauense</i> |                           | 0.01935775                | 0.01094005 | 0.00489254 | 0.00447727                             | 0.00522005 | 0.00233448 |
| <i>Heteropolypus sp</i>      |                           | 0.01073423                | 0.00120338 | 0.00069477 | 0.00162720                             | 0.00023350 | 0.00013481 |
| <i>P. alisonae</i>           | <i>P. alisonae</i>        | 0.01279960                |            |            | 0.00205016                             |            |            |
| <i>P. arborea</i>            | <i>P. arborea</i>         | 0.01245029                | 0.00056582 | 0.00040010 | 0.00193813                             | 0.00041487 | 0.00029336 |
| <i>P. arborea</i>            | <i>P. pacifica</i>        | 0.01073423                | 0.00120338 | 0.00069477 | 0.00162720                             | 0.00023350 | 0.00013481 |
| <i>P. coralloides</i>        | <i>P. coralloides</i>     | 0.01245029                | 0.00056582 | 0.00040010 | 0.00193813                             | 0.00041487 | 0.00029336 |
| <i>P. johnsoni</i>           | <i>P. johnsoni</i>        | 0.01159218                |            |            | 0.00137491                             |            |            |
| <i>P. kaupeka</i>            | <i>P. kaupeka</i>         | 0.01241323                | 0.00175196 | 0.00087598 | 0.00229768                             | 0.00048923 | 0.00024462 |
| <i>P. maunga</i>             | <i>P. maunga</i>          | 0.01225252                |            |            | 0.00176518                             |            |            |
| <i>P. stephencairnsi</i>     | <i>P. sp. nov</i>         | 0.01290646                | 0.00280248 | 0.00198165 | 0.00229281                             | 0.00093033 | 0.00065784 |
| <i>P. stephencairnsi</i>     | <i>P. stephencairnsi</i>  | 0.01137950                | 0.00066172 | 0.00016543 | 0.00169174                             | 0.00016364 | 0.00004091 |
| <i>S. cauliflora</i>         |                           | 0.01370341                | 0.00219709 | 0.00155358 | 0.00275104                             | 0.00075783 | 0.00053587 |

**Table S7.** Predictions of # of RAD-tags in octocorals using PstI. Data for *Nematostella vectensis* obtained from the U.S. Joint Genome Institute (JGI-DOE) database. Data for *Acropora digitifera*, *Hydra vulgaris*, and *Alatina moseri* obtained from the U.S. National Center for Biotechnology Information (NCBI) WGS database. Observed frequency of recognition sequences and calculated probability based on a trinucleotide genome composition model were generated following the methodology described by Herrera et al. (2014). Octocoral genome size ranges were obtained by Luisa Dueñas from gorgoniid octocorals through flow cytometry at the Universidad de los Andes, Bogota, Colombia. Abbreviation: restriction sites (RS).

Cnidarians with sequenced genomes

| Species                                | Common name     | C-value | Genome size (Mbp) | Unambiguous | Observed frequency of PstI RS per bp |                    | Prob. of PstI recognition site per bp based on trinucleotide model |                                                                    |
|----------------------------------------|-----------------|---------|-------------------|-------------|--------------------------------------|--------------------|--------------------------------------------------------------------|--------------------------------------------------------------------|
|                                        |                 |         |                   |             | PstI RS per bp                       | Observed frequency | PstI RS based on trinucleotide model                               | Prob. of PstI recognition site per bp based on trinucleotide model |
| <a href="#">Nematostella vectensis</a> | Starlet Anemone |         | 297.39            |             | 0.00016661                           | 0.00019608         |                                                                    |                                                                    |
| <a href="#">Acropora digitifera</a>    | Staghorn Coral  |         | 364.97            |             | 0.00021313                           | 0.00022777         |                                                                    |                                                                    |
| <a href="#">Hydra vulgaris</a>         | Hydra           |         | 1189.96           |             | 0.00010830                           | 0.00010871         |                                                                    |                                                                    |
| <a href="#">Alatina moseri</a>         | Sea Wasp        |         | 1544.15           |             | 0.00020617                           | 0.00021637         |                                                                    |                                                                    |

Predictions of # of PstI RS in known octocoral genome size range

| Octocoral C-value | Genome size (Mbp) | Predicted # of PstI RS based on <i>N. vectensis</i> |                         | Predicted # of PstI RS based on <i>A. digitifera</i> |                         | Predicted # of PstI RS based on <i>H. vulgaris</i> |                         | Predicted # of PstI RS based on <i>A. moseri</i> |                         |
|-------------------|-------------------|-----------------------------------------------------|-------------------------|------------------------------------------------------|-------------------------|----------------------------------------------------|-------------------------|--------------------------------------------------|-------------------------|
|                   |                   | observed frequency                                  | composition probability | observed frequency                                   | composition probability | observed frequency                                 | composition probability | observed frequency                               | composition probability |
| 0.3               | 293.40            | 48,882.95                                           | 66,828.40               | 62,533.09                                            | 66,828.40               | 31,774.37                                          | 31,895.01               | 60,489.13                                        | 63,482.46               |
| 0.5               | 489.00            | 81,471.59                                           | 95,883.23               | 104,221.81                                           | 111,380.67              | 52,957.29                                          | 53,158.36               | 100,815.22                                       | 105,804.09              |

Predictions of # of PstI RAD-tags in known octocoral genome size range

| Octocoral C-value | Genome size (Mbp) | Predicted # of PstI RS based on <i>N. vectensis</i> |                         | Predicted # of PstI RS based on <i>A. digitifera</i> |                         | Predicted # of PstI RS based on <i>H. vulgaris</i> |                         | Predicted # of PstI RS based on <i>A. moseri</i> |                         |
|-------------------|-------------------|-----------------------------------------------------|-------------------------|------------------------------------------------------|-------------------------|----------------------------------------------------|-------------------------|--------------------------------------------------|-------------------------|
|                   |                   | observed frequency                                  | composition probability | observed frequency                                   | composition probability | observed frequency                                 | composition probability | observed frequency                               | composition probability |
| 0.3               | 293.40            | 97,765.91                                           | 125,066.17              | 125,066.17                                           | 125,066.17              | 63,548.75                                          | 63,548.75               | 120,978.26                                       | 120,978.26              |
| 0.5               | 489.00            | 162,943.18                                          | 208,443.62              | 208,443.62                                           | 208,443.62              | 105,914.58                                         | 105,914.58              | 201,630.43                                       | 201,630.43              |

**Table S8.** Collection information for all specimens in the clade AC with available mtMutS sequences

| Species                                | ID               | Genbank on Collecti Catalog Number | Date | Locality                                                       | Depth (m) | Lat.   | Lon.    | Taxonomic remarks |
|----------------------------------------|------------------|------------------------------------|------|----------------------------------------------------------------|-----------|--------|---------|-------------------|
| <i>Anthomastus ritteri</i>             |                  | DQ302816 K. McFadden               | 1998 | Off Pebble Beach: California: USA                              | 300       | 36.58  | -122.10 |                   |
| <i>Anthomastus cf grandiflorus</i>     |                  | KC984603                           |      |                                                                |           |        |         |                   |
| <i>Anthomastus robustus delta</i>      |                  | KC984604                           |      |                                                                |           |        |         |                   |
| <i>Anthomastus sp</i>                  | p4               | WHOI p4                            | 2011 | Patagonian shelf                                               |           |        |         |                   |
| <i>Chelidonis aurantiaca mexicana</i>  |                  | KC788274                           |      |                                                                |           |        |         |                   |
| <i>Corallium elatius</i>               |                  | AB700134                           |      |                                                                |           |        |         |                   |
| <i>Corallium elatius</i>               |                  | AB700135                           |      |                                                                |           |        |         |                   |
| <i>Corallium japonicum</i>             |                  | AB595189                           |      |                                                                |           |        |         |                   |
| <i>Corallium kishinouyei</i>           |                  | GQ293300 USNM                      | 2003 | Off Laysan Island: Hawaii: USA                                 | 1490      | 25.70  | -171.45 |                   |
| <i>Corallium kishinouyei</i>           |                  | KC782353                           |      |                                                                |           |        |         |                   |
| <i>Corallium konojoi</i>               |                  | AB595190                           |      |                                                                |           |        |         |                   |
| <i>Corallium regale</i>                |                  | AF385321                           |      |                                                                |           |        |         |                   |
| <i>Corallium rubrum</i>                |                  | AB700136                           |      |                                                                |           |        |         |                   |
| <i>Corallium secundum</i>              |                  | GQ293303 USNM                      | 2001 | Off Maui: Hawaii: USA                                          | 240       | 20.88  | -156.73 |                   |
| <i>Corallium secundum</i>              |                  | KC782347                           |      |                                                                |           |        |         |                   |
| <i>Corallium sp</i>                    | 86121            | NIWA                               | 2012 | Kermadec Ridge; Colville ridge volcano; TANI213/18             | 380       | -30.19 | 179.72  |                   |
| <i>Corallium sp</i>                    | Coralliumsp56807 | USNM                               | 1978 | USA, Hawaii, Oahu Island, Makapuu Point                        | 366       | 21.30  | -157.53 |                   |
| <i>Corallium sp</i>                    |                  | KC788270                           | 2003 | New Caledonia                                                  | 470-621   | -23.71 | 168.26  |                   |
| <i>Corallium tortuosum</i>             |                  | GQ293306 USNM                      | 2003 | New Caledonia                                                  |           |        |         |                   |
| <i>Hemicorallium ducale</i>            |                  | DQ297416                           |      |                                                                |           |        |         |                   |
| <i>Hemicorallium ducale</i>            |                  | EF060050                           |      |                                                                |           |        |         |                   |
| <i>Hemicorallium ducale</i>            |                  | EU293805                           |      |                                                                |           |        |         |                   |
| <i>Hemicorallium ducale</i>            |                  | KC782352                           |      |                                                                |           |        |         |                   |
| <i>Hemicorallium imperiale</i>         |                  | KC782355                           |      |                                                                |           |        |         |                   |
| <i>Hemicorallium imperiale</i>         |                  |                                    |      |                                                                |           |        |         |                   |
| <i>Hemicorallium imperiale-lauense</i> | 64642            | NIWA                               | 2010 | Kermadec Ridge; Rumble II East seamount cone; TAN1007/97; 1050 |           | -35.42 | 178.65  |                   |
| <i>Hemicorallium imperiale-lauense</i> | 82674            | NIWA                               | 2012 | Kermadec Ridge; Site SM2aa, summit of Whakatane Seamount 878   |           | -36.81 | 177.47  |                   |
| <i>Hemicorallium imperiale-lauense</i> | 83361            | NIWA                               | 2012 | Bay of Plenty; Site SM1b, Matatara Knoll; TANI206/168          | 948       | -37.19 | 176.98  |                   |
| <i>Hemicorallium imperiale-lauense</i> | 86232            | NIWA                               | 2012 | Kermadec Ridge; Northeast pimple volcano; TANI213/22           | 483       | -30.08 | 179.82  |                   |
| <i>Hemicorallium imperiale-lauense</i> | 86234            | NIWA                               | 2012 | Kermadec Ridge; Northeast pimple volcano; TANI213/22           | 483       | -30.08 | 179.82  |                   |
| <i>Hemicorallium imperiale-lauense</i> | 86286            | NIWA                               | 2012 | Kermadec Ridge; Havre volcano; TANI213/30                      | 860       | -31.13 | -179.05 |                   |
| <i>Hemicorallium imperiale-lauense</i> | Clauense1072452  | USNM                               | 2003 | USA, Hawaii, Laysan Island                                     | 1509      | 25.70  | -171.44 |                   |
| <i>Hemicorallium imperiale-lauense</i> |                  | GQ293301 USNM                      | 2004 | Off Keahole Point: Hawaii Island: Hawaii: USA                  | 867       | 19.80  | -156.13 |                   |
| <i>Hemicorallium imperiale-lauense</i> |                  | GQ293302 USNM                      | 2004 | Pratt Seamount: Alaska: USA                                    | 1627      | 56.32  | -142.44 |                   |
| <i>Hemicorallium laauense</i>          |                  | KC782348                           |      |                                                                |           |        |         |                   |
| <i>Hemicorallium niobe</i>             |                  | EF060051                           |      |                                                                |           |        |         |                   |
| <i>Hemicorallium niobe</i>             |                  | KC788267                           |      |                                                                |           |        |         |                   |
| <i>Heteropolypus sp</i>                | 69654            | NIWA                               | 2011 | Chatam Rise; TRIP3306/78                                       | 495       | -44.33 | -177.22 |                   |
| <i>Heteropolypus sp</i>                | 85040            | NIWA                               | 2012 | Chatam Rise; TANI208/22                                        | 2098      | -42.59 | 179.42  |                   |
| <i>Heteropolypus sp</i>                | 85662            | NIWA                               | 2012 | Chatam Rise; TANI208/61                                        | 1931      | -42.59 | 179.59  |                   |
| <i>Ideogorgia capensis</i>             |                  | GQ342502                           |      |                                                                |           |        |         |                   |
| <i>Paragorgia allisonae</i>            | 66097            | NIWA                               | 2008 | Cambell Plateau; TRIP2718/50                                   | 875       | -50.02 | 175.00  |                   |
| <i>Paragorgia allisonae</i>            | Palisomae3312    | NIWA                               | 1998 | New Zealand, Otago Hill, 1171/25, Z9596                        | 980       | -48.02 | 166.08  | type              |

|                            |                  |          |               |             |                                                              |          |          |                   |              |
|----------------------------|------------------|----------|---------------|-------------|--------------------------------------------------------------|----------|----------|-------------------|--------------|
| Paragorgia alisonae        | Palisonae3313    | NIWA     | 3313          | 1998        | New Zealand, Otara Hill, 1171/25, Z9596                      | 980      | -48.02   | 166.08            | type         |
| Paragorgia alisonae        | Palisonae3315    | NIWA     | 3315          | 1998        | New Zealand, Otara Hill, 1171/24, Z9595                      | 940      | -48.02   | 166.10            | type         |
| Paragorgia alisonae        | Palisonae3316    | NIWA     | 3316          | 1997        | New Zealand, TAN9713/037, Z8981                              | 1041     | -44.96   | 174.19            | type         |
| Paragorgia alisonae        | Palisonae3317    | NIWA     | 3317          | 1998        | New Zealand, TRIP1171/12, Z9583                              | 935      | -48.03   | 166.10            | type         |
| Paragorgia alisonae        | Palisonae42002   | NIWA     | 42002         | 2008        | New Zealand, TRIP2551/258                                    | 930.0    | -44.7850 | -176.583333333333 |              |
| Paragorgia alisonae        | Palisonae44606   | NIWA     | 44606         | 2007        | New Zealand, TRIP2521/9                                      | 1068     | -44.7433 | -177.05333333     |              |
| Paragorgia alisonae        | ParagospValpo046 | Valpo046 |               |             | Chile, Valparaiso, deep seamount                             |          |          |                   |              |
| <i>Paragorgia aotearoa</i> |                  | GQ293305 | NIWA          | 3325        | New Zealand, Mt. Muck (Box Hill Complex), TAN9609/40         | 700      | -42.83   | 176.92            | type         |
| Paragorgia arborea         | 0672             | RBCM     | 011-00067-002 | 2004        | British Columbia, VE14280                                    |          | 53.33    | -135.66           |              |
| Paragorgia arborea         | 1601             | RBCM     | 011-00160-001 | 2009        | British Columbia, VE14444                                    | 695      | 53.31    | -135.58           |              |
| Paragorgia arborea         | 41780            | JX124558 | NIWA          | 41870       | New Zealand, TRIP2617/120                                    | 600      | -44.52   | 175.78            |              |
| Paragorgia arborea         | 1007340          | JX124556 | USNM          | 1007340     | British Columbia, Vancouver Island                           | 1168     | 48.44    | -126.38           |              |
| Paragorgia arborea         | Paragosp1014919  | JX124578 | USNM          | 1014919     | Davidson Seamount, California, USA                           | 1313     | 35.70    | -122.70           | Sanchez 2005 |
| Paragorgia arborea         | Paragosp1027060  | JX124560 | USNM          | 1027060     | Pioneer Seamount, South of farallon Islands, California, USA | 1712     | 37.40    | -123.44           |              |
| Paragorgia arborea         | Paragosp1075738  | JX124526 | USNM          | 1075738     | Dickins Seamount, Gulf of Alaska, USA                        | 760      | 54.55    | -136.84           |              |
| Paragorgia arborea         | Paragosp1075744  | JX124565 | USNM          | 1075744     | Dickins Seamount, Gulf of Alaska, USA                        | 851      | 54.51    | -136.91           |              |
| Paragorgia arborea         | Paragosp1075745  | JX124602 | USNM          | 1075745     | Dickins Seamount, Gulf of Alaska, USA                        | 849      | 54.51    | -136.91           |              |
| Paragorgia arborea         | Paragosp1075746  | JX124540 | USNM          | 1075746     | Welker Seamount, Gulf of Alaska, USA                         | 780      | 55.05    | -140.31           |              |
| Paragorgia arborea         | Paragosp1075753  | JX124527 | USNM          | 1075753     | Welker Seamount, Gulf of Alaska, USA                         | 1112     | 55.07    | -140.41           |              |
| Paragorgia arborea         | Paragosp1075754  | JX124593 | USNM          | 1075754     | Welker Seamount, Gulf of Alaska, USA                         | 1084     | 55.07    | -140.41           |              |
| Paragorgia arborea         | Paragosp1075760  | JX124530 | USNM          | 1075760     | Pratt Seamount, Gulf of Alaska, USA                          | 959      | 56.17    | -142.70           |              |
| Paragorgia arborea         | Paragosp1075761  | JX124576 | USNM          | 1075761     | Pratt Seamount, Gulf of Alaska, USA                          | 941      | 56.17    | -142.70           |              |
| Paragorgia arborea         | Paragosp1075766  | JX124541 | USNM          | 1075766     | Welker Seamount, Gulf of Alaska, USA                         | 1114     | 55.07    | -140.41           |              |
| Paragorgia arborea         | Paragosp17971    | JX124592 | NIWA          | 17971       | New Zealand, 1172/06, Z9566                                  | 1235     | -44.80   | -177.12           |              |
| Paragorgia arborea         | Paragosp200701   | JX124587 | B. Stone      | 20070178B01 | Gulf of Alaska, USA                                          | 867      | 55.91    | -154.02           |              |
| Paragorgia arborea         | Paragosp44156    | JX124563 | NIWA          | 44156       | New Zealand, TRIP2416/54                                     | 720-741  | -47.47   | 177.02            |              |
| Paragorgia arborea         | Paragosp46314    | JX124594 | NIWA          | 46314       | New Zealand, TRIP2324/48                                     | 843-998  | -50.05   | 174.73            |              |
| Paragorgia arborea         | Paragosp46315    | JX124569 | NIWA          | 46315       | New Zealand, TRIP2571/65                                     | 888-1011 | -47.55   | 177.86            |              |
| Paragorgia arborea         | Paragosp46316    | JX124573 | NIWA          | 46316       | New Zealand, TRIP2617/120                                    | 600      | -44.52   | 175.77            |              |
| Paragorgia arborea         | Paragosp46317    | JX124603 | NIWA          | 46317       | New Zealand, TRIP2494/13                                     | 931-1021 | -47.58   | 177.78            |              |
| Paragorgia arborea         | Paragosp46318    | JX124583 | NIWA          | 46318       | New Zealand, TRIP2551/254                                    | 794-987  | -44.73   | -177.04           |              |
| Paragorgia arborea         | Paragosp46319    | JX124595 | NIWA          | 46319       | New Zealand, TRIP2614                                        |          | -49.50   | 176.00            |              |
| Paragorgia arborea         | Paragosp46377    | JX124549 | NIWA          | 46377       | New Zealand, TRIP2571/53                                     | 952-1111 | -50.00   | 176.06            |              |
| Paragorgia arborea         | Paragosp56389    |          | USNM          | 56389       | USA, Hawaii, Bushnell Seamount                               | 1920     | 18.55    | -155.44           |              |
| Paragorgia arborea         | ParagospDAV11    | JX124577 | A. Andre      | DAV11       | Davidson Seamount, California, USA                           | 1313     | 35.75    | -122.70           |              |
| Paragorgia arborea         | ParagospDAV13    | JX124542 | A. Andre      | DAV13       | Davidson Seamount, California, USA                           | 1313     | 35.75    | -122.70           |              |
| Paragorgia arborea         | Paragospnizinski | JX124547 | USNM          | 1120444     | off Maryland, USA                                            | 400      | 37.06    | -74.62            |              |
| Paragorgia arborea         | Parboreal100758  | JX124584 | USNM          | 100758      | Aleutian Islands                                             | 52.00    | 52.00    | -170.00           |              |
| Paragorgia arborea         | Parboreal100817  | JX124539 | USNM          | 100817      | Atka Island, Andreanof Islands, Aleutian Islands             | 53.00    | 53.00    | -174.00           |              |
| Paragorgia arborea         | Parboreal100818  | JX124597 | USNM          | 100818      | Semisopchnoi Island, Rat Islands, Aleutian Islands           | 52.17    | 52.17    | 179.72            |              |
| Paragorgia arborea         | Parboreal100843  | JX124529 | USNM          | 100843      | Tanaga Island, Andreanof Islands, Aleutian Islands           | 52.00    | 52.00    | -178.00           |              |
| Paragorgia arborea         | Parboreal100846  | JX124538 | USNM          | 100846      | Yunaska Island, Islands of Four Mountains, Aleutian Islands  | 53.00    | 53.00    | -171.00           |              |
| Paragorgia arborea         | Parboreal1010787 | JX124528 | USNM          | 1010787     | Norfolk Canyon, Virginia, USA                                | 375-489  | 37.07    | -74.66            |              |
| Paragorgia arborea         | Parboreal1011097 | JX124545 | USNM          | 1011097     | Buldir Reef, Rat Islands, Aleutian Islands                   | 160      | 51.96    | 176.83            |              |
| Paragorgia arborea         | Parboreal1011360 | JX124582 | USNM          | 1011360     | off Ummak Island, Fox Islands, Aleutian Islands              | 102      | 53.68    | -169.11           |              |

|                           |                 |          |      |         |      |                                                         |          |        |         |              |
|---------------------------|-----------------|----------|------|---------|------|---------------------------------------------------------|----------|--------|---------|--------------|
| <i>Paragorgia arborea</i> | Parborea1092764 | JX124589 | USNM | 1092764 | 2000 | East of Virginia Beach, Virginia, USA                   | 375-489  | 37.07  | -74.66  | Sanchez 2005 |
| <i>Paragorgia arborea</i> | Parborea1092765 | JX124520 | USNM | 1092765 | 2000 | East of Virginia Beach, Virginia, USA                   | 375-489  | 37.07  | -74.66  |              |
| <i>Paragorgia arborea</i> | Parborea1092766 | JX124554 | USNM | 1092766 | 2000 | East of Virginia Beach, Virginia, USA                   | 375-489  | 37.07  | -74.66  |              |
| <i>Paragorgia arborea</i> | Parborea17969   | JX124607 | NIWA | 17969   | 2002 | New Zealand, 1621/18, Z11010                            | 900      | -44.74 | -177.19 |              |
| <i>Paragorgia arborea</i> | Parborea17970   | JX124605 | NIWA | 17970   | 2001 | New Zealand, AEX0101/80, Z10956                         | 753      | -44.74 | -177.19 |              |
| <i>Paragorgia arborea</i> | Parborea25527   | JX124548 | NIWA | 25527   | 2004 | New Zealand, TAN0408/23                                 | 826      | -42.83 | 177.42  |              |
| <i>Paragorgia arborea</i> | Parborea28123   | JX124546 | NIWA | 28123   | 2000 | New Zealand, 1390/12, Z11161                            | 872      | -47.31 | 165.83  |              |
| <i>Paragorgia arborea</i> | Parborea28154   | JX124553 | NIWA | 28154   | 1981 | New Zealand, T16                                        | 427      | -43.35 | 178.66  |              |
| <i>Paragorgia arborea</i> | Parborea28156   | JX124610 | NIWA | 28156   | 2002 | New Zealand, 1621/08, Z11008                            | 920      | -33.92 | 167.92  |              |
| <i>Paragorgia arborea</i> | Parborea28157   | JX124531 | NIWA | 28157   | 1999 | New Zealand, TRIP1223/29                                | 959      | -44.58 | -177.88 |              |
| <i>Paragorgia arborea</i> | Parborea28158   | JX124566 | NIWA | 28158   | 2001 | New Zealand, AEX0101/80, Z10907                         | 753      | -44.74 | -177.18 |              |
| <i>Paragorgia arborea</i> | Parborea28160   | JX124523 | NIWA | 28160   | 2001 | New Zealand                                             | 753      | -44.74 | -176.81 |              |
| <i>Paragorgia arborea</i> | Parborea28161   | JX124568 | NIWA | 28161   | 2001 | New Zealand, AEX0101/80, Z10920                         | 753      | -44.74 | -177.19 |              |
| <i>Paragorgia arborea</i> | Parborea28392   | JX124575 | NIWA | 28392   | 2001 | New Zealand, AEX0101/80, Z10956                         | 753      | -44.74 | -176.81 |              |
| <i>Paragorgia arborea</i> | Parborea28422   | JX124601 | NIWA | 28422   | 2001 | New Zealand, AEX0101/80, Z10920                         | 753      | -44.74 | -176.81 |              |
| <i>Paragorgia arborea</i> | Parborea28425   | JX124550 | NIWA | 28425   | 1997 | New Zealand, TAN9713/52, Z8979                          | 858      | -44.45 | -179.96 |              |
| <i>Paragorgia arborea</i> | Parborea3308    | JX124552 | NIWA | 3308    | 2002 | New Zealand, Z10987                                     | 1225     | -33.93 | 167.92  | Sanchez 2005 |
| <i>Paragorgia arborea</i> | Parborea3309    | JX124535 | NIWA | 3309    | 2002 | New Zealand, Z11009                                     | 955      | -33.93 | 167.91  | Sanchez 2005 |
| <i>Paragorgia arborea</i> | Parborea3310    | GQ293311 | NIWA | 3310    | 1999 | New Zealand, Z9862                                      | 687      | -44.75 | 174.82  | Sanchez 2005 |
| <i>Paragorgia arborea</i> | Parborea3311    | JX124525 | NIWA | 3311    | 1996 | New Zealand, Southern Havre trough, X700                | 1525     | -35.84 | 177.91  | Sanchez 2005 |
| <i>Paragorgia arborea</i> | Parborea33559   | JX124559 | USNM | 33559   | 1878 | Fishing Banks, North Carolina, USA                      | 457      | 36.00  | -74.00  |              |
| <i>Paragorgia arborea</i> | Parborea33561   | JX124562 | USNM | 33561   |      | Off NE North America, USA                               |          |        |         |              |
| <i>Paragorgia arborea</i> | Parborea4089    | JX124591 | USNM | 4089    |      | Sable Island, 50 Mile E Of E Light, Nova Scotia, Canada | 512      | 43.90  | -58.80  |              |
| <i>Paragorgia arborea</i> | Parborea4091    | JX124579 | USNM | 4091    | 1879 | Banquereau Bank, Nova Scotia, Canada                    | 366      | 44.58  | -57.68  |              |
| <i>Paragorgia arborea</i> | Parborea4178B   | JX124524 | USNM | 1123932 | 2002 | South of Trinity Islands, Aleutian Islands              | 746      | 55.87  | -154.06 |              |
| <i>Paragorgia arborea</i> | Parborea41829   | JX124585 | NIWA | 41829   | 2006 | New Zealand, TRIP2324/76                                | 1044     | -47.25 | 178.33  |              |
| <i>Paragorgia arborea</i> | Parborea41854   | JX124611 | NIWA | 41854   | 2007 | New Zealand, TRIP2494/10                                | 867-986  | -47.53 | 177.87  |              |
| <i>Paragorgia arborea</i> | Parborea41999   | JX124588 | NIWA | 41999   | 2007 | New Zealand, TRIP2551/50                                | 1203-121 | -44.50 | -174.79 |              |
| <i>Paragorgia arborea</i> | Parborea42001   | JX124574 | NIWA | 42001   | 2007 | New Zealand, TRIP2551/55                                | 1283-131 | -44.50 | -174.82 |              |
| <i>Paragorgia arborea</i> | Parborea4238    | JX124608 | USNM | 4238    | 1879 | Banquereau Bank, South Of, Nova Scotia, Canada          | 457      | 43.90  | -58.67  |              |
| <i>Paragorgia arborea</i> | Parborea4242    | JX124567 | USNM | 4242    | 1879 | Grand Banks, W Part Of, Newfoundland, Canada            | 1106-131 | -46.91 | 171.88  |              |
| <i>Paragorgia arborea</i> | Parborea44608   | JX124537 | NIWA | 44608   | 2007 | New Zealand, TRIP2506/81                                | 870-967  | -47.53 | 177.92  |              |
| <i>Paragorgia arborea</i> | Parborea44609   | JX124534 | NIWA | 44609   | 2007 | New Zealand, TRIP2506/135                               | 457      | 43.42  | -60.00  |              |
| <i>Paragorgia arborea</i> | Parborea4569    | JX124596 | USNM | 4569    | 1879 | Sable Island Bank, Nova Scotia, Canada                  | 750-855  | -46.48 | 170.60  |              |
| <i>Paragorgia arborea</i> | Parborea46320   | JX124570 | NIWA | 46320   | 2008 | New Zealand, TRIP2320/70                                | 480      | 38.17  | -73.84  |              |
| <i>Paragorgia arborea</i> | Parborea50890   | JX124521 | USNM | 50890   | 1927 | Burdwood Bank, S Of Falkland Islands, Scotia Sea        | 680-370  | 40.38  | -67.66  |              |
| <i>Paragorgia arborea</i> | Parborea80838   | JX124544 | USNM | 80838   | 1979 | Baltimore Canyon, Off Eastern Shore, Maryland, USA      | 613-430  | 40.38  | -67.66  |              |
| <i>Paragorgia arborea</i> | Parborea80936   | JX124543 | USNM | 80936   | 1979 | Lydonia Canyon, Massachusetts, USA                      | 843      | 51.81  | -173.83 |              |
| <i>Paragorgia arborea</i> | Parborea80937   | GQ293312 | USNM | 80937   | 1979 | Lydonia Canyon, Massachusetts, USA                      | 843      | 51.81  | -173.83 |              |
| <i>Paragorgia arborea</i> | Parborea2095271 | JX124532 | USNM | 1123936 | 2004 | Amlia Island, Andreanof Islands, Aleutian Islands       | 1269     | 51.51  | -177.04 |              |
| <i>Paragorgia arborea</i> | Parborea2095272 | JX124580 | USNM | 1123935 | 2004 | Amlia Island, Andreanof Islands, Aleutian Islands       | 747      | 51.72  | -179.58 |              |
| <i>Paragorgia arborea</i> | Parborea2099211 | JX124604 | USNM | 1123937 | 2004 | Adak Canyon, Andreanof Islands, Aleutian Islands        | 857      | 51.68  | -179.58 |              |
| <i>Paragorgia arborea</i> | Parborea210441  | JX124536 | USNM | 1123938 | 2004 | Amchitka Pass, Andreanof Islands, Aleutian Islands      | 480      | 37.67  | -74.65  |              |
| <i>Paragorgia arborea</i> | Parborea210462  | JX124555 | USNM | 1123934 | 2004 | Amchitka Pass, Andreanof Islands, Aleutian Islands      | 480      | 37.67  | -74.65  |              |
| <i>Paragorgia arborea</i> | ParboreaMCZ1572 | JX124606 | MCZ  | 15721   | 2002 | Atlantic Ocean                                          |          |        |         |              |



|                                 |                    |          |          |                  |      |                                                              |              |        |         |
|---------------------------------|--------------------|----------|----------|------------------|------|--------------------------------------------------------------|--------------|--------|---------|
| <i>Paragorgia arborea</i>       | ParboreaMCZ2805    | JX124551 | MCZ      | 28057            | 2001 | Nantucket Island, Massachusetts, USA                         | 156          | 41.97  | -65.87  |
| <i>Paragorgia arborea</i>       | ParboreaMCZ2869    | JX124561 | MCZ      | 28697            | 1878 | off Maine, USA                                               | 245          | 42.60  | -65.73  |
| <i>Paragorgia arborea</i>       | ParboreaMCZ5124    | JX124600 | MCZ      | 51244            | 1979 | Georges Bank, Massachusetts, USA                             | 700          | 41.00  | -67.00  |
| <i>Paragorgia arborea</i>       | ParboreaMNH0411    |          | MNH      | 0411             | 1997 | France, North Atlantic Ocean, France                         | 700          | 48.83  | -11.33  |
| <i>Paragorgia arborea</i>       | ParboreaMNH04      | JX124609 | MNH      | 412              | 2002 | off Norway                                                   | 66.70        | 11.60  | 10.50   |
| <i>Paragorgia arborea</i>       | ParboreaMNH04      | JX124564 | MNH      | 422              | 2002 | Tromsø Fjord, Norway                                         | 63.50        | 63.50  | 10.50   |
| <i>Paragorgia arborea</i>       | ParboreaP33560     | JX124572 | USNM     | 33560            |      | Fishing Banks, North Carolina, USA                           | 45.00        | 45.00  | -53.50  |
| <i>Paragorgia arborea</i>       | ParboreaT661A10    | JX124590 | USNM     | 1122237          | 2002 | Rodriguez Seamount, California, USA                          | 894.5        | 34.06  | -121.08 |
| <i>Paragorgia arborea</i>       | ParboreaT662A28    | JX124522 | USNM     | 1122240          | 2002 | San Juan Seamount, California, USA                           | 1362.9       | 32.97  | -121.04 |
| <i>Paragorgia arborea</i>       | ParboreaT662A29    | JX124586 | USNM     | 1122233          | 2002 | San Juan Seamount, California, USA                           | 1360.8       | 32.97  | -121.04 |
| <i>Paragorgia arborea</i>       | ParboreaZ11166     | JX124533 | NIWA     | 76238            | 2007 | New Zealand                                                  | 891          | -44.44 | 175.54  |
| <i>Paragorgia arborea</i>       | ParboreaZC0706     | JX124598 | B. Stone | ZC0706ROV01      | 2005 | Zhemchug Canyon, Bering Sea                                  | 171          | -47.54 | 177.93  |
| <i>Paragorgia arborea</i>       | PcfarboreaJapan    | JX124557 | WPMNH    |                  | 2005 | Off Yaizu-shi, Shizuoka Pref., Japan                         | 760-800      | 33.00  | 138.40  |
| <i>Paragorgia arborea</i>       | Ppacific1016320    | JX124581 | USNM     | 1016320          | 2002 | British Columbia, Canada                                     | 1152-1153.70 |        | -133.42 |
| <i>Paragorgia arborea</i>       | TC16_03            |          | WHOI     | HBI1302_TC016    | 2013 | NE US Canyons; Munson Canyon; TowCam 16                      | 540          | 40.54  | -67.01  |
| <i>Paragorgia cf dendroides</i> | Pcfidndro98788     |          | USNM     | 98788            | 1996 | USA, Hawaii, Lanai Island, Keanapapa Point, SW of Point      | 1007         | 20.78  | -157.15 |
| <i>Paragorgia cf dendroides</i> | Pcfidndro98792     |          | USNM     | 98792            | 1996 | USA, Hawaii, Lanai Island, Keanapapa Point, SW of Point      | 1018         | 20.78  | -157.15 |
| <i>Paragorgia cf dendroides</i> | PcfidndroT662A30   |          | USNM     | 1122228          | 200? | USA, California, San Juan Seamount                           | 1237.6       | 32.97  | -121.03 |
| <i>Paragorgia cf johnsoni</i>   |                    |          |          |                  |      |                                                              |              |        |         |
| <i>Paragorgia cf johnsoni</i>   | Pcfregalis1072337  |          | USNM     | 1072337          | 2003 | USA, Hawaii, Pioneer Bank                                    | 1211         | 25.81  | -173.50 |
| <i>Paragorgia coralloides</i>   | 06390              |          | WHOI     | REH112-5         | 2005 | New England Seamounts; Rehobot Seamount; H13                 | 1821         | 37.46  | -59.95  |
| <i>Paragorgia coralloides</i>   | 12016              |          | WHOI     | leftover sieving | 2003 | New England Seamounts; Manning Seamount, station 4; AD3      | 2000         | 38.23  | -60.46  |
| <i>Paragorgia coralloides</i>   | Pcfcorallo98785    | JX128350 | USNM     | 98785            | 1995 | East Pacific Rise, off Mexico                                | 1950         | 12.73  | -102.60 |
| <i>Paragorgia dendroides</i>    | Pcfidndroid1072362 |          | USNM     | 1072362          | 2003 | USA, Hawaii, Necker Island, Seamount East of Island          | 1536         | 23.30  | -163.70 |
| <i>Paragorgia johnsoni</i>      | 20136              |          | TU-WHC   | 0909-Oct1        | 2009 | Gulf of Mexico; MC751; J2-464                                | 438          | 28.19  | -89.80  |
| <i>Paragorgia johnsoni</i>      | Paragosp100898     |          | USNM     | 100898           | 2000 | USA, North Atlantic Ocean, South of Georges Bank             |              | 39.86  | -67.42  |
| <i>Paragorgia johnsoni</i>      | Pjohnsoni73767     |          | USNM     | 73767            | 1984 | Little Bahama Bank, Bahamas                                  | 608          | 27.10  | -79.70  |
| <i>Paragorgia johnsoni</i>      |                    |          |          |                  |      |                                                              |              |        |         |
| <i>Paragorgia kaupeka</i>       | 72152              |          | NIWA     | 72152            | 2011 | Kermadec Ridge; Clark Seamount, chimney field, north cone;   | 877          | -36.45 | 177.84  |
| <i>Paragorgia kaupeka</i>       | 82260              |          | NIWA     | 82260            | 2012 | Kermadec Ridge; Site SM3a, summit of Clark Seamount; TAN 850 | 850          | -36.45 | 177.84  |
| <i>Paragorgia kaupeka</i>       | 82342              |          | NIWA     | 82342            | 2012 | Kermadec Ridge; Site SM3a, Clark Seamount; TAN1206/40        | 1100         | -36.45 | 177.84  |
| <i>Paragorgia kaupeka</i>       | 84804              |          | NIWA     | 84804            | 2005 | Kermadec Ridge; Clark Seamount; KOK0506/12                   | 870          | -36.45 | 177.84  |
| <i>Paragorgia kaupeka</i>       | Pkaupeka3320       | GQ293313 | NIWA     | 3320             | 1989 | New Zealand, X152                                            | 820          | -36.16 | 176.81  |
| <i>Paragorgia maunga</i>        | 64980              |          | NIWA     | 64980            | 2010 | Kermadec Ridge; Silent II seamount; TAN1007/120              | 772          | -35.17 | 178.89  |
| <i>Paragorgia maunga</i>        | Pmaunga28393       |          | NIWA     | 28393            | 1999 | New Zealand, Z9779                                           | 1121         | -34.12 | 174.90  |
| <i>Paragorgia maunga</i>        | Pmaunga3322        |          | NIWA     | 3322             | 2002 | New Zealand, Wāngānui Bank, TRIP, Z10989                     | 1082         | -33.89 | 167.94  |
| <i>Paragorgia maunga</i>        | Pmaunga3323        |          | NIWA     | 3323             | 1999 | New Zealand, Z9779                                           | 1121         | -34.12 | 174.90  |
| <i>Paragorgia regalis</i>       | ParagospT629A6     |          | USNM     | 1122239          | 200? | USA, California, Rodriguez Seamount                          | 1843.8       | 33.95  | -121.14 |
| <i>Paragorgia regalis</i>       | Pcfidndro98789     |          | USNM     | 98789            | 1996 | USA, Hawaii, Lanai Island, Keanapapa Point, SW of Point      | 1018         | 20.78  | -157.15 |
| <i>Paragorgia regalis</i>       | PcfidndroidT630A5  |          | USNM     | 1122192          | 200? | USA, California, Rodriguez Seamount                          | 1031.8       | 34.00  | -121.10 |
| <i>Paragorgia regalis</i>       | Pregalis1027063    |          | USNM     | 1027063          | 2003 | USA, California, Rodriguez Seamount, West of San Miguel Pa   | 1840         | 33.95  | -121.14 |
| <i>Paragorgia regalis</i>       | Pregalis1072338    |          | USNM     | 1072338          | 2003 | USA, Hawaii, Lanai Island, SE of Island                      | 1136         | 25.67  | -171.41 |
| <i>Paragorgia regalis</i>       | Pregalis1072339    |          | USNM     | 1072339          | 2003 | USA, Hawaii, Pioneer Bank                                    | 1743.7       | 25.57  | -173.51 |
| <i>Paragorgia regalis</i>       | Pregalis1072340    |          | USNM     | 1072340          | 2004 | USA, Hawaii, Pioneer Bank                                    | 1744.7       | 25.57  | -173.51 |
| <i>Paragorgia regalis</i>       |                    |          |          |                  | 2003 | Cross Seamount; Hawaii; USA                                  | 452          | 19.74  | -158.30 |
| <i>Paragorgia regalis</i>       |                    |          |          |                  |      |                                                              |              |        |         |
| <i>Paragorgia regalis</i>       | GQ293307           |          | USNM     | 1014743          | 2003 | Cross Seamount; Hawaii; USA                                  | 452          | 19.74  | -158.30 |

| Paragorgia regalis   | JQ241244        | USNM      | 1007354 | 2001 | Canada, British Columbia, Vancouver Island                  | 1168    | 48.44    | -126.38          |
|----------------------|-----------------|-----------|---------|------|-------------------------------------------------------------|---------|----------|------------------|
| Paragorgia sp        | Paragosp1007354 | USNM      | 1007354 | 2001 | Canada, British Columbia, Vancouver Island                  | 1168    | 48.44    | -126.38          |
| Paragorgia sp        | Paragosp1011093 | USNM      | 1011093 | 2002 | USA, Bering Sea, Forrester Island                           | 601-800 | 55.40    | -134.83          |
| Paragorgia sp        | Paragosp1011094 | USNM      | 1011094 | 2002 | USA, Bering Sea, East of Kodiak Island                      | 601-836 | 58.22    | -148.70          |
| Paragorgia sp        | Paragosp1011095 | USNM      | 1011095 | 2002 | USA, Bering Sea, Alaska, Alexander Archipelago, Baranof Isl | 601-715 | 57.19    | -136.24          |
| Paragorgia sp        | Paragosp1027079 | USNM      | 1027079 | 2002 | USA, California, Rodriguez Seamount, West of San Miguel Pa  | 1030    | 34.05    | -121.10          |
| Paragorgia sp        | Paragosp1071233 | USNM      | 1071233 | 2004 | USA, Hawaii, Cross Seamount                                 | 410     | 18.73    | -158.26          |
| Paragorgia sp        | Paragosp1071440 | USNM      | 1071440 | 2004 | USA, Hawaii, Cross Seamount                                 | 427.51  | 18.73    | -158.26          |
| Paragorgia sp        | Paragosp1071441 | USNM      | 1071441 | 2004 | USA, Hawaii, Cross Seamount                                 | 427.51  | 18.73    | -158.26          |
| Paragorgia sp        | Paragosp1072336 | USNM      | 1072336 | 2003 | USA, Hawaii, Raita Bank                                     | 573     | 25.63    | -169.32          |
| Paragorgia sp        | Paragosp1075392 | USNM      | 1075392 | 2004 | USA, Gulf of Alaska, Alaska, Giacomini Seamount             | 733     | 56.42    | -146.37          |
| Paragorgia sp        | Paragosp1075750 | USNM      | 1075750 | 2004 | USA, Gulf of Alaska, Alaska, Welker Seamount                | 718     | 55.05    | -140.31          |
| Paragorgia sp        | Paragosp1075751 | USNM      | 1075751 | 2004 | USA, Gulf of Alaska, Alaska, Welker Seamount                | 782     | 55.05    | -140.31          |
| Paragorgia sp        | Paragosp1075752 | USNM      | 1075752 | 2004 | USA, Gulf of Alaska, Alaska, Welker Seamount                | 1119    | 55.06    | -140.41          |
| Paragorgia sp        | Paragosp1075755 | USNM      | 1075755 | 2004 | USA, Gulf of Alaska, Alaska, Welker Seamount                | 1050    | 55.06    | -140.41          |
| Paragorgia sp        | Paragosp1075756 | USNM      | 1075756 | 2004 | USA, Gulf of Alaska, Alaska, Welker Seamount                | 1050    | 55.06    | -140.41          |
| Paragorgia sp        | Paragosp1075757 | USNM      | 1075757 | 2004 | USA, Gulf of Alaska, Alaska, Pratt Seamount                 | 1093    | 56.30    | -142.47          |
| Paragorgia sp        | Paragosp1075759 | USNM      | 1075759 | 2004 | USA, Gulf of Alaska, Alaska, Pratt Seamount                 | 1069    | 56.17    | -142.70          |
| Paragorgia sp        | Paragosp1075764 | USNM      | 1075764 | 2004 | USA, Gulf of Alaska, Alaska, Pratt Seamount                 | 920     | 56.17    | -142.70          |
| Paragorgia sp        | Paragosp1075769 | USNM      | 1075769 | 2004 | USA, Gulf of Alaska, Alaska, Giacomini Seamount             | 730     | 56.42    | -146.37          |
| Paragorgia sp        | Paragosp1082595 | USNM      | 1082595 | 2002 | USA, Gulf of Alaska, Alaska, Murray Seamount                | 855     | 53.89    | -148.53          |
| Paragorgia sp        | Paragosp1082600 | USNM      | 1082600 | 2002 | USA, Gulf of Alaska, Alaska, Murray Seamount                | 1376    | 53.99    | -148.50          |
| Paragorgia sp        | Paragosp1082644 | USNM      | 1082644 | 2002 | USA, Washington, Warwick Seamount                           | 768     | 48.05    | -132.74          |
| Paragorgia sp        | Paragosp1200601 | Stone-Sea | 1200601 | 2006 | Gulf of Alaska                                              | 741     | 53.98    | -162.85          |
| Paragorgia sp        | Paragosp121     | USNM      | 1122305 | 2004 | British Columbia, Canada                                    | 549     | 53.73    | -163.98          |
| <i>Paragorgia</i> sp | JX128347        | USNM      | 1122305 | 2004 | British Columbia, Canada                                    | 549     | 53.73    | -163.98          |
| Paragorgia sp        | Paragosp1310601 | Stone-Sea | 1310601 | 2006 | Gulf of Alaska                                              |         |          |                  |
| Paragorgia sp        | Paragosp159     | USNM      | 1122302 | 2003 | Canada, British Columbia                                    |         |          |                  |
| Paragorgia sp        | Paragosp165     | USNM      | 1122303 | 2003 | Canada, British Columbia, Brooks Peninsula                  |         |          |                  |
| Paragorgia sp        | Paragosp27294   | YPM       | 27294   | 2000 | Bear Seamount                                               |         | 39.92    | -67.44           |
| Paragorgia sp        | Paragosp28905   | YPM       | 28905   | 2003 | USA, Atlantic Ocean, Muir Seamount                          | 1713    | 33.85    | -62.66           |
| Paragorgia sp        | Paragosp28911   | YPM       | 28911   | 2003 | USA, Atlantic Ocean, Manning Seamount                       | 1550    | 38.22    | -60.46           |
| Paragorgia sp        | Paragosp28921   | YPM       | 28921   | 2003 | USA, Atlantic Ocean, Manning Seamount                       | 1579    | 38.21    | -60.53           |
| Paragorgia sp        | Paragosp28946   | YPM       | 28946   | 2003 | USA, Atlantic Ocean, Manning Seamount                       | 1597    | 38.20    | -60.53           |
| Paragorgia sp        | Paragosp291     | USNM      | 1122306 | 2004 | Canada, British Columbia                                    |         |          |                  |
| Paragorgia sp        | Paragosp34786   | YPM       | 34786   | 2004 | Atlantic Ocean, Manning Seamount, on summit                 | 1336    | 38.22    | -60.51           |
| Paragorgia sp        | Paragosp35381   | YPM       | 35381   | 2004 | USA, Manning Seamount, on summit                            | 1337    | 38.22    | -60.51           |
| Paragorgia sp        | Paragosp36781   | YPM       | 36781   | 2004 | Bear Seamount, South rim of table top peak                  | 1428-16 | 39.87    | -67.36           |
| Paragorgia sp        | Paragosp36910C  | YPM       | 36910C  | 2004 | Bear Seamount, South rim of table top peak                  | 1428-16 | 39.87    | -67.36           |
| Paragorgia sp        | Paragosp37148   | YPM       | 37148   | 2003 | USA, Manning Seamount                                       | 1483    | 38.26    | -60.55           |
| Paragorgia sp        | Paragosp38636   | YPM       | 38636   | 2004 | Bear Seamount, South rim of table top peak                  | 1428-16 | 39.87    | -67.36           |
| Paragorgia sp        | Paragosp41849   | NIWA      | 41849   | 2007 | New Zealand, TRIP2494/97                                    | 1155.0  | -47.0100 | 175.580000000000 |
| Paragorgia sp        | Paragosp44607   | NIWA      | 44607   | 2007 | New Zealand, TRIP2506/24                                    | 858.0   | -50.0516 | 174.7150000000   |
| Paragorgia sp        | Paragosp54830   | USNM      | 54830   | 1974 | USA, Florida, Straits of Florida, Off Delray Beach          | 743-761 | 26.38    | -79.60           |
| Paragorgia sp        | Paragosp56615   | USNM      | 56615   | 1974 | USA, Florida, Straits of Florida, Off Mile Beach            | 770-660 | 25.71    | -79.79           |
| Paragorgia sp        | Paragosp56690   | USNM      | 56690   |      | USA, Hawaii, Oahu Island, Makapuu Point                     | 366     |          |                  |

|                            |                   |           |                  |      |                                                                 |         |          |              |
|----------------------------|-------------------|-----------|------------------|------|-----------------------------------------------------------------|---------|----------|--------------|
| Paragorgia sp              | Paragospn32830    | NIWA      | 32830            | 2005 | New Zealand, Tangaroa Seamount, P629-4B, KOK0507/4              | 790     | -36.3284 | 178.0359955  |
| Paragorgia sp              | ParagospT665A3    | USNM      | 1122225          | 2007 | USA, California, San Juan Seamount                              | 706.6   | 33.11    | -120.96      |
| Paragorgia sp              | Parborea28423     | NIWA      | 28423            | 1998 | New Zealand, 1152/48, Z9275                                     | 660     | -34.18   | 162.65       |
| Paragorgia sp              | Parborea28717     | YPM       | 28717            | 2003 | Manning Seamount                                                | 1372    | 38.22    | -61.51       |
| Paragorgia sp              | PefaoteaT668A3    | USNM      | 1122226          | 2007 | USA, California, Little Joe Seamount                            | 2397.8  | 31.89    | -120.05      |
| Paragorgia sp              | PefaoteaT669A15   | USNM      | 1122227          | 2007 | USA, California, San Marcos Seamount                            | 2061.7  | 32.64    | -121.51      |
| Paragorgia sp              | PcfstepheT665A4   | USNM      | 1122235          | 2007 | USA, California, San Juan Seamount                              | 720.5   | 33.11    | -120.96      |
| Paragorgia sp              | PcfwahineT627A3   | USNM      | 1122238          | 2007 | USA, California, Pioneer Seamount                               | 1771.5  | 37.40    | -123.44      |
| Paragorgia sp              | PcfwahineT630A6   | USNM      | 1122234          | 2007 | USA, California, Rodriguez Seamount                             | 1031.9  | 34.00    | -121.10      |
| Paragorgia sp              | PcfyutliT663A1614 | USNM      | 1122231          | 2007 | USA, California, Northeast Bank                                 | 546.6   | 32.32    | -119.61      |
| Paragorgia sp              |                   |           |                  |      |                                                                 |         |          |              |
| Paragorgia stephencairnsi  | 2344              | RBCM      | 010-00234-004    | 2004 | British Columbia, VE13978                                       | 1194    | 53.37    | -133.31      |
| Paragorgia stephencairnsi  | 101010            | USNM      | 1157074          | 2008 | California; Piggy Bank, southern California; DW-026-02          | 283     | 33.92    | -119.47      |
| Paragorgia stephencairnsi  | 1007316           | USNM      | 1007316          | 2001 | British Columbia; Vancouver Island                              | 1168    | 48.44    | -126.38      |
| Paragorgia stephencairnsi  | 1124300           | USNM      | 1124300          | 2006 | British Columbia; Vancouver Island, Ohlat Island; OC 06/952     | 188     | 48.83    | -125.13      |
| Paragorgia stephencairnsi  | Agam              | WHOI      | Agam             | 2012 | British Columbia; Agammon Channel                               | 32      | 49.72    | -124.05      |
| Paragorgia stephencairnsi  | C02               | WHOI      | C02              | 2013 | British Columbia; Agammon Channel; Dive02                       | 41      | 49.74    | -124.03      |
| Paragorgia stephencairnsi  | C03               | WHOI      | C03              | 2013 | British Columbia; Agammon Channel; Dive02                       | 41      | 49.74    | -124.03      |
| Paragorgia stephencairnsi  | C04               | WHOI      | C04              | 2013 | British Columbia; Agammon Channel; Dive02                       | 41      | 49.74    | -124.03      |
| Paragorgia stephencairnsi  | C05               | WHOI      | C05              | 2013 | British Columbia; Agammon Channel; Dive02                       | 41      | 49.74    | -124.03      |
| Paragorgia stephencairnsi  | C100              | WHOI      | C100             | 2013 | British Columbia; Vancouver Island, Tahsis Inlet; Dive07        | 40      | 49.86    | -126.67      |
| Paragorgia stephencairnsi  | C101              | WHOI      | C101             | 2013 | British Columbia; Vancouver Island, Tahsis Inlet; Dive07        | 40      | 49.86    | -126.67      |
| Paragorgia stephencairnsi  | C102              | WHOI      | C102             | 2013 | British Columbia; Vancouver Island, Tahsis Inlet; Dive07        | 40      | 49.86    | -126.67      |
| Paragorgia stephencairnsi  | C104              | WHOI      | C104             | 2013 | British Columbia; Vancouver Island, Tahsis Inlet; Dive07        | 40      | 49.86    | -126.67      |
| Paragorgia stephencairnsi  | FOC25             | DFO       | 25               | 2012 | British Columbia; W of Graham Island; 2012-65                   | 204     | 53.31    | -133.03      |
| Paragorgia stephencairnsi  | FOC26             | DFO       | 26               | 2012 | British Columbia; W of Graham Island; 2012-65                   | 221     | 53.30    | -133.04      |
| Paragorgia stephencairnsi  | FOC30             | DFO       | 30               | 2012 | British Columbia; W of Graham Island; 2012-65                   | 318     | 53.48    | -133.07      |
| Paragorgia stephencairnsi  | FOC5              | DFO       | 5                | 2009 | British Columbia; E of Graham Island; 2009-47                   | 201     | 52.13    | -128.90      |
| Paragorgia stephencairnsi  | Paragosp1075741   | USNM      | 1075741          | 2004 | USA, Gulf of Alaska, Alaska, Dickins Seamount                   | 751     | 54.55    | -136.84      |
| Paragorgia stephencairnsi  | Paragosp1092785   | USNM      | 1092785          | 2005 | USA, North Pacific Ocean, Alexander Archipelago, Baranof I; 171 | 56.19   | -135.10  |              |
| Paragorgia stephencairnsi  | Paragosp200601    | Stone-Sea | 200601106B01     | 2006 | Gulf of Alaska                                                  | 479     | 55.40    | -134.83      |
| Paragorgia stephencairnsi  | Paragosp77        | USNM      | 1122304          | 2004 | Canada, British Columbia, Brooks Peninsula                      | 49.94   | -128.06  |              |
| Paragorgia stephencairnsi  | Parborea41106     | USNM      | 1123931          | 2004 | USA, Bering Sea, GOA                                            | 417     | 55.37    | -134.78      |
| Paragorgia stephencairnsi  | Parborea411081    | USNM      | 1123930          | 2004 | USA, Bering Sea, GOA                                            | 427     | 54.47    | -133.97      |
| Paragorgia stephencairnsi  | ParboreaNew100    | USNM      | 1124301          | 2006 | Canada, British Columbia, Vancouver Island, Barkley Sound       | 270.22  | 48.26    | -125.01      |
| Paragorgia stephencairnsi  | ParboreaNew545    | USNM      | 1124298          | 2006 | Canada, British Columbia, Vancouver Island, Barkley Sound       | 309.5   | 48.15    | -125.07      |
| Paragorgia stephencairnsi  |                   | CAS       | 190438           | 2010 | California, Farallon Escarpment                                 | 424     | 37.74    | -123.19      |
| <i>Paragorgia walinae</i>  | Pwahine3326       | NIWA      | 3326             | 2001 | New Zealand, Diabolical seamount, TAN0104/113                   | 900     | -42.79   | 179.99 type  |
| Paragorgia whero           | Pwhero3436        | NIWA      | 3436             | 1998 | New Zealand, TRIP1171/12, Z9583                                 | 935     | -48.03   | 166.10 type  |
| <i>Paragorgia yutlinax</i> | Pyutlinux1073480  | USNM      | 1073480          | 2003 | Off Vancouver Isl., British Columbia, Canada                    | 846-861 | 50.23    | -128.58 type |
| Paraminabea aldersladei    |                   |           |                  |      |                                                                 |         |          |              |
| Paraminabea aldersladei    |                   |           |                  |      |                                                                 |         |          |              |
| Paraminabea aldersladei    |                   |           |                  |      |                                                                 |         |          |              |
| Sibogorgia cauliflora      | 2036              | KC984605  | TU-WHC 2036-Oct1 | 2009 | Gulf of Mexico; DC583; J2-454                                   | 2440    | 28.39    | -87.39       |
| Sibogorgia cauliflora      | 1122230           | GQ293310  | USNM 1122230     | 2006 | California; Davidson seamount; dive 945                         | 2502    | 35.83    | -122.61 type |

|                                    |                 |          |      |         |      |                                    |               |        |         |
|------------------------------------|-----------------|----------|------|---------|------|------------------------------------|---------------|--------|---------|
| <i>Sibogorgia cauliflora</i>       | Sibogasp1T947A9 | GQ293317 | USNM | 1122229 | 2006 | Davidson Seamount, California, USA | 3042.4        | 35.63  | -122.83 |
| <i>Sibogorgia cauliflora</i>       |                 | GQ293308 | USNM | 1081143 | 2004 | Derrickson Seamount, Alaska: USA   | 2766          | 52.98  | -161.25 |
| <i>Sibogorgia cauliflora</i>       |                 | GQ293309 | USNM | 54831   | 1968 | Straits of Florida: Havana: Cuba   | 1638-17:23.55 |        | -82.78  |
| <i>Sibogorgia dennisgordoni</i>    |                 | GQ293316 | NIWA | 3329    | 1998 | New Zealand, 1124/70, Z9228        | 820           | -36.69 | 176.46  |
| <i>Sphaerocleria flammicerebra</i> |                 | JX203765 |      |         |      |                                    |               |        |         |

Acronyms as follows: National Museum of Natural History, Smithsonian Institution, USA (USNM); The National Institute of Water and Atmospheric Research, New Zealand (NIWA); Museum of Comparative Zoology, Harvard University, USA (MCZ); Muséum National d'Histoire Naturelle, Paris, France (MNHN); Senckenberg Research Institute And Natural History Museum Frankfurt, Germany (SMF); Uppsala University Evolutionsmuseet, Sweden (UUZM); Wakayama Prefectural Museum of Natural History, Japan (WPMNH); Yale Peabody Museum of Natural History, USA (YPM), Department of Fisheries and Oceans Canada (DFO), Woods Hole Oceanographic Institution (WHOI), Temple University (TU), Royal British Columbia Museum (RBCM), California Academy of Sciences (CAS)

For enabling access to specimens we thank K. Schnabel (NIWA), S. Mills (NIWA), D. Tracey (NIWA), M. Clark (NIWA), A. Rowden (NIWA), S. Cairns (Smithsonian), E. Cordes (Temple U.), A. Quattrini (Temple U.), G. Workman (Department of Fisheries and Oceans Canada - DFO), M. Wyeth (DFO), K. Anderson (DFO), M. Frey (Royal British Columbia Museum - RBCM), H. Garther (RBCM), L. Watling (U. Hawaii), J. Adkins (CalTech), P. Emoyer (NOAA), G. Williams (CAS), J. Sanchez (U. Andes), P. Alderslade (CSIRO), A. Andouche (MNHN), A. Andrews (MLML), A. Baco (FSU), A. Baldinger (MCZ), J. A. Boutilier (DFO), S. Davies (DFO), M. Eriksson (UUZM), Y. Imahara (WPMNH), D. Janussen (SMF), E. Lazo-Wasem (YPM), P. Lozouet (MNHN), L. Lundsten (MBARI), B. Stone (NOAA), and many others involved in the planning, collection, and curation.
